# Supplementary material for: Shifts in northern Arizona plant and insect pollinator communities between 2 years with substantially different precipitation totals
Source: Copernicus journal article supplement (doi:10.5194/we-25-5-2025), 2025-01-10
Supplement: Supplementary file 1 [file we-25-5-2025-supplement.zip]

## Sheet: Tables and Totals
	2014				2015				2016				2017				2018				CUMULATIVE - All 5 years individually							CUMULATIVE - 3 years prior averaged					DAILYS- Just the study years
	Date	Precip 2017	Cum Precip		Date	Precip 2018	Cum Precip		Date	Precip 2018	Cum Precip		Date	Precip 2018	Cum Precip		Date	Precip 2018	Cum Precip		Date	Cum Precip 2014	Cum Precip 2015	Cum Precip 2016	Cum Precip 2017	Cum Precip 2018		Date	Average Cumulative Precip 2014-2016	Cumulative Precip "wet year" (2017)	Cumulative Precip "dry year" (2018)		Date	Daily precip "wet" year (inches)	Daily precip "dry" year (inches)
	2013-12-01	0	0		2014-12-01	0	0		2015-12-01	0	0		2016-12-01	0	0		2017-12-01	0	0		2015-12-01	0	0	0	0	0		2015-12-01	0	0	0		2013-12-01	0	0
	2013-12-02	0	0		2014-12-02	0.06	0.06		2015-12-02	0	0		2016-12-02	0	0		2017-12-02	0	0		2015-12-02	0	0.06	0	0	0		2015-12-02	0.02	0	0		2013-12-02	0	0
	2013-12-03	0	0		2014-12-03	1.07	1.13		2015-12-03	0	0		2016-12-03	0	0		2017-12-03	0	0		2015-12-03	0	1.13	0	0	0		2015-12-03	0.376667	0	0		2013-12-03	0	0
	2013-12-04	0.31	0.31		2014-12-04	0.66	1.79		2015-12-04	0	0		2016-12-04	0	0		2017-12-04	0	0		2015-12-04	0.31	1.79	0	0	0		2015-12-04	0.7	0	0		2013-12-04	0	0
	2013-12-05	0	0.31		2014-12-05	0	1.79		2015-12-05	0	0		2016-12-05	0	0		2017-12-05	0	0		2015-12-05	0.31	1.79	0	0	0		2015-12-05	0.7	0	0		2013-12-05	0	0
	2013-12-06	0	0.31		2014-12-06	0	1.79		2015-12-06	0	0		2016-12-06	0	0		2017-12-06	0	0		2015-12-06	0.31	1.79	0	0	0		2015-12-06	0.7	0	0		2013-12-06	0	0
	2013-12-07	0.25	0.56		2014-12-07	0	1.79		2015-12-07	0	0		2016-12-07	0	0		2017-12-07	0	0		2015-12-07	0.56	1.79	0	0	0		2015-12-07	0.783333	0	0		2013-12-07	0	0
	2013-12-08	0.09	0.65		2014-12-08	0	1.79		2015-12-08	0	0		2016-12-08	0	0		2017-12-08	0	0		2015-12-08	0.65	1.79	0	0	0		2015-12-08	0.813333	0	0		2013-12-08	0	0
	2013-12-09	0	0.65		2014-12-09	0	1.79		2015-12-09	0	0		2016-12-09	0	0		2017-12-09	0	0		2015-12-09	0.65	1.79	0	0	0		2015-12-09	0.813333	0	0		2013-12-09	0	0
	2013-12-10	0	0.65		2014-12-10	0	1.79		2015-12-10	0	0		2016-12-10	0	0		2017-12-10	0	0		2015-12-10	0.65	1.79	0	0	0		2015-12-10	0.813333	0	0		2013-12-10	0	0
	2013-12-11	0	0.65		2014-12-11	0	1.79		2015-12-11	0.41	0.41		2016-12-11	0	0		2017-12-11	0	0		2015-12-11	0.65	1.79	0.41	0	0		2015-12-11	0.95	0	0		2013-12-11	0	0
	2013-12-12	0	0.65		2014-12-12	0.05	1.84		2015-12-12	0.11	0.52		2016-12-12	0	0		2017-12-12	0	0		2015-12-12	0.65	1.84	0.52	0	0		2015-12-12	1.00333	0	0		2013-12-12	0	0
	2013-12-13	0	0.65		2014-12-13	0.58	2.42		2015-12-13	0	0.52		2016-12-13	0	0		2017-12-13	0	0		2015-12-13	0.65	2.42	0.52	0	0		2015-12-13	1.19667	0	0		2013-12-13	0	0
	2013-12-14	0	0.65		2014-12-14	0	2.42		2015-12-14	0.33	0.85		2016-12-14	0	0		2017-12-14	0	0		2015-12-14	0.65	2.42	0.85	0	0		2015-12-14	1.30667	0	0		2013-12-14	0	0
	2013-12-15	0	0.65		2014-12-15	0	2.42		2015-12-15	0	0.85		2016-12-15	0	0		2017-12-15	0	0		2015-12-15	0.65	2.42	0.85	0	0		2015-12-15	1.30667	0	0		2013-12-15	0	0
	2013-12-16	0	0.65		2014-12-16	0	2.42		2015-12-16	0	0.85		2016-12-16	1.11	1.11		2017-12-16	0	0		2015-12-16	0.65	2.42	0.85	1.11	0		2015-12-16	1.30667	1.11	0		2013-12-16	1.11	0
	2013-12-17	0	0.65		2014-12-17	0.09	2.51		2015-12-17	0	0.85		2016-12-17	0.01	1.12		2017-12-17	0	0		2015-12-17	0.65	2.51	0.85	1.12	0		2015-12-17	1.33667	1.12	0		2013-12-17	0.01	0
	2013-12-18	0	0.65		2014-12-18	0.2	2.71		2015-12-18	0	0.85		2016-12-18	0	1.12		2017-12-18	0	0		2015-12-18	0.65	2.71	0.85	1.12	0		2015-12-18	1.40333	1.12	0		2013-12-18	0	0
	2013-12-19	0.38	1.03		2014-12-19	0	2.71		2015-12-19	0	0.85		2016-12-19	0	1.12		2017-12-19	0	0		2015-12-19	1.03	2.71	0.85	1.12	0		2015-12-19	1.53	1.12	0		2013-12-19	0	0
	2013-12-20	0.32	1.35		2014-12-20	0	2.71		2015-12-20	0.1	0.95		2016-12-20	0	1.12		2017-12-20	0	0		2015-12-20	1.35	2.71	0.95	1.12	0		2015-12-20	1.67	1.12	0		2013-12-20	0	0
	2013-12-21	0	1.35		2014-12-21	0	2.71		2015-12-21	0	0.95		2016-12-21	0.35	1.47		2017-12-21	0	0		2015-12-21	1.35	2.71	0.95	1.47	0		2015-12-21	1.67	1.47	0		2013-12-21	0.35	0
	2013-12-22	0	1.35		2014-12-22	0	2.71		2015-12-22	0.04	0.99		2016-12-22	1.48	2.95		2017-12-22	0	0		2015-12-22	1.35	2.71	0.99	2.95	0		2015-12-22	1.68333	2.95	0		2013-12-22	1.48	0
	2013-12-23	0	1.35		2014-12-23	0	2.71		2015-12-23	0.01	1		2016-12-23	0.04	2.99		2017-12-23	0	0		2015-12-23	1.35	2.71	1	2.99	0		2015-12-23	1.68667	2.99	0		2013-12-23	0.04	0
	2013-12-24	0	1.35		2014-12-24	0	2.71		2015-12-24	0.01	1.01		2016-12-24	0.84	3.83		2017-12-24	0	0		2015-12-24	1.35	2.71	1.01	3.83	0		2015-12-24	1.69	3.83	0		2013-12-24	0.84	0
	2013-12-25	0	1.35		2014-12-25	0.04	2.75		2015-12-25	0.02	1.03		2016-12-25	0.26	4.09		2017-12-25	0	0		2015-12-25	1.35	2.75	1.03	4.09	0		2015-12-25	1.71	4.09	0		2013-12-25	0.26	0
	2013-12-26	0	1.35		2014-12-26	0	2.75		2015-12-26	0	1.03		2016-12-26	0	4.09		2017-12-26	0	0		2015-12-26	1.35	2.75	1.03	4.09	0		2015-12-26	1.71	4.09	0		2013-12-26	0	0
	2013-12-27	0	1.35		2014-12-27	0	2.75		2015-12-27	0	1.03		2016-12-27	0	4.09		2017-12-27	0	0		2015-12-27	1.35	2.75	1.03	4.09	0		2015-12-27	1.71	4.09	0		2013-12-27	0	0
	2013-12-28	0	1.35		2014-12-28	0	2.75		2015-12-28	0	1.03		2016-12-28	0	4.09		2017-12-28	0	0		2015-12-28	1.35	2.75	1.03	4.09	0		2015-12-28	1.71	4.09	0		2013-12-28	0	0
	2013-12-29	0	1.35		2014-12-29	0	2.75		2015-12-29	0	1.03		2016-12-29	0	4.09		2017-12-29	0	0		2015-12-29	1.35	2.75	1.03	4.09	0		2015-12-29	1.71	4.09	0		2013-12-29	0	0
	2013-12-30	0	1.35		2014-12-30	0	2.75		2015-12-30	0	1.03		2016-12-30	0.23	4.32		2017-12-30	0	0		2015-12-30	1.35	2.75	1.03	4.32	0		2015-12-30	1.71	4.32	0		2013-12-30	0.23	0
	2013-12-31	0	1.35		2014-12-31	0.69	3.44		2015-12-31	0	1.03		2016-12-31	0.1	4.42		2017-12-31	0	0		2015-12-31	1.35	3.44	1.03	4.42	0		2015-12-31	1.94	4.42	0		2013-12-31	0.1	0
	2014-01-01	0	1.35		2015-01-01	0.17	3.61		2016-01-01	0	1.03		2017-01-01	0.54	4.96		2018-01-01	0	0		2016-01-01	1.35	3.61	1.03	4.96	0		2016-01-01	1.99667	4.96	0		2014-01-01	0.54	0
	2014-01-02	0	1.35		2015-01-02	0	3.61		2016-01-02	0	1.03		2017-01-02	0.07	5.03		2018-01-02	0	0		2016-01-02	1.35	3.61	1.03	5.03	0		2016-01-02	1.99667	5.03	0		2014-01-02	0.07	0
	2014-01-03	0	1.35		2015-01-03	0	3.61		2016-01-03	0	1.03		2017-01-03	0	5.03		2018-01-03	0	0		2016-01-03	1.35	3.61	1.03	5.03	0		2016-01-03	1.99667	5.03	0		2014-01-03	0	0
	2014-01-04	0	1.35		2015-01-04	0	3.61		2016-01-04	0.35	1.38		2017-01-04	0	5.03		2018-01-04	0	0		2016-01-04	1.35	3.61	1.38	5.03	0		2016-01-04	2.11333	5.03	0		2014-01-04	0	0
	2014-01-05	0	1.35		2015-01-05	0	3.61		2016-01-05	0.37	1.75		2017-01-05	0.42	5.45		2018-01-05	0	0		2016-01-05	1.35	3.61	1.75	5.45	0		2016-01-05	2.23667	5.45	0		2014-01-05	0.42	0
	2014-01-06	0	1.35		2015-01-06	0	3.61		2016-01-06	0.89	2.64		2017-01-06	0.03	5.48		2018-01-06	0	0		2016-01-06	1.35	3.61	2.64	5.48	0		2016-01-06	2.53333	5.48	0		2014-01-06	0.03	0
	2014-01-07	0	1.35		2015-01-07	0	3.61		2016-01-07	1.08	3.72		2017-01-07	0	5.48		2018-01-07	0	0		2016-01-07	1.35	3.61	3.72	5.48	0		2016-01-07	2.89333	5.48	0		2014-01-07	0	0
	2014-01-08	0	1.35		2015-01-08	0	3.61		2016-01-08	0	3.72		2017-01-08	0.02	5.5		2018-01-08	0	0		2016-01-08	1.35	3.61	3.72	5.5	0		2016-01-08	2.89333	5.5	0		2014-01-08	0.02	0
	2014-01-09	0	1.35		2015-01-09	0	3.61		2016-01-09	0	3.72		2017-01-09	0.24	5.74		2018-01-09	1.05	1.05		2016-01-09	1.35	3.61	3.72	5.74	1.05		2016-01-09	2.89333	5.74	1.05		2014-01-09	0.24	1.05
	2014-01-10	0	1.35		2015-01-10	0.13	3.74		2016-01-10	0	3.72		2017-01-10	0	5.74		2018-01-10	0.14	1.19		2016-01-10	1.35	3.74	3.72	5.74	1.19		2016-01-10	2.93667	5.74	1.19		2014-01-10	0	0.14
	2014-01-11	0	1.35		2015-01-11	0.02	3.76		2016-01-11	0	3.72		2017-01-11	0	5.74		2018-01-11	0	1.19		2016-01-11	1.35	3.76	3.72	5.74	1.19		2016-01-11	2.94333	5.74	1.19		2014-01-11	0	0
	2014-01-12	0	1.35		2015-01-12	0.16	3.92		2016-01-12	0	3.72		2017-01-12	0	5.74		2018-01-12	0	1.19		2016-01-12	1.35	3.92	3.72	5.74	1.19		2016-01-12	2.99667	5.74	1.19		2014-01-12	0	0
	2014-01-13	0	1.35		2015-01-13	0.53	4.45		2016-01-13	0	3.72		2017-01-13	0.05	5.79		2018-01-13	0	1.19		2016-01-13	1.35	4.45	3.72	5.79	1.19		2016-01-13	3.17333	5.79	1.19		2014-01-13	0.05	0
	2014-01-14	0	1.35		2015-01-14	0	4.45		2016-01-14	0	3.72		2017-01-14	0.76	6.55		2018-01-14	0	1.19		2016-01-14	1.35	4.45	3.72	6.55	1.19		2016-01-14	3.17333	6.55	1.19		2014-01-14	0.76	0
	2014-01-15	0	1.35		2015-01-15	0	4.45		2016-01-15	0.21	3.93		2017-01-15	0	6.55		2018-01-15	0	1.19		2016-01-15	1.35	4.45	3.93	6.55	1.19		2016-01-15	3.24333	6.55	1.19		2014-01-15	0	0
	2014-01-16	0	1.35		2015-01-16	0	4.45		2016-01-16	0	3.93		2017-01-16	0.01	6.56		2018-01-16	0	1.19		2016-01-16	1.35	4.45	3.93	6.56	1.19		2016-01-16	3.24333	6.56	1.19		2014-01-16	0.01	0
	2014-01-17	0	1.35		2015-01-17	0	4.45		2016-01-17	0	3.93		2017-01-17	0	6.56		2018-01-17	0	1.19		2016-01-17	1.35	4.45	3.93	6.56	1.19		2016-01-17	3.24333	6.56	1.19		2014-01-17	0	0
	2014-01-18	0	1.35		2015-01-18	0	4.45		2016-01-18	0	3.93		2017-01-18	0	6.56		2018-01-18	0	1.19		2016-01-18	1.35	4.45	3.93	6.56	1.19		2016-01-18	3.24333	6.56	1.19		2014-01-18	0	0
	2014-01-19	0	1.35		2015-01-19	0	4.45		2016-01-19	0.01	3.94		2017-01-19	0.41	6.97		2018-01-19	0	1.19		2016-01-19	1.35	4.45	3.94	6.97	1.19		2016-01-19	3.24667	6.97	1.19		2014-01-19	0.41	0
	2014-01-20	0	1.35		2015-01-20	0	4.45		2016-01-20	0	3.94		2017-01-20	0.71	7.68		2018-01-20	0.51	1.7		2016-01-20	1.35	4.45	3.94	7.68	1.7		2016-01-20	3.24667	7.68	1.7		2014-01-20	0.71	0.51
	2014-01-21	0	1.35		2015-01-21	0.04	4.49		2016-01-21	0	3.94		2017-01-21	0.24	7.92		2018-01-21	0.01	1.71		2016-01-21	1.35	4.49	3.94	7.92	1.71		2016-01-21	3.26	7.92	1.71		2014-01-21	0.24	0.01
	2014-01-22	0	1.35		2015-01-22	0	4.49		2016-01-22	0	3.94		2017-01-22	0.11	8.03		2018-01-22	0	1.71		2016-01-22	1.35	4.49	3.94	8.03	1.71		2016-01-22	3.26	8.03	1.71		2014-01-22	0.11	0
	2014-01-23	0	1.35		2015-01-23	0	4.49		2016-01-23	0	3.94		2017-01-23	0.61	8.64		2018-01-23	0	1.71		2016-01-23	1.35	4.49	3.94	8.64	1.71		2016-01-23	3.26	8.64	1.71		2014-01-23	0.61	0
	2014-01-24	0	1.35		2015-01-24	0	4.49		2016-01-24	0	3.94		2017-01-24	0.31	8.95		2018-01-24	0	1.71		2016-01-24	1.35	4.49	3.94	8.95	1.71		2016-01-24	3.26	8.95	1.71		2014-01-24	0.31	0
	2014-01-25	0	1.35		2015-01-25	0	4.49		2016-01-25	0	3.94		2017-01-25	0.02	8.97		2018-01-25	0	1.71		2016-01-25	1.35	4.49	3.94	8.97	1.71		2016-01-25	3.26	8.97	1.71		2014-01-25	0.02	0
	2014-01-26	0	1.35		2015-01-26	0	4.49		2016-01-26	0	3.94		2017-01-26	0	8.97		2018-01-26	0	1.71		2016-01-26	1.35	4.49	3.94	8.97	1.71		2016-01-26	3.26	8.97	1.71		2014-01-26	0	0
	2014-01-27	0	1.35		2015-01-27	0.04	4.53		2016-01-27	0	3.94		2017-01-27	0	8.97		2018-01-27	0	1.71		2016-01-27	1.35	4.53	3.94	8.97	1.71		2016-01-27	3.27333	8.97	1.71		2014-01-27	0	0
	2014-01-28	0	1.35		2015-01-28	0	4.53		2016-01-28	0	3.94		2017-01-28	0	8.97		2018-01-28	0	1.71		2016-01-28	1.35	4.53	3.94	8.97	1.71		2016-01-28	3.27333	8.97	1.71		2014-01-28	0	0
	2014-01-29	0	1.35		2015-01-29	0.29	4.82		2016-01-29	0	3.94		2017-01-29	0	8.97		2018-01-29	0	1.71		2016-01-29	1.35	4.82	3.94	8.97	1.71		2016-01-29	3.37	8.97	1.71		2014-01-29	0	0
	2014-01-30	0	1.35		2015-01-30	0.78	5.6		2016-01-30	0	3.94		2017-01-30	0	8.97		2018-01-30	0	1.71		2016-01-30	1.35	5.6	3.94	8.97	1.71		2016-01-30	3.63	8.97	1.71		2014-01-30	0	0
	2014-01-31	0.17	1.52		2015-01-31	0.03	5.63		2016-01-31	0.5	4.44		2017-01-31	0	8.97		2018-01-31	0	1.71		2016-01-31	1.52	5.63	4.44	8.97	1.71		2016-01-31	3.86333	8.97	1.71		2014-01-31	0	0
	2014-02-01	0.02	1.54		2015-02-01	0	5.63		2016-02-01	0.37	4.81		2017-02-01	0	8.97		2018-02-01	0	1.71		2016-02-01	1.54	5.63	4.81	8.97	1.71		2016-02-01	3.99333	8.97	1.71		2014-02-01	0	0
	2014-02-02	0	1.54		2015-02-02	0	5.63		2016-02-02	0	4.81		2017-02-02	0	8.97		2018-02-02	0	1.71		2016-02-02	1.54	5.63	4.81	8.97	1.71		2016-02-02	3.99333	8.97	1.71		2014-02-02	0	0
	2014-02-03	0.01	1.55		2015-02-03	0	5.63		2016-02-03	0	4.81		2017-02-03	0	8.97		2018-02-03	0	1.71		2016-02-03	1.55	5.63	4.81	8.97	1.71		2016-02-03	3.99667	8.97	1.71		2014-02-03	0	0
	2014-02-04	0	1.55		2015-02-04	0	5.63		2016-02-04	0	4.81		2017-02-04	0	8.97		2018-02-04	0	1.71		2016-02-04	1.55	5.63	4.81	8.97	1.71		2016-02-04	3.99667	8.97	1.71		2014-02-04	0	0
	2014-02-05	0	1.55		2015-02-05	0	5.63		2016-02-05	0	4.81		2017-02-05	0	8.97		2018-02-05	0	1.71		2016-02-05	1.55	5.63	4.81	8.97	1.71		2016-02-05	3.99667	8.97	1.71		2014-02-05	0	0
	2014-02-06	0.02	1.57		2015-02-06	0	5.63		2016-02-06	0	4.81		2017-02-06	0	8.97		2018-02-06	0	1.71		2016-02-06	1.57	5.63	4.81	8.97	1.71		2016-02-06	4.00333	8.97	1.71		2014-02-06	0	0
	2014-02-07	0.07	1.64		2015-02-07	0	5.63		2016-02-07	0	4.81		2017-02-07	0.04	9.01		2018-02-07	0	1.71		2016-02-07	1.64	5.63	4.81	9.01	1.71		2016-02-07	4.02667	9.01	1.71		2014-02-07	0.04	0
	2014-02-08	0	1.64		2015-02-08	0	5.63		2016-02-08	0	4.81		2017-02-08	0	9.01		2018-02-08	0	1.71		2016-02-08	1.64	5.63	4.81	9.01	1.71		2016-02-08	4.02667	9.01	1.71		2014-02-08	0	0
	2014-02-09	0	1.64		2015-02-09	0	5.63		2016-02-09	0	4.81		2017-02-09	0	9.01		2018-02-09	0	1.71		2016-02-09	1.64	5.63	4.81	9.01	1.71		2016-02-09	4.02667	9.01	1.71		2014-02-09	0	0
	2014-02-10	0	1.64		2015-02-10	0	5.63		2016-02-10	0	4.81		2017-02-10	0	9.01		2018-02-10	0	1.71		2016-02-10	1.64	5.63	4.81	9.01	1.71		2016-02-10	4.02667	9.01	1.71		2014-02-10	0	0
	2014-02-11	0	1.64		2015-02-11	0	5.63		2016-02-11	0	4.81		2017-02-11	0.05	9.06		2018-02-11	0	1.71		2016-02-11	1.64	5.63	4.81	9.06	1.71		2016-02-11	4.02667	9.06	1.71		2014-02-11	0.05	0
	2014-02-12	0	1.64		2015-02-12	0	5.63		2016-02-12	0	4.81		2017-02-12	0.2	9.26		2018-02-12	0.83	2.54		2016-02-12	1.64	5.63	4.81	9.26	2.54		2016-02-12	4.02667	9.26	2.54		2014-02-12	0.2	0.83
	2014-02-13	0	1.64		2015-02-13	0	5.63		2016-02-13	0	4.81		2017-02-13	0	9.26		2018-02-13	0.12	2.66		2016-02-13	1.64	5.63	4.81	9.26	2.66		2016-02-13	4.02667	9.26	2.66		2014-02-13	0	0.12
	2014-02-14	0	1.64		2015-02-14	0	5.63		2016-02-14	0	4.81		2017-02-14	0	9.26		2018-02-14	0.35	3.01		2016-02-14	1.64	5.63	4.81	9.26	3.01		2016-02-14	4.02667	9.26	3.01		2014-02-14	0	0.35
	2014-02-15	0	1.64		2015-02-15	0	5.63		2016-02-15	0	4.81		2017-02-15	0	9.26		2018-02-15	0.02	3.03		2016-02-15	1.64	5.63	4.81	9.26	3.03		2016-02-15	4.02667	9.26	3.03		2014-02-15	0	0.02
	2014-02-16	0	1.64		2015-02-16	0	5.63		2016-02-16	0	4.81		2017-02-16	0	9.26		2018-02-16	0	3.03		2016-02-16	1.64	5.63	4.81	9.26	3.03		2016-02-16	4.02667	9.26	3.03		2014-02-16	0	0
	2014-02-17	0	1.64		2015-02-17	0	5.63		2016-02-17	0	4.81		2017-02-17	0.02	9.28		2018-02-17	0	3.03		2016-02-17	1.64	5.63	4.81	9.28	3.03		2016-02-17	4.02667	9.28	3.03		2014-02-17	0.02	0
	2014-02-18	0	1.64		2015-02-18	0	5.63		2016-02-18	0	4.81		2017-02-18	0.3	9.58		2018-02-18	0	3.03		2016-02-18	1.64	5.63	4.81	9.58	3.03		2016-02-18	4.02667	9.58	3.03		2014-02-18	0.3	0
	2014-02-19	0	1.64		2015-02-19	0	5.63		2016-02-19	0	4.81		2017-02-19	0.11	9.69		2018-02-19	0.12	3.15		2016-02-19	1.64	5.63	4.81	9.69	3.15		2016-02-19	4.02667	9.69	3.15		2014-02-19	0.11	0.12
	2014-02-20	0	1.64		2015-02-20	0	5.63		2016-02-20	0	4.81		2017-02-20	0	9.69		2018-02-20	0	3.15		2016-02-20	1.64	5.63	4.81	9.69	3.15		2016-02-20	4.02667	9.69	3.15		2014-02-20	0	0
	2014-02-21	0	1.64		2015-02-21	0	5.63		2016-02-21	0	4.81		2017-02-21	0	9.69		2018-02-21	0	3.15		2016-02-21	1.64	5.63	4.81	9.69	3.15		2016-02-21	4.02667	9.69	3.15		2014-02-21	0	0
	2014-02-22	0	1.64		2015-02-22	0.27	5.9		2016-02-22	0	4.81		2017-02-22	0	9.69		2018-02-22	0	3.15		2016-02-22	1.64	5.9	4.81	9.69	3.15		2016-02-22	4.11667	9.69	3.15		2014-02-22	0	0
	2014-02-23	0	1.64		2015-02-23	1.3	7.2		2016-02-23	0	4.81		2017-02-23	0	9.69		2018-02-23	0.47	3.62		2016-02-23	1.64	7.2	4.81	9.69	3.62		2016-02-23	4.55	9.69	3.62		2014-02-23	0	0.47
	2014-02-24	0	1.64		2015-02-24	0.07	7.27		2016-02-24	0	4.81		2017-02-24	0	9.69		2018-02-24	0	3.62		2016-02-24	1.64	7.27	4.81	9.69	3.62		2016-02-24	4.57333	9.69	3.62		2014-02-24	0	0
	2014-02-25	0	1.64		2015-02-25	0	7.27		2016-02-25	0	4.81		2017-02-25	0	9.69		2018-02-25	0	3.62		2016-02-25	1.64	7.27	4.81	9.69	3.62		2016-02-25	4.57333	9.69	3.62		2014-02-25	0	0
	2014-02-26	0	1.64		2015-02-26	0	7.27		2016-02-26	0	4.81		2017-02-26	0	9.69		2018-02-26	0	3.62		2016-02-26	1.64	7.27	4.81	9.69	3.62		2016-02-26	4.57333	9.69	3.62		2014-02-26	0	0
	2014-02-27	0	1.64		2015-02-27	0	7.27		2016-02-27	0	4.81		2017-02-27	0.86	10.55		2018-02-27	0.21	3.83		2016-02-27	1.64	7.27	4.81	10.55	3.83		2016-02-27	4.57333	10.55	3.83		2014-02-27	0.86	0.21
	2014-02-28	0.31	1.95		2015-02-28	0.48	7.75		2016-02-28	0	4.81		2017-02-28	0.75	11.3		2018-02-28	0.25	4.08		2016-02-28	1.95	7.75	4.81	11.3	4.08		2016-02-28	4.83667	11.3	4.08		2014-02-28	0.75	0.25
	2014-03-01	1.09	3.04		2015-03-01	1.98	9.73		2016-02-29	0	4.81		2017-03-01	0	11.3		2018-03-01	0	4.08		2016-02-29	1.95	7.75	4.81	11.3	4.08		2016-02-29	4.83667	11.3	4.08		2014-03-01	0	0
	2014-03-02	0.04	3.08		2015-03-02	1.71	11.44		2016-03-01	0	4.81		2017-03-02	0	11.3		2018-03-02	0	4.08		2016-03-01	3.04	9.73	4.81	11.3	4.08		2016-03-01	5.86	11.3	4.08		2014-03-02	0	0
	2014-03-03	0	3.08		2015-03-03	0	11.44		2016-03-02	0	4.81		2017-03-03	0	11.3		2018-03-03	0	4.08		2016-03-02	3.08	11.44	4.81	11.3	4.08		2016-03-02	6.44333	11.3	4.08		2014-03-03	0	0
	2014-03-04	0	3.08		2015-03-04	0	11.44		2016-03-03	0	4.81		2017-03-04	0	11.3		2018-03-04	0.01	4.09		2016-03-03	3.08	11.44	4.81	11.3	4.08		2016-03-03	6.44333	11.3	4.08		2014-03-04	0	0.01
	2014-03-05	0	3.08		2015-03-05	0	11.44		2016-03-04	0	4.81		2017-03-05	0	11.3		2018-03-05	0	4.09		2016-03-04	3.08	11.44	4.81	11.3	4.09		2016-03-04	6.44333	11.3	4.09		2014-03-05	0	0
	2014-03-06	0	3.08		2015-03-06	0	11.44		2016-03-05	0	4.81		2017-03-06	0	11.3		2018-03-06	0	4.09		2016-03-05	3.08	11.44	4.81	11.3	4.09		2016-03-05	6.44333	11.3	4.09		2014-03-06	0	0
	2014-03-07	0	3.08		2015-03-07	0	11.44		2016-03-06	0.21	5.02		2017-03-07	0	11.3		2018-03-07	0	4.09		2016-03-06	3.08	11.44	5.02	11.3	4.09		2016-03-06	6.51333	11.3	4.09		2014-03-07	0	0
	2014-03-08	0	3.08		2015-03-08	0	11.44		2016-03-07	0.01	5.03		2017-03-08	0	11.3		2018-03-08	0	4.09		2016-03-07	3.08	11.44	5.03	11.3	4.09		2016-03-07	6.51667	11.3	4.09		2014-03-08	0	0
	2014-03-09	0	3.08		2015-03-09	0	11.44		2016-03-08	0	5.03		2017-03-09	0	11.3		2018-03-09	0	4.09		2016-03-08	3.08	11.44	5.03	11.3	4.09		2016-03-08	6.51667	11.3	4.09		2014-03-09	0	0
	2014-03-10	0	3.08		2015-03-10	0	11.44		2016-03-09	0	5.03		2017-03-10	0	11.3		2018-03-10	0.1	4.19		2016-03-09	3.08	11.44	5.03	11.3	4.09		2016-03-09	6.51667	11.3	4.09		2014-03-10	0	0.1
	2014-03-11	0	3.08		2015-03-11	0	11.44		2016-03-10	0	5.03		2017-03-11	0	11.3		2018-03-11	0.24	4.43		2016-03-10	3.08	11.44	5.03	11.3	4.19		2016-03-10	6.51667	11.3	4.19		2014-03-11	0	0.24
	2014-03-12	0	3.08		2015-03-12	0.04	11.48		2016-03-11	0	5.03		2017-03-12	0	11.3		2018-03-12	0	4.43		2016-03-11	3.08	11.44	5.03	11.3	4.43		2016-03-11	6.51667	11.3	4.43		2014-03-12	0	0
	2014-03-13	0	3.08		2015-03-13	0	11.48		2016-03-12	0	5.03		2017-03-13	0	11.3		2018-03-13	0	4.43		2016-03-12	3.08	11.48	5.03	11.3	4.43		2016-03-12	6.53	11.3	4.43		2014-03-13	0	0
	2014-03-14	0.01	3.09		2015-03-14	0	11.48		2016-03-13	0	5.03		2017-03-14	0	11.3		2018-03-14	0	4.43		2016-03-13	3.08	11.48	5.03	11.3	4.43		2016-03-13	6.53	11.3	4.43		2014-03-14	0	0
	2014-03-15	0	3.09		2015-03-15	0	11.48		2016-03-14	0	5.03		2017-03-15	0	11.3		2018-03-15	0.25	4.68		2016-03-14	3.09	11.48	5.03	11.3	4.43		2016-03-14	6.53333	11.3	4.43		2014-03-15	0	0.25
	2014-03-16	0	3.09		2015-03-16	0	11.48		2016-03-15	0	5.03		2017-03-16	0	11.3		2018-03-16	0	4.68		2016-03-15	3.09	11.48	5.03	11.3	4.68		2016-03-15	6.53333	11.3	4.68		2014-03-16	0	0
	2014-03-17	0	3.09		2015-03-17	0	11.48		2016-03-16	0	5.03		2017-03-17	0	11.3		2018-03-17	0.02	4.7		2016-03-16	3.09	11.48	5.03	11.3	4.68		2016-03-16	6.53333	11.3	4.68		2014-03-17	0	0.02
	2014-03-18	0	3.09		2015-03-18	0	11.48		2016-03-17	0	5.03		2017-03-18	0	11.3		2018-03-18	0.24	4.94		2016-03-17	3.09	11.48	5.03	11.3	4.7		2016-03-17	6.53333	11.3	4.7		2014-03-18	0	0.24
	2014-03-19	0	3.09		2015-03-19	0	11.48		2016-03-18	0	5.03		2017-03-19	0	11.3		2018-03-19	0	4.94		2016-03-18	3.09	11.48	5.03	11.3	4.94		2016-03-18	6.53333	11.3	4.94		2014-03-19	0	0
	2014-03-20	0	3.09		2015-03-20	0	11.48		2016-03-19	0	5.03		2017-03-20	0	11.3		2018-03-20	0	4.94		2016-03-19	3.09	11.48	5.03	11.3	4.94		2016-03-19	6.53333	11.3	4.94		2014-03-20	0	0
	2014-03-21	0	3.09		2015-03-21	0	11.48		2016-03-20	0	5.03		2017-03-21	0	11.3		2018-03-21	0	4.94		2016-03-20	3.09	11.48	5.03	11.3	4.94		2016-03-20	6.53333	11.3	4.94		2014-03-21	0	0
	2014-03-22	0	3.09		2015-03-22	0	11.48		2016-03-21	0	5.03		2017-03-22	0.46	11.76		2018-03-22	0	4.94		2016-03-21	3.09	11.48	5.03	11.3	4.94		2016-03-21	6.53333	11.3	4.94		2014-03-22	0.46	0
	2014-03-23	0	3.09		2015-03-23	0	11.48		2016-03-22	0	5.03		2017-03-23	0.75	12.51		2018-03-23	0.07	5.01		2016-03-22	3.09	11.48	5.03	11.76	4.94		2016-03-22	6.53333	11.76	4.94		2014-03-23	0.75	0.07
	2014-03-24	0	3.09		2015-03-24	0	11.48		2016-03-23	0	5.03		2017-03-24	0	12.51		2018-03-24	0	5.01		2016-03-23	3.09	11.48	5.03	12.51	5.01		2016-03-23	6.53333	12.51	5.01		2014-03-24	0	0
	2014-03-25	0	3.09		2015-03-25	0	11.48		2016-03-24	0	5.03		2017-03-25	0.01	12.52		2018-03-25	0	5.01		2016-03-24	3.09	11.48	5.03	12.51	5.01		2016-03-24	6.53333	12.51	5.01		2014-03-25	0.01	0
	2014-03-26	0.1	3.19		2015-03-26	0	11.48		2016-03-25	0	5.03		2017-03-26	0	12.52		2018-03-26	0	5.01		2016-03-25	3.09	11.48	5.03	12.52	5.01		2016-03-25	6.53333	12.52	5.01		2014-03-26	0	0
	2014-03-27	0	3.19		2015-03-27	0	11.48		2016-03-26	0	5.03		2017-03-27	0.21	12.73		2018-03-27	0	5.01		2016-03-26	3.19	11.48	5.03	12.52	5.01		2016-03-26	6.56667	12.52	5.01		2014-03-27	0.21	0
	2014-03-28	0	3.19		2015-03-28	0	11.48		2016-03-27	0	5.03		2017-03-28	0	12.73		2018-03-28	0	5.01		2016-03-27	3.19	11.48	5.03	12.73	5.01		2016-03-27	6.56667	12.73	5.01		2014-03-28	0	0
	2014-03-29	0	3.19		2015-03-29	0	11.48		2016-03-28	0.01	5.04		2017-03-29	0	12.73		2018-03-29	0	5.01		2016-03-28	3.19	11.48	5.04	12.73	5.01		2016-03-28	6.57	12.73	5.01		2014-03-29	0	0
	2014-03-30	0	3.19		2015-03-30	0	11.48		2016-03-29	0.07	5.11		2017-03-30	0.09	12.82		2018-03-30	0	5.01		2016-03-29	3.19	11.48	5.11	12.73	5.01		2016-03-29	6.59333	12.73	5.01		2014-03-30	0.09	0
	2014-03-31	0	3.19		2015-03-31	0	11.48		2016-03-30	0.07	5.18		2017-03-31	0.27	13.09		2018-03-31	0	5.01		2016-03-30	3.19	11.48	5.18	12.82	5.01		2016-03-30	6.61667	12.82	5.01		2014-03-31	0.27	0
	2014-04-01	0	3.19		2015-04-01	0	11.48		2016-03-31	0	5.18		2017-04-01	0	13.09		2018-04-01	0	5.01		2016-03-31	3.19	11.48	5.18	13.09	5.01		2016-03-31	6.61667	13.09	5.01		2014-04-01	0	0
	2014-04-02	0.3	3.49		2015-04-02	0	11.48		2016-04-01	0	5.18		2017-04-02	0	13.09		2018-04-02	0	5.01		2016-04-01	3.19	11.48	5.18	13.09	5.01		2016-04-01	6.61667	13.09	5.01		2014-04-02	0	0
	2014-04-03	0	3.49		2015-04-03	0	11.48		2016-04-02	0	5.18		2017-04-03	0.17	13.26		2018-04-03	0	5.01		2016-04-02	3.49	11.48	5.18	13.09	5.01		2016-04-02	6.71667	13.09	5.01		2014-04-03	0.17	0
	2014-04-04	0	3.49		2015-04-04	0	11.48		2016-04-03	0	5.18		2017-04-04	0	13.26		2018-04-04	0	5.01		2016-04-03	3.49	11.48	5.18	13.26	5.01		2016-04-03	6.71667	13.26	5.01		2014-04-04	0	0
	2014-04-05	0.03	3.52		2015-04-05	0	11.48		2016-04-04	0	5.18		2017-04-05	0	13.26		2018-04-05	0	5.01		2016-04-04	3.49	11.48	5.18	13.26	5.01		2016-04-04	6.71667	13.26	5.01		2014-04-05	0	0
	2014-04-06	0	3.52		2015-04-06	0	11.48		2016-04-05	0	5.18		2017-04-06	0	13.26		2018-04-06	0	5.01		2016-04-05	3.52	11.48	5.18	13.26	5.01		2016-04-05	6.72667	13.26	5.01		2014-04-06	0	0
	2014-04-07	0	3.52		2015-04-07	0	11.48		2016-04-06	0	5.18		2017-04-07	0	13.26		2018-04-07	0	5.01		2016-04-06	3.52	11.48	5.18	13.26	5.01		2016-04-06	6.72667	13.26	5.01		2014-04-07	0	0
	2014-04-08	0	3.52		2015-04-08	0	11.48		2016-04-07	0	5.18		2017-04-08	0	13.26		2018-04-08	0	5.01		2016-04-07	3.52	11.48	5.18	13.26	5.01		2016-04-07	6.72667	13.26	5.01		2014-04-08	0	0
	2014-04-09	0	3.52		2015-04-09	0	11.48		2016-04-08	0.48	5.66		2017-04-09	0	13.26		2018-04-09	0	5.01		2016-04-08	3.52	11.48	5.66	13.26	5.01		2016-04-08	6.88667	13.26	5.01		2014-04-09	0	0
	2014-04-10	0	3.52		2015-04-10	0	11.48		2016-04-09	0	5.66		2017-04-10	0	13.26		2018-04-10	0	5.01		2016-04-09	3.52	11.48	5.66	13.26	5.01		2016-04-09	6.88667	13.26	5.01		2014-04-10	0	0
	2014-04-11	0	3.52		2015-04-11	0	11.48		2016-04-10	0.13	5.79		2017-04-11	0	13.26		2018-04-11	0	5.01		2016-04-10	3.52	11.48	5.79	13.26	5.01		2016-04-10	6.93	13.26	5.01		2014-04-11	0	0
	2014-04-12	0	3.52		2015-04-12	0	11.48		2016-04-11	0	5.79		2017-04-12	0	13.26		2018-04-12	0	5.01		2016-04-11	3.52	11.48	5.79	13.26	5.01		2016-04-11	6.93	13.26	5.01		2014-04-12	0	0
	2014-04-13	0	3.52		2015-04-13	0	11.48		2016-04-12	0.02	5.81		2017-04-13	0	13.26		2018-04-13	0	5.01		2016-04-12	3.52	11.48	5.81	13.26	5.01		2016-04-12	6.93667	13.26	5.01		2014-04-13	0	0
	2014-04-14	0	3.52		2015-04-14	0	11.48		2016-04-13	0	5.81		2017-04-14	0	13.26		2018-04-14	0	5.01		2016-04-13	3.52	11.48	5.81	13.26	5.01		2016-04-13	6.93667	13.26	5.01		2014-04-14	0	0
	2014-04-15	0	3.52		2015-04-15	0	11.48		2016-04-14	0	5.81		2017-04-15	0	13.26		2018-04-15	0	5.01		2016-04-14	3.52	11.48	5.81	13.26	5.01		2016-04-14	6.93667	13.26	5.01		2014-04-15	0	0
	2014-04-16	0	3.52		2015-04-16	0	11.48		2016-04-15	0.15	5.96		2017-04-16	0	13.26		2018-04-16	0	5.01		2016-04-15	3.52	11.48	5.96	13.26	5.01		2016-04-15	6.98667	13.26	5.01		2014-04-16	0	0
	2014-04-17	0	3.52		2015-04-17	0.03	11.51		2016-04-16	0.01	5.97		2017-04-17	0	13.26		2018-04-17	0	5.01		2016-04-16	3.52	11.48	5.97	13.26	5.01		2016-04-16	6.99	13.26	5.01		2014-04-17	0	0
	2014-04-18	0.02	3.54		2015-04-18	0	11.51		2016-04-17	0	5.97		2017-04-18	0	13.26		2018-04-18	0	5.01		2016-04-17	3.52	11.51	5.97	13.26	5.01		2016-04-17	7	13.26	5.01		2014-04-18	0	0
	2014-04-19	0	3.54		2015-04-19	0	11.51		2016-04-18	0	5.97		2017-04-19	0	13.26		2018-04-19	0	5.01		2016-04-18	3.54	11.51	5.97	13.26	5.01		2016-04-18	7.00667	13.26	5.01		2014-04-19	0	0
	2014-04-20	0	3.54		2015-04-20	0	11.51		2016-04-19	0	5.97		2017-04-20	0	13.26		2018-04-20	0.06	5.07		2016-04-19	3.54	11.51	5.97	13.26	5.01		2016-04-19	7.00667	13.26	5.01		2014-04-20	0	0.06
	2014-04-21	0	3.54		2015-04-21	0	11.51		2016-04-20	0	5.97		2017-04-21	0	13.26		2018-04-21	0	5.07		2016-04-20	3.54	11.51	5.97	13.26	5.07		2016-04-20	7.00667	13.26	5.07		2014-04-21	0	0
	2014-04-22	0	3.54		2015-04-22	0	11.51		2016-04-21	0	5.97		2017-04-22	0	13.26		2018-04-22	0	5.07		2016-04-21	3.54	11.51	5.97	13.26	5.07		2016-04-21	7.00667	13.26	5.07		2014-04-22	0	0
	2014-04-23	0	3.54		2015-04-23	0	11.51		2016-04-22	0	5.97		2017-04-23	0	13.26		2018-04-23	0	5.07		2016-04-22	3.54	11.51	5.97	13.26	5.07		2016-04-22	7.00667	13.26	5.07		2014-04-23	0	0
	2014-04-24	0	3.54		2015-04-24	0.46	11.97		2016-04-23	0	5.97		2017-04-24	0	13.26		2018-04-24	0	5.07		2016-04-23	3.54	11.51	5.97	13.26	5.07		2016-04-23	7.00667	13.26	5.07		2014-04-24	0	0
	2014-04-25	0	3.54		2015-04-25	0.57	12.54		2016-04-24	0	5.97		2017-04-25	0	13.26		2018-04-25	0	5.07		2016-04-24	3.54	11.97	5.97	13.26	5.07		2016-04-24	7.16	13.26	5.07		2014-04-25	0	0
	2014-04-26	0.9	4.44		2015-04-26	0.03	12.57		2016-04-25	0.04	6.01		2017-04-26	0	13.26		2018-04-26	0	5.07		2016-04-25	3.54	12.54	6.01	13.26	5.07		2016-04-25	7.36333	13.26	5.07		2014-04-26	0	0
	2014-04-27	0	4.44		2015-04-27	0	12.57		2016-04-26	0	6.01		2017-04-27	0	13.26		2018-04-27	0	5.07		2016-04-26	4.44	12.57	6.01	13.26	5.07		2016-04-26	7.67333	13.26	5.07		2014-04-27	0	0
	2014-04-28	0	4.44		2015-04-28	0	12.57		2016-04-27	0	6.01		2017-04-28	0	13.26		2018-04-28	0	5.07		2016-04-27	4.44	12.57	6.01	13.26	5.07		2016-04-27	7.67333	13.26	5.07		2014-04-28	0	0
	2014-04-29	0	4.44		2015-04-29	0	12.57		2016-04-28	0	6.01		2017-04-29	0	13.26		2018-04-29	0	5.07		2016-04-28	4.44	12.57	6.01	13.26	5.07		2016-04-28	7.67333	13.26	5.07		2014-04-29	0	0
	2014-04-30	0	4.44		2015-04-30	0	12.57		2016-04-29	0.08	6.09		2017-04-30	0	13.26		2018-04-30	0	5.07		2016-04-29	4.44	12.57	6.09	13.26	5.07		2016-04-29	7.7	13.26	5.07		2014-04-30	0	0
	2014-05-01	0	4.44		2015-05-01	0	12.57		2016-04-30	0.39	6.48		2017-05-01	0	13.26		2018-05-01	0.32	5.39		2016-04-30	4.44	12.57	6.48	13.26	5.07		2016-04-30	7.83	13.26	5.07		2014-05-01	0	0.32
	2014-05-02	0	4.44		2015-05-02	0	12.57		2016-05-01	0.62	7.1		2017-05-02	0	13.26		2018-05-02	0.3	5.69		2016-05-01	4.44	12.57	7.1	13.26	5.39		2016-05-01	8.03667	13.26	5.39		2014-05-02	0	0.3
	2014-05-03	0	4.44		2015-05-03	0	12.57		2016-05-02	0.08	7.18		2017-05-03	0	13.26		2018-05-03	0	5.69		2016-05-02	4.44	12.57	7.18	13.26	5.69		2016-05-02	8.06333	13.26	5.69		2014-05-03	0	0
	2014-05-04	0	4.44		2015-05-04	0.07	12.64		2016-05-03	0	7.18		2017-05-04	0	13.26		2018-05-04	0	5.69		2016-05-03	4.44	12.57	7.18	13.26	5.69		2016-05-03	8.06333	13.26	5.69		2014-05-04	0	0
	2014-05-05	0	4.44		2015-05-05	0.2	12.84		2016-05-04	0	7.18		2017-05-05	0	13.26		2018-05-05	0	5.69		2016-05-04	4.44	12.64	7.18	13.26	5.69		2016-05-04	8.08667	13.26	5.69		2014-05-05	0	0
	2014-05-06	0	4.44		2015-05-06	0	12.84		2016-05-05	0	7.18		2017-05-06	0	13.26		2018-05-06	0	5.69		2016-05-05	4.44	12.84	7.18	13.26	5.69		2016-05-05	8.15333	13.26	5.69		2014-05-06	0	0
	2014-05-07	0.01	4.45		2015-05-07	0	12.84		2016-05-06	0	7.18		2017-05-07	0	13.26		2018-05-07	0	5.69		2016-05-06	4.44	12.84	7.18	13.26	5.69		2016-05-06	8.15333	13.26	5.69		2014-05-07	0	0
	2014-05-08	0.04	4.49		2015-05-08	0.26	13.1		2016-05-07	0.09	7.27		2017-05-08	0.05	13.31		2018-05-08	0	5.69		2016-05-07	4.45	12.84	7.27	13.26	5.69		2016-05-07	8.18667	13.26	5.69		2014-05-08	0.05	0
	2014-05-09	0	4.49		2015-05-09	0.18	13.28		2016-05-08	0.28	7.55		2017-05-09	0.49	13.8		2018-05-09	0	5.69		2016-05-08	4.49	13.1	7.55	13.31	5.69		2016-05-08	8.38	13.31	5.69		2014-05-09	0.49	0
	2014-05-10	0	4.49		2015-05-10	0	13.28		2016-05-09	0	7.55		2017-05-10	0	13.8		2018-05-10	0	5.69		2016-05-09	4.49	13.28	7.55	13.8	5.69		2016-05-09	8.44	13.8	5.69		2014-05-10	0	0
	2014-05-11	0	4.49		2015-05-11	0	13.28		2016-05-10	0	7.55		2017-05-11	0	13.8		2018-05-11	0	5.69		2016-05-10	4.49	13.28	7.55	13.8	5.69		2016-05-10	8.44	13.8	5.69		2014-05-11	0	0
	2014-05-12	0	4.49		2015-05-12	0	13.28		2016-05-11	0	7.55		2017-05-12	0	13.8		2018-05-12	0	5.69		2016-05-11	4.49	13.28	7.55	13.8	5.69		2016-05-11	8.44	13.8	5.69		2014-05-12	0	0
	2014-05-13	0	4.49		2015-05-13	0	13.28		2016-05-12	0	7.55		2017-05-13	0	13.8		2018-05-13	0	5.69		2016-05-12	4.49	13.28	7.55	13.8	5.69		2016-05-12	8.44	13.8	5.69		2014-05-13	0	0
	2014-05-14	0	4.49		2015-05-14	0.2	13.48		2016-05-13	0	7.55		2017-05-14	0	13.8		2018-05-14	0	5.69		2016-05-13	4.49	13.28	7.55	13.8	5.69		2016-05-13	8.44	13.8	5.69		2014-05-14	0	0
	2014-05-15	0	4.49		2015-05-15	0.65	14.13		2016-05-14	0.01	7.56		2017-05-15	0	13.8		2018-05-15	0	5.69		2016-05-14	4.49	13.48	7.56	13.8	5.69		2016-05-14	8.51	13.8	5.69		2014-05-15	0	0
	2014-05-16	0	4.49		2015-05-16	0.1	14.23		2016-05-15	0	7.56		2017-05-16	0	13.8		2018-05-16	0	5.69		2016-05-15	4.49	14.13	7.56	13.8	5.69		2016-05-15	8.72667	13.8	5.69		2014-05-16	0	0
	2014-05-17	0	4.49		2015-05-17	0	14.23		2016-05-16	0.05	7.61		2017-05-17	0.17	13.97		2018-05-17	0	5.69		2016-05-16	4.49	14.23	7.61	13.8	5.69		2016-05-16	8.77667	13.8	5.69		2014-05-17	0.17	0
	2014-05-18	0	4.49		2015-05-18	0.01	14.24		2016-05-17	0.39	8		2017-05-18	0.08	14.05		2018-05-18	0	5.69		2016-05-17	4.49	14.23	8	13.97	5.69		2016-05-17	8.90667	13.97	5.69		2014-05-18	0.08	0
	2014-05-19	0	4.49		2015-05-19	0	14.24		2016-05-18	0.05	8.05		2017-05-19	0	14.05		2018-05-19	0	5.69		2016-05-18	4.49	14.24	8.05	14.05	5.69		2016-05-18	8.92667	14.05	5.69		2014-05-19	0	0
	2014-05-20	0	4.49		2015-05-20	0	14.24		2016-05-19	0	8.05		2017-05-20	0	14.05		2018-05-20	0	5.69		2016-05-19	4.49	14.24	8.05	14.05	5.69		2016-05-19	8.92667	14.05	5.69		2014-05-20	0	0
	2014-05-21	0	4.49		2015-05-21	0	14.24		2016-05-20	0	8.05		2017-05-21	0	14.05		2018-05-21	0	5.69		2016-05-20	4.49	14.24	8.05	14.05	5.69		2016-05-20	8.92667	14.05	5.69		2014-05-21	0	0
	2014-05-22	0	4.49		2015-05-22	0	14.24		2016-05-21	0	8.05		2017-05-22	0	14.05		2018-05-22	0	5.69		2016-05-21	4.49	14.24	8.05	14.05	5.69		2016-05-21	8.92667	14.05	5.69		2014-05-22	0	0
	2014-05-23	0	4.49		2015-05-23	0	14.24		2016-05-22	0	8.05		2017-05-23	0	14.05		2018-05-23	0	5.69		2016-05-22	4.49	14.24	8.05	14.05	5.69		2016-05-22	8.92667	14.05	5.69		2014-05-23	0	0
	2014-05-24	0	4.49		2015-05-24	0.03	14.27		2016-05-23	0	8.05		2017-05-24	0	14.05		2018-05-24	0	5.69		2016-05-23	4.49	14.24	8.05	14.05	5.69		2016-05-23	8.92667	14.05	5.69		2014-05-24	0	0
	2014-05-25	0	4.49		2015-05-25	0.1	14.37		2016-05-24	0	8.05		2017-05-25	0	14.05		2018-05-25	0	5.69		2016-05-24	4.49	14.27	8.05	14.05	5.69		2016-05-24	8.93667	14.05	5.69		2014-05-25	0	0
	2014-05-26	0	4.49		2015-05-26	0	14.37		2016-05-25	0	8.05		2017-05-26	0	14.05		2018-05-26	0	5.69		2016-05-25	4.49	14.37	8.05	14.05	5.69		2016-05-25	8.97	14.05	5.69		2014-05-26	0	0
	2014-05-27	0	4.49		2015-05-27	0	14.37		2016-05-26	0	8.05		2017-05-27	0	14.05		2018-05-27	0	5.69		2016-05-26	4.49	14.37	8.05	14.05	5.69		2016-05-26	8.97	14.05	5.69		2014-05-27	0	0
	2014-05-28	0	4.49		2015-05-28	0	14.37		2016-05-27	0	8.05		2017-05-28	0	14.05		2018-05-28	0	5.69		2016-05-27	4.49	14.37	8.05	14.05	5.69		2016-05-27	8.97	14.05	5.69		2014-05-28	0	0
	2014-05-29	0.07	4.56		2015-05-29	0	14.37		2016-05-28	0	8.05		2017-05-29	0	14.05		2018-05-29	0	5.69		2016-05-28	4.49	14.37	8.05	14.05	5.69		2016-05-28	8.97	14.05	5.69		2014-05-29	0	0
	2014-05-30	0	4.56		2015-05-30	0	14.37		2016-05-29	0	8.05		2017-05-30	0	14.05		2018-05-30	0	5.69		2016-05-29	4.56	14.37	8.05	14.05	5.69		2016-05-29	8.99333	14.05	5.69		2014-05-30	0	0
	2014-05-31	0	4.56		2015-05-31	0	14.37		2016-05-30	0	8.05		2017-05-31	0	14.05		2018-05-31	0	5.69		2016-05-30	4.56	14.37	8.05	14.05	5.69		2016-05-30	8.99333	14.05	5.69		2014-05-31	0	0
	2014-06-01	0	4.56		2015-06-01	0	14.37		2016-05-31	0	8.05		2017-06-01	0	14.05		2018-06-01	0	5.69		2016-05-31	4.56	14.37	8.05	14.05	5.69		2016-05-31	8.99333	14.05	5.69		2014-06-01	0	0
	2014-06-02	0	4.56		2015-06-02	0	14.37		2016-06-01	0	8.05		2017-06-02	0	14.05		2018-06-02	0	5.69		2016-06-01	4.56	14.37	8.05	14.05	5.69		2016-06-01	8.99333	14.05	5.69		2014-06-02	0	0
	2014-06-03	0	4.56		2015-06-03	0	14.37		2016-06-02	0	8.05		2017-06-03	0	14.05		2018-06-03	0	5.69		2016-06-02	4.56	14.37	8.05	14.05	5.69		2016-06-02	8.99333	14.05	5.69		2014-06-03	0	0
	2014-06-04	0	4.56		2015-06-04	0	14.37		2016-06-03	0	8.05		2017-06-04	0	14.05		2018-06-04	0	5.69		2016-06-03	4.56	14.37	8.05	14.05	5.69		2016-06-03	8.99333	14.05	5.69		2014-06-04	0	0
	2014-06-05	0	4.56		2015-06-05	1	15.37		2016-06-04	0	8.05		2017-06-05	0	14.05		2018-06-05	0	5.69		2016-06-04	4.56	14.37	8.05	14.05	5.69		2016-06-04	8.99333	14.05	5.69		2014-06-05	0	0
	2014-06-06	0	4.56		2015-06-06	0.07	15.44		2016-06-05	0	8.05		2017-06-06	0	14.05		2018-06-06	0	5.69		2016-06-05	4.56	15.37	8.05	14.05	5.69		2016-06-05	9.32667	14.05	5.69		2014-06-06	0	0
	2014-06-07	0	4.56		2015-06-07	0	15.44		2016-06-06	0	8.05		2017-06-07	0	14.05		2018-06-07	0	5.69		2016-06-06	4.56	15.44	8.05	14.05	5.69		2016-06-06	9.35	14.05	5.69		2014-06-07	0	0
	2014-06-08	0	4.56		2015-06-08	0	15.44		2016-06-07	0	8.05		2017-06-08	0	14.05		2018-06-08	0	5.69		2016-06-07	4.56	15.44	8.05	14.05	5.69		2016-06-07	9.35	14.05	5.69		2014-06-08	0	0
	2014-06-09	0	4.56		2015-06-09	0.01	15.45		2016-06-08	0	8.05		2017-06-09	0	14.05		2018-06-09	0	5.69		2016-06-08	4.56	15.44	8.05	14.05	5.69		2016-06-08	9.35	14.05	5.69		2014-06-09	0	0
	2014-06-10	0	4.56		2015-06-10	0.04	15.49		2016-06-09	0	8.05		2017-06-10	0	14.05		2018-06-10	0	5.69		2016-06-09	4.56	15.45	8.05	14.05	5.69		2016-06-09	9.35333	14.05	5.69		2014-06-10	0	0
	2014-06-11	0	4.56		2015-06-11	0	15.49		2016-06-10	0.27	8.32		2017-06-11	0	14.05		2018-06-11	0	5.69		2016-06-10	4.56	15.49	8.32	14.05	5.69		2016-06-10	9.45667	14.05	5.69		2014-06-11	0	0
	2014-06-12	0	4.56		2015-06-12	0	15.49		2016-06-11	0.01	8.33		2017-06-12	0	14.05		2018-06-12	0	5.69		2016-06-11	4.56	15.49	8.33	14.05	5.69		2016-06-11	9.46	14.05	5.69		2014-06-12	0	0
	2014-06-13	0	4.56		2015-06-13	0.02	15.51		2016-06-12	0	8.33		2017-06-13	0	14.05		2018-06-13	0	5.69		2016-06-12	4.56	15.49	8.33	14.05	5.69		2016-06-12	9.46	14.05	5.69		2014-06-13	0	0
	2014-06-14	0	4.56		2015-06-14	0	15.51		2016-06-13	0.02	8.35		2017-06-14	0	14.05		2018-06-14	0	5.69		2016-06-13	4.56	15.51	8.35	14.05	5.69		2016-06-13	9.47333	14.05	5.69		2014-06-14	0	0
	2014-06-15	0	4.56		2015-06-15	0	15.51		2016-06-14	0	8.35		2017-06-15	0	14.05		2018-06-15	0	5.69		2016-06-14	4.56	15.51	8.35	14.05	5.69		2016-06-14	9.47333	14.05	5.69		2014-06-15	0	0
	2014-06-16	0	4.56		2015-06-16	0	15.51		2016-06-15	0	8.35		2017-06-16	0	14.05		2018-06-16	0.38	6.07		2016-06-15	4.56	15.51	8.35	14.05	5.69		2016-06-15	9.47333	14.05	5.69		2014-06-16	0	0.38
	2014-06-17	0	4.56		2015-06-17	0	15.51		2016-06-16	0	8.35		2017-06-17	0	14.05		2018-06-17	0	6.07		2016-06-16	4.56	15.51	8.35	14.05	6.07		2016-06-16	9.47333	14.05	6.07		2014-06-17	0	0
	2014-06-18	0	4.56		2015-06-18	0	15.51		2016-06-17	0	8.35		2017-06-18	0	14.05		2018-06-18	0	6.07		2016-06-17	4.56	15.51	8.35	14.05	6.07		2016-06-17	9.47333	14.05	6.07		2014-06-18	0	0
	2014-06-19	0	4.56		2015-06-19	0	15.51		2016-06-18	0	8.35		2017-06-19	0.12	14.17		2018-06-19	0	6.07		2016-06-18	4.56	15.51	8.35	14.05	6.07		2016-06-18	9.47333	14.05	6.07		2014-06-19	0.12	0
	2014-06-20	0	4.56		2015-06-20	0	15.51		2016-06-19	0	8.35		2017-06-20	0	14.17		2018-06-20	0	6.07		2016-06-19	4.56	15.51	8.35	14.17	6.07		2016-06-19	9.47333	14.17	6.07		2014-06-20	0	0
	2014-06-21	0	4.56		2015-06-21	0	15.51		2016-06-20	0	8.35		2017-06-21	0	14.17		2018-06-21	0	6.07		2016-06-20	4.56	15.51	8.35	14.17	6.07		2016-06-20	9.47333	14.17	6.07		2014-06-21	0	0
	2014-06-22	0	4.56		2015-06-22	0	15.51		2016-06-21	0.45	8.8		2017-06-22	0	14.17		2018-06-22	0	6.07		2016-06-21	4.56	15.51	8.8	14.17	6.07		2016-06-21	9.62333	14.17	6.07		2014-06-22	0	0
	2014-06-23	0	4.56		2015-06-23	0	15.51		2016-06-22	0	8.8		2017-06-23	0	14.17		2018-06-23	0	6.07		2016-06-22	4.56	15.51	8.8	14.17	6.07		2016-06-22	9.62333	14.17	6.07		2014-06-23	0	0
	2014-06-24	0	4.56		2015-06-24	0	15.51		2016-06-23	0	8.8		2017-06-24	0	14.17		2018-06-24	0	6.07		2016-06-23	4.56	15.51	8.8	14.17	6.07		2016-06-23	9.62333	14.17	6.07		2014-06-24	0	0
	2014-06-25	0	4.56		2015-06-25	0	15.51		2016-06-24	0	8.8		2017-06-25	0.05	14.22		2018-06-25	0	6.07		2016-06-24	4.56	15.51	8.8	14.17	6.07		2016-06-24	9.62333	14.17	6.07		2014-06-25	0.05	0
	2014-06-26	0	4.56		2015-06-26	0	15.51		2016-06-25	0	8.8		2017-06-26	0	14.22		2018-06-26	0	6.07		2016-06-25	4.56	15.51	8.8	14.22	6.07		2016-06-25	9.62333	14.22	6.07		2014-06-26	0	0
	2014-06-27	0	4.56		2015-06-27	0.09	15.6		2016-06-26	0	8.8		2017-06-27	0	14.22		2018-06-27	0	6.07		2016-06-26	4.56	15.51	8.8	14.22	6.07		2016-06-26	9.62333	14.22	6.07		2014-06-27	0	0
	2014-06-28	0	4.56		2015-06-28	0.06	15.66		2016-06-27	0	8.8		2017-06-28	0	14.22		2018-06-28	0	6.07		2016-06-27	4.56	15.6	8.8	14.22	6.07		2016-06-27	9.65333	14.22	6.07		2014-06-28	0	0
	2014-06-29	0	4.56		2015-06-29	0.41	16.07		2016-06-28	0.39	9.19		2017-06-29	0	14.22		2018-06-29	0	6.07		2016-06-28	4.56	15.66	9.19	14.22	6.07		2016-06-28	9.80333	14.22	6.07		2014-06-29	0	0
	2014-06-30	0	4.56		2015-06-30	0	16.07		2016-06-29	0	9.19		2017-06-30	0	14.22		2018-06-30	0	6.07		2016-06-29	4.56	16.07	9.19	14.22	6.07		2016-06-29	9.94	14.22	6.07		2014-06-30	0	0
	2014-07-01	0	4.56		2015-07-01	0.06	16.13		2016-06-30	0.1	9.29		2017-07-01	0	14.22		2018-07-01	0	6.07		2016-06-30	4.56	16.07	9.29	14.22	6.07		2016-06-30	9.97333	14.22	6.07		2014-07-01	0	0
	2014-07-02	0	4.56		2015-07-02	0.06	16.19		2016-07-01	0.03	9.32		2017-07-02	0	14.22		2018-07-02	0	6.07		2016-07-01	4.56	16.13	9.32	14.22	6.07		2016-07-01	10.0033	14.22	6.07		2014-07-02	0	0
	2014-07-03	0.04	4.6		2015-07-03	0.53	16.72		2016-07-02	0.31	9.63		2017-07-03	0	14.22		2018-07-03	0	6.07		2016-07-02	4.56	16.19	9.63	14.22	6.07		2016-07-02	10.1267	14.22	6.07		2014-07-03	0	0
	2014-07-04	1.89	6.49		2015-07-04	0.19	16.91		2016-07-03	0	9.63		2017-07-04	0	14.22		2018-07-04	0	6.07		2016-07-03	4.6	16.72	9.63	14.22	6.07		2016-07-03	10.3167	14.22	6.07		2014-07-04	0	0
	2014-07-05	0.03	6.52		2015-07-05	0.53	17.44		2016-07-04	0	9.63		2017-07-05	0	14.22		2018-07-05	0	6.07		2016-07-04	6.49	16.91	9.63	14.22	6.07		2016-07-04	11.01	14.22	6.07		2014-07-05	0	0
	2014-07-06	0	6.52		2015-07-06	0.07	17.51		2016-07-05	0	9.63		2017-07-06	0	14.22		2018-07-06	0	6.07		2016-07-05	6.52	17.44	9.63	14.22	6.07		2016-07-05	11.1967	14.22	6.07		2014-07-06	0	0
	2014-07-07	0.68	7.2		2015-07-07	0.25	17.76		2016-07-06	0	9.63		2017-07-07	0.02	14.24		2018-07-07	0.34	6.41		2016-07-06	6.52	17.51	9.63	14.22	6.07		2016-07-06	11.22	14.22	6.07		2014-07-07	0.02	0.34
	2014-07-08	0	7.2		2015-07-08	0	17.76		2016-07-07	0	9.63		2017-07-08	0.01	14.25		2018-07-08	0.1	6.51		2016-07-07	7.2	17.76	9.63	14.24	6.41		2016-07-07	11.53	14.24	6.41		2014-07-08	0.01	0.1
	2014-07-09	0.04	7.24		2015-07-09	0	17.76		2016-07-08	0	9.63		2017-07-09	0.03	14.28		2018-07-09	0.16	6.67		2016-07-08	7.2	17.76	9.63	14.25	6.51		2016-07-08	11.53	14.25	6.51		2014-07-09	0.03	0.16
	2014-07-10	0	7.24		2015-07-10	0	17.76		2016-07-09	0	9.63		2017-07-10	0	14.28		2018-07-10	0.02	6.69		2016-07-09	7.24	17.76	9.63	14.28	6.67		2016-07-09	11.5433	14.28	6.67		2014-07-10	0	0.02
	2014-07-11	0	7.24		2015-07-11	0.01	17.77		2016-07-10	0	9.63		2017-07-11	0.19	14.47		2018-07-11	0.09	6.78		2016-07-10	7.24	17.76	9.63	14.28	6.69		2016-07-10	11.5433	14.28	6.69		2014-07-11	0.19	0.09
	2014-07-12	0.09	7.33		2015-07-12	0	17.77		2016-07-11	0	9.63		2017-07-12	0	14.47		2018-07-12	0.19	6.97		2016-07-11	7.24	17.77	9.63	14.47	6.78		2016-07-11	11.5467	14.47	6.78		2014-07-12	0	0.19
	2014-07-13	0.01	7.34		2015-07-13	0	17.77		2016-07-12	0	9.63		2017-07-13	0.04	14.51		2018-07-13	0	6.97		2016-07-12	7.33	17.77	9.63	14.47	6.97		2016-07-12	11.5767	14.47	6.97		2014-07-13	0.04	0
	2014-07-14	0.02	7.36		2015-07-14	0.01	17.78		2016-07-13	0	9.63		2017-07-14	0	14.51		2018-07-14	0.07	7.04		2016-07-13	7.34	17.77	9.63	14.51	6.97		2016-07-13	11.58	14.51	6.97		2014-07-14	0	0.07
	2014-07-15	0.08	7.44		2015-07-15	0	17.78		2016-07-14	0	9.63		2017-07-15	0.06	14.57		2018-07-15	0.28	7.32		2016-07-14	7.36	17.78	9.63	14.51	7.04		2016-07-14	11.59	14.51	7.04		2014-07-15	0.06	0.28
	2014-07-16	0	7.44		2015-07-16	0	17.78		2016-07-15	0	9.63		2017-07-16	0	14.57		2018-07-16	0.1	7.42		2016-07-15	7.44	17.78	9.63	14.57	7.32		2016-07-15	11.6167	14.57	7.32		2014-07-16	0	0.1
	2014-07-17	0	7.44		2015-07-17	0	17.78		2016-07-16	0	9.63		2017-07-17	0	14.57		2018-07-17	0	7.42		2016-07-16	7.44	17.78	9.63	14.57	7.42		2016-07-16	11.6167	14.57	7.42		2014-07-17	0	0
	2014-07-18	0	7.44		2015-07-18	0.79	18.57		2016-07-17	0	9.63		2017-07-18	0.56	15.13		2018-07-18	0.23	7.65		2016-07-17	7.44	17.78	9.63	14.57	7.42		2016-07-17	11.6167	14.57	7.42		2014-07-18	0.56	0.23
	2014-07-19	0	7.44		2015-07-19	0.09	18.66		2016-07-18	0	9.63		2017-07-19	0.1	15.23		2018-07-19	0.18	7.83		2016-07-18	7.44	18.57	9.63	15.13	7.65		2016-07-18	11.88	15.13	7.65		2014-07-19	0.1	0.18
	2014-07-20	0	7.44		2015-07-20	0	18.66		2016-07-19	0.25	9.88		2017-07-20	0.13	15.36		2018-07-20	0	7.83		2016-07-19	7.44	18.66	9.88	15.23	7.83		2016-07-19	11.9933	15.23	7.83		2014-07-20	0.13	0
	2014-07-21	0	7.44		2015-07-21	0	18.66		2016-07-20	0.16	10.04		2017-07-21	0.17	15.53		2018-07-21	0.02	7.85		2016-07-20	7.44	18.66	10.04	15.36	7.83		2016-07-20	12.0467	15.36	7.83		2014-07-21	0.17	0.02
	2014-07-22	0	7.44		2015-07-22	0	18.66		2016-07-21	0.01	10.05		2017-07-22	0	15.53		2018-07-22	0	7.85		2016-07-21	7.44	18.66	10.05	15.53	7.85		2016-07-21	12.05	15.53	7.85		2014-07-22	0	0
	2014-07-23	0	7.44		2015-07-23	0	18.66		2016-07-22	0	10.05		2017-07-23	1.79	17.32		2018-07-23	0	7.85		2016-07-22	7.44	18.66	10.05	15.53	7.85		2016-07-22	12.05	15.53	7.85		2014-07-23	1.79	0
	2014-07-24	0.03	7.47		2015-07-24	0	18.66		2016-07-23	0.1	10.15		2017-07-24	0.77	18.09		2018-07-24	0	7.85		2016-07-23	7.44	18.66	10.15	17.32	7.85		2016-07-23	12.0833	17.32	7.85		2014-07-24	0.77	0
	2014-07-25	0	7.47		2015-07-25	0	18.66		2016-07-24	0	10.15		2017-07-25	0.1	18.19		2018-07-25	0.08	7.93		2016-07-24	7.47	18.66	10.15	18.09	7.85		2016-07-24	12.0933	18.09	7.85		2014-07-25	0.1	0.08
	2014-07-26	0.68	8.15		2015-07-26	0	18.66		2016-07-25	0.65	10.8		2017-07-26	0	18.19		2018-07-26	0	7.93		2016-07-25	7.47	18.66	10.8	18.19	7.93		2016-07-25	12.31	18.19	7.93		2014-07-26	0	0
	2014-07-27	0.07	8.22		2015-07-27	0	18.66		2016-07-26	0.03	10.83		2017-07-27	0.15	18.34		2018-07-27	1.11	9.04		2016-07-26	8.15	18.66	10.83	18.19	7.93		2016-07-26	12.5467	18.19	7.93		2014-07-27	0.15	1.11
	2014-07-28	0.01	8.23		2015-07-28	0	18.66		2016-07-27	0	10.83		2017-07-28	0.31	18.65		2018-07-28	0.05	9.09		2016-07-27	8.22	18.66	10.83	18.34	9.04		2016-07-27	12.57	18.34	9.04		2014-07-28	0.31	0.05
	2014-07-29	0	8.23		2015-07-29	0	18.66		2016-07-28	0	10.83		2017-07-29	0	18.65		2018-07-29	0.12	9.21		2016-07-28	8.23	18.66	10.83	18.65	9.09		2016-07-28	12.5733	18.65	9.09		2014-07-29	0	0.12
	2014-07-30	0	8.23		2015-07-30	0.02	18.68		2016-07-29	0.18	11.01		2017-07-30	0	18.65		2018-07-30	0	9.21		2016-07-29	8.23	18.66	11.01	18.65	9.21		2016-07-29	12.6333	18.65	9.21		2014-07-30	0	0
	2014-07-31	0.65	8.88		2015-07-31	0.16	18.84		2016-07-30	0.53	11.54		2017-07-31	0.05	18.7		2018-07-31	0	9.21		2016-07-30	8.23	18.68	11.54	18.65	9.21		2016-07-30	12.8167	18.65	9.21		2014-07-31	0.05	0
	2014-08-01	0.43	9.31		2015-08-01	0	18.84		2016-07-31	0.34	11.88		2017-08-01	0.01	18.71		2018-08-01	0.97	10.18		2016-07-31	8.88	18.84	11.88	18.7	9.21		2016-07-31	13.2	18.7	9.21		2014-08-01	0.01	0.97
	2014-08-02	0.23	9.54		2015-08-02	0.02	18.86		2016-08-01	0.15	12.03		2017-08-02	0	18.71		2018-08-02	0.14	10.32		2016-08-01	9.31	18.84	12.03	18.71	10.18		2016-08-01	13.3933	18.71	10.18		2014-08-02	0	0.14
	2014-08-03	0.48	10.02		2015-08-03	0	18.86		2016-08-02	1.11	13.14		2017-08-03	0	18.71		2018-08-03	0	10.32		2016-08-02	9.54	18.86	13.14	18.71	10.32		2016-08-02	13.8467	18.71	10.32		2014-08-03	0	0
	2014-08-04	0	10.02		2015-08-04	0	18.86		2016-08-03	0.61	13.75		2017-08-04	1.05	19.76		2018-08-04	0	10.32		2016-08-03	10.02	18.86	13.75	18.71	10.32		2016-08-03	14.21	18.71	10.32		2014-08-04	1.05	0
	2014-08-05	0	10.02		2015-08-05	0	18.86		2016-08-04	0.41	14.16		2017-08-05	0.25	20.01		2018-08-05	0	10.32		2016-08-04	10.02	18.86	14.16	19.76	10.32		2016-08-04	14.3467	19.76	10.32		2014-08-05	0.25	0
	2014-08-06	0	10.02		2015-08-06	0	18.86		2016-08-05	0.01	14.17		2017-08-06	0	20.01		2018-08-06	0	10.32		2016-08-05	10.02	18.86	14.17	20.01	10.32		2016-08-05	14.35	20.01	10.32		2014-08-06	0	0
	2014-08-07	0	10.02		2015-08-07	1.57	20.43		2016-08-06	0.02	14.19		2017-08-07	0	20.01		2018-08-07	0	10.32		2016-08-06	10.02	18.86	14.19	20.01	10.32		2016-08-06	14.3567	20.01	10.32		2014-08-07	0	0
	2014-08-08	0	10.02		2015-08-08	0.04	20.47		2016-08-07	0	14.19		2017-08-08	0	20.01		2018-08-08	0	10.32		2016-08-07	10.02	20.43	14.19	20.01	10.32		2016-08-07	14.88	20.01	10.32		2014-08-08	0	0
	2014-08-09	0	10.02		2015-08-09	0	20.47		2016-08-08	0	14.19		2017-08-09	0	20.01		2018-08-09	0.75	11.07		2016-08-08	10.02	20.47	14.19	20.01	10.32		2016-08-08	14.8933	20.01	10.32		2014-08-09	0	0.75
	2014-08-10	0	10.02		2015-08-10	0	20.47		2016-08-09	0	14.19		2017-08-10	0.59	20.6		2018-08-10	0.01	11.08		2016-08-09	10.02	20.47	14.19	20.01	11.07		2016-08-09	14.8933	20.01	11.07		2014-08-10	0.59	0.01
	2014-08-11	0.48	10.5		2015-08-11	0.14	20.61		2016-08-10	0.01	14.2		2017-08-11	0	20.6		2018-08-11	0.22	11.3		2016-08-10	10.02	20.47	14.2	20.6	11.08		2016-08-10	14.8967	20.6	11.08		2014-08-11	0	0.22
	2014-08-12	0.77	11.27		2015-08-12	0.25	20.86		2016-08-11	0.37	14.57		2017-08-12	0.17	20.77		2018-08-12	0.01	11.31		2016-08-11	10.5	20.61	14.57	20.6	11.3		2016-08-11	15.2267	20.6	11.3		2014-08-12	0.17	0.01
	2014-08-13	0.94	12.21		2015-08-13	0	20.86		2016-08-12	0.52	15.09		2017-08-13	0.29	21.06		2018-08-13	0.59	11.9		2016-08-12	11.27	20.86	15.09	20.77	11.31		2016-08-12	15.74	20.77	11.31		2014-08-13	0.29	0.59
	2014-08-14	0	12.21		2015-08-14	0	20.86		2016-08-13	0	15.09		2017-08-14	0.04	21.1		2018-08-14	1.31	13.21		2016-08-13	12.21	20.86	15.09	21.06	11.9		2016-08-13	16.0533	21.06	11.9		2014-08-14	0.04	1.31
	2014-08-15	0.21	12.42		2015-08-15	0	20.86		2016-08-14	0	15.09		2017-08-15	0	21.1		2018-08-15	0	13.21		2016-08-14	12.21	20.86	15.09	21.1	13.21		2016-08-14	16.0533	21.1	13.21		2014-08-15	0	0
	2014-08-16	0	12.42		2015-08-16	0	20.86		2016-08-15	0.02	15.11		2017-08-16	0	21.1		2018-08-16	0.01	13.22		2016-08-15	12.42	20.86	15.11	21.1	13.21		2016-08-15	16.13	21.1	13.21		2014-08-16	0	0.01
	2014-08-17	0.17	12.59		2015-08-17	0	20.86		2016-08-16	0.01	15.12		2017-08-17	0	21.1		2018-08-17	0.06	13.28		2016-08-16	12.42	20.86	15.12	21.1	13.22		2016-08-16	16.1333	21.1	13.22		2014-08-17	0	0.06
	2014-08-18	0.12	12.71		2015-08-18	0	20.86		2016-08-17	0.03	15.15		2017-08-18	0	21.1		2018-08-18	0	13.28		2016-08-17	12.59	20.86	15.15	21.1	13.28		2016-08-17	16.2	21.1	13.28		2014-08-18	0	0
	2014-08-19	0.78	13.49		2015-08-19	0	20.86		2016-08-18	0.04	15.19		2017-08-19	0	21.1		2018-08-19	0	13.28		2016-08-18	12.71	20.86	15.19	21.1	13.28		2016-08-18	16.2533	21.1	13.28		2014-08-19	0	0
	2014-08-20	0	13.49		2015-08-20	0	20.86		2016-08-19	0.04	15.23		2017-08-20	0.19	21.29		2018-08-20	0	13.28		2016-08-19	13.49	20.86	15.23	21.1	13.28		2016-08-19	16.5267	21.1	13.28		2014-08-20	0.19	0
	2014-08-21	0.28	13.77		2015-08-21	0	20.86		2016-08-20	0.25	15.48		2017-08-21	0	21.29		2018-08-21	0.11	13.39		2016-08-20	13.49	20.86	15.48	21.29	13.28		2016-08-20	16.61	21.29	13.28		2014-08-21	0	0.11
	2014-08-22	0.15	13.92		2015-08-22	0	20.86		2016-08-21	0	15.48		2017-08-22	0.04	21.33		2018-08-22	0.06	13.45		2016-08-21	13.77	20.86	15.48	21.29	13.39		2016-08-21	16.7033	21.29	13.39		2014-08-22	0.04	0.06
	2014-08-23	0	13.92		2015-08-23	0.01	20.87		2016-08-22	0	15.48		2017-08-23	0	21.33		2018-08-23	0.14	13.59		2016-08-22	13.92	20.86	15.48	21.33	13.45		2016-08-22	16.7533	21.33	13.45		2014-08-23	0	0.14
	2014-08-24	0	13.92		2015-08-24	0	20.87		2016-08-23	0.01	15.49		2017-08-24	0.39	21.72		2018-08-24	0.19	13.78		2016-08-23	13.92	20.87	15.49	21.33	13.59		2016-08-23	16.76	21.33	13.59		2014-08-24	0.39	0.19
	2014-08-25	0	13.92		2015-08-25	0.68	21.55		2016-08-24	0.04	15.53		2017-08-25	0	21.72		2018-08-25	0.58	14.36		2016-08-24	13.92	20.87	15.53	21.72	13.78		2016-08-24	16.7733	21.72	13.78		2014-08-25	0	0.58
	2014-08-26	0.08	14		2015-08-26	0	21.55		2016-08-25	0.34	15.87		2017-08-26	0	21.72		2018-08-26	0	14.36		2016-08-25	13.92	21.55	15.87	21.72	14.36		2016-08-25	17.1133	21.72	14.36		2014-08-26	0	0
	2014-08-27	0.19	14.19		2015-08-27	0.14	21.69		2016-08-26	1.41	17.28		2017-08-27	0	21.72		2018-08-27	0	14.36		2016-08-26	14	21.55	17.28	21.72	14.36		2016-08-26	17.61	21.72	14.36		2014-08-27	0	0
	2014-08-28	0	14.19		2015-08-28	0	21.69		2016-08-27	0.94	18.22		2017-08-28	0	21.72		2018-08-28	0	14.36		2016-08-27	14.19	21.69	18.22	21.72	14.36		2016-08-27	18.0333	21.72	14.36		2014-08-28	0	0
	2014-08-29	0	14.19		2015-08-29	0	21.69		2016-08-28	0	18.22		2017-08-29	0.27	21.99		2018-08-29	0	14.36		2016-08-28	14.19	21.69	18.22	21.72	14.36		2016-08-28	18.0333	21.72	14.36		2014-08-29	0.27	0
	2014-08-30	0	14.19		2015-08-30	0.17	21.86		2016-08-29	0	18.22		2017-08-30	0	21.99		2018-08-30	0	14.36		2016-08-29	14.19	21.69	18.22	21.99	14.36		2016-08-29	18.0333	21.99	14.36		2014-08-30	0	0
	2014-08-31	0	14.19		2015-08-31	0	21.86		2016-08-30	0	18.22		2017-08-31	0	21.99		2018-08-31	0	14.36		2016-08-30	14.19	21.86	18.22	21.99	14.36		2016-08-30	18.09	21.99	14.36		2014-08-31	0	0
	2014-09-01	0	14.19		2015-09-01	0	21.86		2016-08-31	0	18.22		2017-09-01	0	21.99		2018-09-01	0.01	14.37		2016-08-31	14.19	21.86	18.22	21.99	14.36		2016-08-31	18.09	21.99	14.36		2014-09-01	0	0.01
	2014-09-02	0	14.19		2015-09-02	0	21.86		2016-09-01	0.06	18.28		2017-09-02	0	21.99		2018-09-02	0.63	15		2016-09-01	14.19	21.86	18.28	21.99	14.37		2016-09-01	18.11	21.99	14.37		2014-09-02	0	0.63
									2016-09-02	0	18.28										2016-09-02	14.19	21.86	1900-01-18 06:43:12	21.99	15		2016-09-02	18.11	21.99	15

## Sheet: original data (NCEI download)
NAME	DATE	PRCP	SNOW	SNWD
FLAGSTAFF AIRPORT, AZ US	2013-12-01	0	0	0
FLAGSTAFF AIRPORT, AZ US	2013-12-02	0	0	0
FLAGSTAFF AIRPORT, AZ US	2013-12-03	0	0	0
FLAGSTAFF AIRPORT, AZ US	2013-12-04	0.31	3	0
FLAGSTAFF AIRPORT, AZ US	2013-12-05	0	0	3.1
FLAGSTAFF AIRPORT, AZ US	2013-12-06	0	0	2
FLAGSTAFF AIRPORT, AZ US	2013-12-07	0.25	4.9	2
FLAGSTAFF AIRPORT, AZ US	2013-12-08	0.09	1.8	9
FLAGSTAFF AIRPORT, AZ US	2013-12-09	0	0	7.9
FLAGSTAFF AIRPORT, AZ US	2013-12-10	0	0	7.1
FLAGSTAFF AIRPORT, AZ US	2013-12-11	0	0	7.1
FLAGSTAFF AIRPORT, AZ US	2013-12-12	0	0	7.1
FLAGSTAFF AIRPORT, AZ US	2013-12-13	0	0	7.1
FLAGSTAFF AIRPORT, AZ US	2013-12-14	0	0	7.1
FLAGSTAFF AIRPORT, AZ US	2013-12-15	0	0	5.9
FLAGSTAFF AIRPORT, AZ US	2013-12-16	0	0	5.1
FLAGSTAFF AIRPORT, AZ US	2013-12-17	0	0	5.1
FLAGSTAFF AIRPORT, AZ US	2013-12-18	0	0	5.1
FLAGSTAFF AIRPORT, AZ US	2013-12-19	0.38	4	3.9
FLAGSTAFF AIRPORT, AZ US	2013-12-20	0.32	4	11.8
FLAGSTAFF AIRPORT, AZ US	2013-12-21	0	0.2	9.1
FLAGSTAFF AIRPORT, AZ US	2013-12-22	0	0	7.9
FLAGSTAFF AIRPORT, AZ US	2013-12-23	0	0	7.1
FLAGSTAFF AIRPORT, AZ US	2013-12-24	0	0	5.9
FLAGSTAFF AIRPORT, AZ US	2013-12-25	0	0	5.1
FLAGSTAFF AIRPORT, AZ US	2013-12-26	0	0	5.1
FLAGSTAFF AIRPORT, AZ US	2013-12-27	0	0	3.9
FLAGSTAFF AIRPORT, AZ US	2013-12-28	0	0	3.9
FLAGSTAFF AIRPORT, AZ US	2013-12-29	0	0	3.9
FLAGSTAFF AIRPORT, AZ US	2013-12-30	0	0	3.9
FLAGSTAFF AIRPORT, AZ US	2013-12-31	0	0	3.9
FLAGSTAFF AIRPORT, AZ US	2014-01-01	0	0	3.1
FLAGSTAFF AIRPORT, AZ US	2014-01-02	0	0	3.1
FLAGSTAFF AIRPORT, AZ US	2014-01-03	0	0	2
FLAGSTAFF AIRPORT, AZ US	2014-01-04	0	0	1.2
FLAGSTAFF AIRPORT, AZ US	2014-01-05	0	0	1.2
FLAGSTAFF AIRPORT, AZ US	2014-01-06	0	0	0
FLAGSTAFF AIRPORT, AZ US	2014-01-07	0	0	0
FLAGSTAFF AIRPORT, AZ US	2014-01-08	0	0	0
FLAGSTAFF AIRPORT, AZ US	2014-01-09	0	0	0
FLAGSTAFF AIRPORT, AZ US	2014-01-10	0	0	0
FLAGSTAFF AIRPORT, AZ US	2014-01-11	0	0	0
FLAGSTAFF AIRPORT, AZ US	2014-01-12	0	0	0
FLAGSTAFF AIRPORT, AZ US	2014-01-13	0	0	0
FLAGSTAFF AIRPORT, AZ US	2014-01-14	0	0	0
FLAGSTAFF AIRPORT, AZ US	2014-01-15	0	0	0
FLAGSTAFF AIRPORT, AZ US	2014-01-16	0	0	0
FLAGSTAFF AIRPORT, AZ US	2014-01-17	0	0	0
FLAGSTAFF AIRPORT, AZ US	2014-01-18	0	0	0
FLAGSTAFF AIRPORT, AZ US	2014-01-19	0	0	0
FLAGSTAFF AIRPORT, AZ US	2014-01-20	0	0	0
FLAGSTAFF AIRPORT, AZ US	2014-01-21	0	0	0
FLAGSTAFF AIRPORT, AZ US	2014-01-22	0	0	0
FLAGSTAFF AIRPORT, AZ US	2014-01-23	0	0	0
FLAGSTAFF AIRPORT, AZ US	2014-01-24	0	0	0
FLAGSTAFF AIRPORT, AZ US	2014-01-25	0	0	0
FLAGSTAFF AIRPORT, AZ US	2014-01-26	0	0	0
FLAGSTAFF AIRPORT, AZ US	2014-01-27	0	0	0
FLAGSTAFF AIRPORT, AZ US	2014-01-28	0	0	0
FLAGSTAFF AIRPORT, AZ US	2014-01-29	0	0	0
FLAGSTAFF AIRPORT, AZ US	2014-01-30	0	0	0
FLAGSTAFF AIRPORT, AZ US	2014-01-31	0.17	1.5	0
FLAGSTAFF AIRPORT, AZ US	2014-02-01	0.02	0.2	1.2
FLAGSTAFF AIRPORT, AZ US	2014-02-02	0	0	1.2
FLAGSTAFF AIRPORT, AZ US	2014-02-03	0.01	0.4	0
FLAGSTAFF AIRPORT, AZ US	2014-02-04	0	0	0
FLAGSTAFF AIRPORT, AZ US	2014-02-05	0	0	0
FLAGSTAFF AIRPORT, AZ US	2014-02-06	0.02	0.4	0
FLAGSTAFF AIRPORT, AZ US	2014-02-07	0.07	1.1	1.2
FLAGSTAFF AIRPORT, AZ US	2014-02-08	0	0	0
FLAGSTAFF AIRPORT, AZ US	2014-02-09	0	0	0
FLAGSTAFF AIRPORT, AZ US	2014-02-10	0	0	0
FLAGSTAFF AIRPORT, AZ US	2014-02-11	0	0	0
FLAGSTAFF AIRPORT, AZ US	2014-02-12	0	0	0
FLAGSTAFF AIRPORT, AZ US	2014-02-13	0	0	0
FLAGSTAFF AIRPORT, AZ US	2014-02-14	0	0	0
FLAGSTAFF AIRPORT, AZ US	2014-02-15	0	0	0
FLAGSTAFF AIRPORT, AZ US	2014-02-16	0	0	0
FLAGSTAFF AIRPORT, AZ US	2014-02-17	0	0	0
FLAGSTAFF AIRPORT, AZ US	2014-02-18	0	0	0
FLAGSTAFF AIRPORT, AZ US	2014-02-19	0	0	0
FLAGSTAFF AIRPORT, AZ US	2014-02-20	0	0	0
FLAGSTAFF AIRPORT, AZ US	2014-02-21	0	0	0
FLAGSTAFF AIRPORT, AZ US	2014-02-22	0	0	0
FLAGSTAFF AIRPORT, AZ US	2014-02-23	0	0	0
FLAGSTAFF AIRPORT, AZ US	2014-02-24	0	0	0
FLAGSTAFF AIRPORT, AZ US	2014-02-25	0	0	0
FLAGSTAFF AIRPORT, AZ US	2014-02-26	0	0	0
FLAGSTAFF AIRPORT, AZ US	2014-02-27	0	0	0
FLAGSTAFF AIRPORT, AZ US	2014-02-28	0.31	0	0
FLAGSTAFF AIRPORT, AZ US	2014-03-01	1.09	0.7	0
FLAGSTAFF AIRPORT, AZ US	2014-03-02	0.04	0.4	0
FLAGSTAFF AIRPORT, AZ US	2014-03-03	0	0	0
FLAGSTAFF AIRPORT, AZ US	2014-03-04	0	0	0
FLAGSTAFF AIRPORT, AZ US	2014-03-05	0	0	0
FLAGSTAFF AIRPORT, AZ US	2014-03-06	0	0	0
FLAGSTAFF AIRPORT, AZ US	2014-03-07	0	0	0
FLAGSTAFF AIRPORT, AZ US	2014-03-08	0	0	0
FLAGSTAFF AIRPORT, AZ US	2014-03-09	0	0	0
FLAGSTAFF AIRPORT, AZ US	2014-03-10	0	0	0
FLAGSTAFF AIRPORT, AZ US	2014-03-11	0	0	0
FLAGSTAFF AIRPORT, AZ US	2014-03-12	0	0	0
FLAGSTAFF AIRPORT, AZ US	2014-03-13	0	0	0
FLAGSTAFF AIRPORT, AZ US	2014-03-14	0.01	0	0
FLAGSTAFF AIRPORT, AZ US	2014-03-15	0	0	0
FLAGSTAFF AIRPORT, AZ US	2014-03-16	0	0	0
FLAGSTAFF AIRPORT, AZ US	2014-03-17	0	0	0
FLAGSTAFF AIRPORT, AZ US	2014-03-18	0	0	0
FLAGSTAFF AIRPORT, AZ US	2014-03-19	0	0	0
FLAGSTAFF AIRPORT, AZ US	2014-03-20	0	0	0
FLAGSTAFF AIRPORT, AZ US	2014-03-21	0	0	0
FLAGSTAFF AIRPORT, AZ US	2014-03-22	0	0	0
FLAGSTAFF AIRPORT, AZ US	2014-03-23	0	0	0
FLAGSTAFF AIRPORT, AZ US	2014-03-24	0	0	0
FLAGSTAFF AIRPORT, AZ US	2014-03-25	0	0	0
FLAGSTAFF AIRPORT, AZ US	2014-03-26	0.1	0.3	0
FLAGSTAFF AIRPORT, AZ US	2014-03-27	0	0	0
FLAGSTAFF AIRPORT, AZ US	2014-03-28	0	0	0
FLAGSTAFF AIRPORT, AZ US	2014-03-29	0	0	0
FLAGSTAFF AIRPORT, AZ US	2014-03-30	0	0	0
FLAGSTAFF AIRPORT, AZ US	2014-03-31	0	0	0
FLAGSTAFF AIRPORT, AZ US	2014-04-01	0	0	0
FLAGSTAFF AIRPORT, AZ US	2014-04-02	0.3	3.6	0
FLAGSTAFF AIRPORT, AZ US	2014-04-03	0	0	2
FLAGSTAFF AIRPORT, AZ US	2014-04-04	0	0	0
FLAGSTAFF AIRPORT, AZ US	2014-04-05	0.03	0	0
FLAGSTAFF AIRPORT, AZ US	2014-04-06	0	0	0
FLAGSTAFF AIRPORT, AZ US	2014-04-07	0	0	0
FLAGSTAFF AIRPORT, AZ US	2014-04-08	0	0	0
FLAGSTAFF AIRPORT, AZ US	2014-04-09	0	0	0
FLAGSTAFF AIRPORT, AZ US	2014-04-10	0	0	0
FLAGSTAFF AIRPORT, AZ US	2014-04-11	0	0	0
FLAGSTAFF AIRPORT, AZ US	2014-04-12	0	0	0
FLAGSTAFF AIRPORT, AZ US	2014-04-13	0	0	0
FLAGSTAFF AIRPORT, AZ US	2014-04-14	0	0	0
FLAGSTAFF AIRPORT, AZ US	2014-04-15	0	0	0
FLAGSTAFF AIRPORT, AZ US	2014-04-16	0	0	0
FLAGSTAFF AIRPORT, AZ US	2014-04-17	0	0	0
FLAGSTAFF AIRPORT, AZ US	2014-04-18	0.02	0	0
FLAGSTAFF AIRPORT, AZ US	2014-04-19	0	0	0
FLAGSTAFF AIRPORT, AZ US	2014-04-20	0	0	0
FLAGSTAFF AIRPORT, AZ US	2014-04-21	0	0	0
FLAGSTAFF AIRPORT, AZ US	2014-04-22	0	0	0
FLAGSTAFF AIRPORT, AZ US	2014-04-23	0	0	0
FLAGSTAFF AIRPORT, AZ US	2014-04-24	0	0	0
FLAGSTAFF AIRPORT, AZ US	2014-04-25	0	0	0
FLAGSTAFF AIRPORT, AZ US	2014-04-26	0.9	5.5	0
FLAGSTAFF AIRPORT, AZ US	2014-04-27	0	0	0
FLAGSTAFF AIRPORT, AZ US	2014-04-28	0	0	0
FLAGSTAFF AIRPORT, AZ US	2014-04-29	0	0	0
FLAGSTAFF AIRPORT, AZ US	2014-04-30	0	0	0
FLAGSTAFF AIRPORT, AZ US	2014-05-01	0	0	0
FLAGSTAFF AIRPORT, AZ US	2014-05-02	0	0	0
FLAGSTAFF AIRPORT, AZ US	2014-05-03	0	0	0
FLAGSTAFF AIRPORT, AZ US	2014-05-04	0	0	0
FLAGSTAFF AIRPORT, AZ US	2014-05-05	0	0	0
FLAGSTAFF AIRPORT, AZ US	2014-05-06	0	0	0
FLAGSTAFF AIRPORT, AZ US	2014-05-07	0.01	0	0
FLAGSTAFF AIRPORT, AZ US	2014-05-08	0.04	0.4	0
FLAGSTAFF AIRPORT, AZ US	2014-05-09	0	0	0
FLAGSTAFF AIRPORT, AZ US	2014-05-10	0	0	0
FLAGSTAFF AIRPORT, AZ US	2014-05-11	0	0	0
FLAGSTAFF AIRPORT, AZ US	2014-05-12	0	0	0
FLAGSTAFF AIRPORT, AZ US	2014-05-13	0	0	0
FLAGSTAFF AIRPORT, AZ US	2014-05-14	0	0	0
FLAGSTAFF AIRPORT, AZ US	2014-05-15	0	0	0
FLAGSTAFF AIRPORT, AZ US	2014-05-16	0	0	0
FLAGSTAFF AIRPORT, AZ US	2014-05-17	0	0	0
FLAGSTAFF AIRPORT, AZ US	2014-05-18	0	0	0
FLAGSTAFF AIRPORT, AZ US	2014-05-19	0	0	0
FLAGSTAFF AIRPORT, AZ US	2014-05-20	0	0	0
FLAGSTAFF AIRPORT, AZ US	2014-05-21	0	0	0
FLAGSTAFF AIRPORT, AZ US	2014-05-22	0	0	0
FLAGSTAFF AIRPORT, AZ US	2014-05-23	0	0	0
FLAGSTAFF AIRPORT, AZ US	2014-05-24	0	0	0
FLAGSTAFF AIRPORT, AZ US	2014-05-25	0	0	0
FLAGSTAFF AIRPORT, AZ US	2014-05-26	0	0	0
FLAGSTAFF AIRPORT, AZ US	2014-05-27	0	0	0
FLAGSTAFF AIRPORT, AZ US	2014-05-28	0	0	0
FLAGSTAFF AIRPORT, AZ US	2014-05-29	0.07	0	0
FLAGSTAFF AIRPORT, AZ US	2014-05-30	0	0	0
FLAGSTAFF AIRPORT, AZ US	2014-05-31	0	0	0
FLAGSTAFF AIRPORT, AZ US	2014-06-01	0	0	0
FLAGSTAFF AIRPORT, AZ US	2014-06-02	0	0	0
FLAGSTAFF AIRPORT, AZ US	2014-06-03	0	0	0
FLAGSTAFF AIRPORT, AZ US	2014-06-04	0	0	0
FLAGSTAFF AIRPORT, AZ US	2014-06-05	0	0	0
FLAGSTAFF AIRPORT, AZ US	2014-06-06	0	0	0
FLAGSTAFF AIRPORT, AZ US	2014-06-07	0	0	0
FLAGSTAFF AIRPORT, AZ US	2014-06-08	0	0	0
FLAGSTAFF AIRPORT, AZ US	2014-06-09	0	0	0
FLAGSTAFF AIRPORT, AZ US	2014-06-10	0	0	0
FLAGSTAFF AIRPORT, AZ US	2014-06-11	0	0	0
FLAGSTAFF AIRPORT, AZ US	2014-06-12	0	0	0
FLAGSTAFF AIRPORT, AZ US	2014-06-13	0	0	0
FLAGSTAFF AIRPORT, AZ US	2014-06-14	0	0	0
FLAGSTAFF AIRPORT, AZ US	2014-06-15	0	0	0
FLAGSTAFF AIRPORT, AZ US	2014-06-16	0	0	0
FLAGSTAFF AIRPORT, AZ US	2014-06-17	0	0	0
FLAGSTAFF AIRPORT, AZ US	2014-06-18	0	0	0
FLAGSTAFF AIRPORT, AZ US	2014-06-19	0	0	0
FLAGSTAFF AIRPORT, AZ US	2014-06-20	0	0	0
FLAGSTAFF AIRPORT, AZ US	2014-06-21	0	0	0
FLAGSTAFF AIRPORT, AZ US	2014-06-22	0	0	0
FLAGSTAFF AIRPORT, AZ US	2014-06-23	0	0	0
FLAGSTAFF AIRPORT, AZ US	2014-06-24	0	0	0
FLAGSTAFF AIRPORT, AZ US	2014-06-25	0	0	0
FLAGSTAFF AIRPORT, AZ US	2014-06-26	0	0	0
FLAGSTAFF AIRPORT, AZ US	2014-06-27	0	0	0
FLAGSTAFF AIRPORT, AZ US	2014-06-28	0	0	0
FLAGSTAFF AIRPORT, AZ US	2014-06-29	0	0	0
FLAGSTAFF AIRPORT, AZ US	2014-06-30	0	0	0
FLAGSTAFF AIRPORT, AZ US	2014-07-01	0	0	0
FLAGSTAFF AIRPORT, AZ US	2014-07-02	0	0	0
FLAGSTAFF AIRPORT, AZ US	2014-07-03	0.04	0	0
FLAGSTAFF AIRPORT, AZ US	2014-07-04	1.89	0	0
FLAGSTAFF AIRPORT, AZ US	2014-07-05	0.03	0	0
FLAGSTAFF AIRPORT, AZ US	2014-07-06	0	0	0
FLAGSTAFF AIRPORT, AZ US	2014-07-07	0.68	0	0
FLAGSTAFF AIRPORT, AZ US	2014-07-08	0	0	0
FLAGSTAFF AIRPORT, AZ US	2014-07-09	0.04	0	0
FLAGSTAFF AIRPORT, AZ US	2014-07-10	0	0	0
FLAGSTAFF AIRPORT, AZ US	2014-07-11	0	0	0
FLAGSTAFF AIRPORT, AZ US	2014-07-12	0.09	0	0
FLAGSTAFF AIRPORT, AZ US	2014-07-13	0.01	0	0
FLAGSTAFF AIRPORT, AZ US	2014-07-14	0.02	0	0
FLAGSTAFF AIRPORT, AZ US	2014-07-15	0.08	0	0
FLAGSTAFF AIRPORT, AZ US	2014-07-16	0	0	0
FLAGSTAFF AIRPORT, AZ US	2014-07-17	0	0	0
FLAGSTAFF AIRPORT, AZ US	2014-07-18	0	0	0
FLAGSTAFF AIRPORT, AZ US	2014-07-19	0	0	0
FLAGSTAFF AIRPORT, AZ US	2014-07-20	0	0	0
FLAGSTAFF AIRPORT, AZ US	2014-07-21	0	0	0
FLAGSTAFF AIRPORT, AZ US	2014-07-22	0	0	0
FLAGSTAFF AIRPORT, AZ US	2014-07-23	0	0	0
FLAGSTAFF AIRPORT, AZ US	2014-07-24	0.03	0	0
FLAGSTAFF AIRPORT, AZ US	2014-07-25	0	0	0
FLAGSTAFF AIRPORT, AZ US	2014-07-26	0.68	0	0
FLAGSTAFF AIRPORT, AZ US	2014-07-27	0.07	0	0
FLAGSTAFF AIRPORT, AZ US	2014-07-28	0.01	0	0
FLAGSTAFF AIRPORT, AZ US	2014-07-29	0	0	0
FLAGSTAFF AIRPORT, AZ US	2014-07-30	0	0	0
FLAGSTAFF AIRPORT, AZ US	2014-07-31	0.65	0	0
FLAGSTAFF AIRPORT, AZ US	2014-08-01	0.43	0	0
FLAGSTAFF AIRPORT, AZ US	2014-08-02	0.23	0	0
FLAGSTAFF AIRPORT, AZ US	2014-08-03	0.48	0	0
FLAGSTAFF AIRPORT, AZ US	2014-08-04	0	0	0
FLAGSTAFF AIRPORT, AZ US	2014-08-05	0	0	0
FLAGSTAFF AIRPORT, AZ US	2014-08-06	0	0	0
FLAGSTAFF AIRPORT, AZ US	2014-08-07	0	0	0
FLAGSTAFF AIRPORT, AZ US	2014-08-08	0	0	0
FLAGSTAFF AIRPORT, AZ US	2014-08-09	0	0	0
FLAGSTAFF AIRPORT, AZ US	2014-08-10	0	0	0
FLAGSTAFF AIRPORT, AZ US	2014-08-11	0.48	0	0
FLAGSTAFF AIRPORT, AZ US	2014-08-12	0.77	0	0
FLAGSTAFF AIRPORT, AZ US	2014-08-13	0.94	0	0
FLAGSTAFF AIRPORT, AZ US	2014-08-14	0	0	0
FLAGSTAFF AIRPORT, AZ US	2014-08-15	0.21	0	0
FLAGSTAFF AIRPORT, AZ US	2014-08-16	0	0	0
FLAGSTAFF AIRPORT, AZ US	2014-08-17	0.17	0	0
FLAGSTAFF AIRPORT, AZ US	2014-08-18	0.12	0	0
FLAGSTAFF AIRPORT, AZ US	2014-08-19	0.78	0	0
FLAGSTAFF AIRPORT, AZ US	2014-08-20	0	0	0
FLAGSTAFF AIRPORT, AZ US	2014-08-21	0.28	0	0
FLAGSTAFF AIRPORT, AZ US	2014-08-22	0.15	0	0
FLAGSTAFF AIRPORT, AZ US	2014-08-23	0	0	0
FLAGSTAFF AIRPORT, AZ US	2014-08-24	0	0	0
FLAGSTAFF AIRPORT, AZ US	2014-08-25	0	0	0
FLAGSTAFF AIRPORT, AZ US	2014-08-26	0.08	0	0
FLAGSTAFF AIRPORT, AZ US	2014-08-27	0.19	0	0
FLAGSTAFF AIRPORT, AZ US	2014-08-28	0	0	0
FLAGSTAFF AIRPORT, AZ US	2014-08-29	0	0	0
FLAGSTAFF AIRPORT, AZ US	2014-08-30	0	0	0
FLAGSTAFF AIRPORT, AZ US	2014-08-31	0	0	0
FLAGSTAFF AIRPORT, AZ US	2014-09-01	0	0	0
FLAGSTAFF AIRPORT, AZ US	2014-09-02	0	0	0
FLAGSTAFF AIRPORT, AZ US	2014-09-03	0	0	0
FLAGSTAFF AIRPORT, AZ US	2014-09-04	0.2	0	0
FLAGSTAFF AIRPORT, AZ US	2014-09-05	0.48	0	0
FLAGSTAFF AIRPORT, AZ US	2014-09-06	0	0	0
FLAGSTAFF AIRPORT, AZ US	2014-09-07	0.02	0	0
FLAGSTAFF AIRPORT, AZ US	2014-09-08	0.26	0	0
FLAGSTAFF AIRPORT, AZ US	2014-09-09	0.36	0	0
FLAGSTAFF AIRPORT, AZ US	2014-09-10	0	0	0
FLAGSTAFF AIRPORT, AZ US	2014-09-11	0	0	0
FLAGSTAFF AIRPORT, AZ US	2014-09-12	0	0	0
FLAGSTAFF AIRPORT, AZ US	2014-09-13	0	0	0
FLAGSTAFF AIRPORT, AZ US	2014-09-14	0	0	0
FLAGSTAFF AIRPORT, AZ US	2014-09-15	0	0	0
FLAGSTAFF AIRPORT, AZ US	2014-09-16	0.03	0	0
FLAGSTAFF AIRPORT, AZ US	2014-09-17	0.16	0	0
FLAGSTAFF AIRPORT, AZ US	2014-09-18	0.01	0	0
FLAGSTAFF AIRPORT, AZ US	2014-09-19	0.28	0	0
FLAGSTAFF AIRPORT, AZ US	2014-09-20	0	0	0
FLAGSTAFF AIRPORT, AZ US	2014-09-21	0	0	0
FLAGSTAFF AIRPORT, AZ US	2014-09-22	0	0	0
FLAGSTAFF AIRPORT, AZ US	2014-09-23	0	0	0
FLAGSTAFF AIRPORT, AZ US	2014-09-24	0	0	0
FLAGSTAFF AIRPORT, AZ US	2014-09-25	0	0	0
FLAGSTAFF AIRPORT, AZ US	2014-09-26	0.54	0	0
FLAGSTAFF AIRPORT, AZ US	2014-09-27	0.72	0	0
FLAGSTAFF AIRPORT, AZ US	2014-09-28	0.04	0	0
FLAGSTAFF AIRPORT, AZ US	2014-09-29	0	0	0
FLAGSTAFF AIRPORT, AZ US	2014-09-30	0	0	0
FLAGSTAFF AIRPORT, AZ US	2014-10-01	0	0	0
FLAGSTAFF AIRPORT, AZ US	2014-10-02	0	0	0
FLAGSTAFF AIRPORT, AZ US	2014-10-03	0	0	0
FLAGSTAFF AIRPORT, AZ US	2014-10-04	0	0	0
FLAGSTAFF AIRPORT, AZ US	2014-10-05	0	0	0
FLAGSTAFF AIRPORT, AZ US	2014-10-06	0	0	0
FLAGSTAFF AIRPORT, AZ US	2014-10-07	0	0	0
FLAGSTAFF AIRPORT, AZ US	2014-10-08	0.03	0	0
FLAGSTAFF AIRPORT, AZ US	2014-10-09	0.65	0	0
FLAGSTAFF AIRPORT, AZ US	2014-10-10	0	0	0
FLAGSTAFF AIRPORT, AZ US	2014-10-11	0	0	0
FLAGSTAFF AIRPORT, AZ US	2014-10-12	0	0	0
FLAGSTAFF AIRPORT, AZ US	2014-10-13	0	0	0
FLAGSTAFF AIRPORT, AZ US	2014-10-14	0	0	0
FLAGSTAFF AIRPORT, AZ US	2014-10-15	0	0	0
FLAGSTAFF AIRPORT, AZ US	2014-10-16	0	0	0
FLAGSTAFF AIRPORT, AZ US	2014-10-17	0	0	0
FLAGSTAFF AIRPORT, AZ US	2014-10-18	0	0	0
FLAGSTAFF AIRPORT, AZ US	2014-10-19	0.01	0	0
FLAGSTAFF AIRPORT, AZ US	2014-10-20	0	0	0
FLAGSTAFF AIRPORT, AZ US	2014-10-21	0	0	0
FLAGSTAFF AIRPORT, AZ US	2014-10-22	0	0	0
FLAGSTAFF AIRPORT, AZ US	2014-10-23	0	0	0
FLAGSTAFF AIRPORT, AZ US	2014-10-24	0	0	0
FLAGSTAFF AIRPORT, AZ US	2014-10-25	0	0	0
FLAGSTAFF AIRPORT, AZ US	2014-10-26	0	0	0
FLAGSTAFF AIRPORT, AZ US	2014-10-27	0	0	0
FLAGSTAFF AIRPORT, AZ US	2014-10-28	0	0	0
FLAGSTAFF AIRPORT, AZ US	2014-10-29	0	0	0
FLAGSTAFF AIRPORT, AZ US	2014-10-30	0	0	0
FLAGSTAFF AIRPORT, AZ US	2014-10-31	0	0	0
FLAGSTAFF AIRPORT, AZ US	2014-11-01	0.16	0	0
FLAGSTAFF AIRPORT, AZ US	2014-11-02	0.44	0	0
FLAGSTAFF AIRPORT, AZ US	2014-11-03	0	0	0
FLAGSTAFF AIRPORT, AZ US	2014-11-04	0	0	0
FLAGSTAFF AIRPORT, AZ US	2014-11-05	0	0	0
FLAGSTAFF AIRPORT, AZ US	2014-11-06	0	0	0
FLAGSTAFF AIRPORT, AZ US	2014-11-07	0	0	0
FLAGSTAFF AIRPORT, AZ US	2014-11-08	0	0	0
FLAGSTAFF AIRPORT, AZ US	2014-11-09	0	0	0
FLAGSTAFF AIRPORT, AZ US	2014-11-10	0	0	0
FLAGSTAFF AIRPORT, AZ US	2014-11-11	0	0	0
FLAGSTAFF AIRPORT, AZ US	2014-11-12	0	0	0
FLAGSTAFF AIRPORT, AZ US	2014-11-13	0	0	0
FLAGSTAFF AIRPORT, AZ US	2014-11-14	0	0	0
FLAGSTAFF AIRPORT, AZ US	2014-11-15	0	0	0
FLAGSTAFF AIRPORT, AZ US	2014-11-16	0	0	0
FLAGSTAFF AIRPORT, AZ US	2014-11-17	0	0	0
FLAGSTAFF AIRPORT, AZ US	2014-11-18	0	0	0
FLAGSTAFF AIRPORT, AZ US	2014-11-19	0	0	0
FLAGSTAFF AIRPORT, AZ US	2014-11-20	0	0	0
FLAGSTAFF AIRPORT, AZ US	2014-11-21	0	0	0
FLAGSTAFF AIRPORT, AZ US	2014-11-22	0	0	0
FLAGSTAFF AIRPORT, AZ US	2014-11-23	0	0	0
FLAGSTAFF AIRPORT, AZ US	2014-11-24	0	0	0
FLAGSTAFF AIRPORT, AZ US	2014-11-25	0	0	0
FLAGSTAFF AIRPORT, AZ US	2014-11-26	0	0	0
FLAGSTAFF AIRPORT, AZ US	2014-11-27	0	0	0
FLAGSTAFF AIRPORT, AZ US	2014-11-28	0	0	0
FLAGSTAFF AIRPORT, AZ US	2014-11-29	0	0	0
FLAGSTAFF AIRPORT, AZ US	2014-11-30	0	0	0
FLAGSTAFF AIRPORT, AZ US	2014-12-01	0	0	0
FLAGSTAFF AIRPORT, AZ US	2014-12-02	0.06	0	0
FLAGSTAFF AIRPORT, AZ US	2014-12-03	1.07	0	0
FLAGSTAFF AIRPORT, AZ US	2014-12-04	0.66	0	0
FLAGSTAFF AIRPORT, AZ US	2014-12-05	0	0	0
FLAGSTAFF AIRPORT, AZ US	2014-12-06	0	0	0
FLAGSTAFF AIRPORT, AZ US	2014-12-07	0	0	0
FLAGSTAFF AIRPORT, AZ US	2014-12-08	0	0	0
FLAGSTAFF AIRPORT, AZ US	2014-12-09	0	0	0
FLAGSTAFF AIRPORT, AZ US	2014-12-10	0	0	0
FLAGSTAFF AIRPORT, AZ US	2014-12-11	0	0	0
FLAGSTAFF AIRPORT, AZ US	2014-12-12	0.05	0	0
FLAGSTAFF AIRPORT, AZ US	2014-12-13	0.58	1.1	0
FLAGSTAFF AIRPORT, AZ US	2014-12-14	0	0	0
FLAGSTAFF AIRPORT, AZ US	2014-12-15	0	0	0
FLAGSTAFF AIRPORT, AZ US	2014-12-16	0	0	0
FLAGSTAFF AIRPORT, AZ US	2014-12-17	0.09	1.3	1.2
FLAGSTAFF AIRPORT, AZ US	2014-12-18	0.2	2	0
FLAGSTAFF AIRPORT, AZ US	2014-12-19	0	0	2
FLAGSTAFF AIRPORT, AZ US	2014-12-20	0	0	1.2
FLAGSTAFF AIRPORT, AZ US	2014-12-21	0	0	0
FLAGSTAFF AIRPORT, AZ US	2014-12-22	0	0	0
FLAGSTAFF AIRPORT, AZ US	2014-12-23	0	0	0
FLAGSTAFF AIRPORT, AZ US	2014-12-24	0	0	0
FLAGSTAFF AIRPORT, AZ US	2014-12-25	0.04	0.5	0
FLAGSTAFF AIRPORT, AZ US	2014-12-26	0	0	0
FLAGSTAFF AIRPORT, AZ US	2014-12-27	0	0	0
FLAGSTAFF AIRPORT, AZ US	2014-12-28	0	0	0
FLAGSTAFF AIRPORT, AZ US	2014-12-29	0	0	0
FLAGSTAFF AIRPORT, AZ US	2014-12-30	0	0	0
FLAGSTAFF AIRPORT, AZ US	2014-12-31	0.69	14.1	1.2
FLAGSTAFF AIRPORT, AZ US	2015-01-01	0.17	3.2	15
FLAGSTAFF AIRPORT, AZ US	2015-01-02	0	0	11
FLAGSTAFF AIRPORT, AZ US	2015-01-03	0	0	9.1
FLAGSTAFF AIRPORT, AZ US	2015-01-04	0	0	7.1
FLAGSTAFF AIRPORT, AZ US	2015-01-05	0	0	5.9
FLAGSTAFF AIRPORT, AZ US	2015-01-06	0	0	5.1
FLAGSTAFF AIRPORT, AZ US	2015-01-07	0	0	3.9
FLAGSTAFF AIRPORT, AZ US	2015-01-08	0	0	2
FLAGSTAFF AIRPORT, AZ US	2015-01-09	0	0	0
FLAGSTAFF AIRPORT, AZ US	2015-01-10	0.13	0	0
FLAGSTAFF AIRPORT, AZ US	2015-01-11	0.02	0	0
FLAGSTAFF AIRPORT, AZ US	2015-01-12	0.16	0.4	0
FLAGSTAFF AIRPORT, AZ US	2015-01-13	0.53	6	0
FLAGSTAFF AIRPORT, AZ US	2015-01-14	0	0	3.1
FLAGSTAFF AIRPORT, AZ US	2015-01-15	0	0	0
FLAGSTAFF AIRPORT, AZ US	2015-01-16	0	0	0
FLAGSTAFF AIRPORT, AZ US	2015-01-17	0	0	0
FLAGSTAFF AIRPORT, AZ US	2015-01-18	0	0	0
FLAGSTAFF AIRPORT, AZ US	2015-01-19	0	0	0
FLAGSTAFF AIRPORT, AZ US	2015-01-20	0	0	0
FLAGSTAFF AIRPORT, AZ US	2015-01-21	0.04	1.1	0
FLAGSTAFF AIRPORT, AZ US	2015-01-22	0	0	0
FLAGSTAFF AIRPORT, AZ US	2015-01-23	0	0	0
FLAGSTAFF AIRPORT, AZ US	2015-01-24	0	0	0
FLAGSTAFF AIRPORT, AZ US	2015-01-25	0	0	0
FLAGSTAFF AIRPORT, AZ US	2015-01-26	0	0	0
FLAGSTAFF AIRPORT, AZ US	2015-01-27	0.04	0	0
FLAGSTAFF AIRPORT, AZ US	2015-01-28	0	0	0
FLAGSTAFF AIRPORT, AZ US	2015-01-29	0.29	0	0
FLAGSTAFF AIRPORT, AZ US	2015-01-30	0.78	0	0
FLAGSTAFF AIRPORT, AZ US	2015-01-31	0.03	0	0
FLAGSTAFF AIRPORT, AZ US	2015-02-01	0	0	0
FLAGSTAFF AIRPORT, AZ US	2015-02-02	0	0	0
FLAGSTAFF AIRPORT, AZ US	2015-02-03	0	0	0
FLAGSTAFF AIRPORT, AZ US	2015-02-04	0	0	0
FLAGSTAFF AIRPORT, AZ US	2015-02-05	0	0	0
FLAGSTAFF AIRPORT, AZ US	2015-02-06	0	0	0
FLAGSTAFF AIRPORT, AZ US	2015-02-07	0	0	0
FLAGSTAFF AIRPORT, AZ US	2015-02-08	0	0	0
FLAGSTAFF AIRPORT, AZ US	2015-02-09	0	0	0
FLAGSTAFF AIRPORT, AZ US	2015-02-10	0	0	0
FLAGSTAFF AIRPORT, AZ US	2015-02-11	0	0	0
FLAGSTAFF AIRPORT, AZ US	2015-02-12	0	0	0
FLAGSTAFF AIRPORT, AZ US	2015-02-13	0	0	0
FLAGSTAFF AIRPORT, AZ US	2015-02-14	0	0	0
FLAGSTAFF AIRPORT, AZ US	2015-02-15	0	0	0
FLAGSTAFF AIRPORT, AZ US	2015-02-16	0	0	0
FLAGSTAFF AIRPORT, AZ US	2015-02-17	0	0	0
FLAGSTAFF AIRPORT, AZ US	2015-02-18	0	0	0
FLAGSTAFF AIRPORT, AZ US	2015-02-19	0	0	0
FLAGSTAFF AIRPORT, AZ US	2015-02-20	0	0	0
FLAGSTAFF AIRPORT, AZ US	2015-02-21	0	0	0
FLAGSTAFF AIRPORT, AZ US	2015-02-22	0.27	1.1	0
FLAGSTAFF AIRPORT, AZ US	2015-02-23	1.3	6.5	3.9
FLAGSTAFF AIRPORT, AZ US	2015-02-24	0.07	1	5.1
FLAGSTAFF AIRPORT, AZ US	2015-02-25	0	0	5.1
FLAGSTAFF AIRPORT, AZ US	2015-02-26	0	0	3.9
FLAGSTAFF AIRPORT, AZ US	2015-02-27	0	0	3.1
FLAGSTAFF AIRPORT, AZ US	2015-02-28	0.48	0.6	2
FLAGSTAFF AIRPORT, AZ US	2015-03-01	1.98	8	3.9
FLAGSTAFF AIRPORT, AZ US	2015-03-02	1.71	8.4	7.1
FLAGSTAFF AIRPORT, AZ US	2015-03-03	0	0.9	11.8
FLAGSTAFF AIRPORT, AZ US	2015-03-04	0	0	9.8
FLAGSTAFF AIRPORT, AZ US	2015-03-05	0	0	9.1
FLAGSTAFF AIRPORT, AZ US	2015-03-06	0	0	7.1
FLAGSTAFF AIRPORT, AZ US	2015-03-07	0	0	5.1
FLAGSTAFF AIRPORT, AZ US	2015-03-08	0	0	3.1
FLAGSTAFF AIRPORT, AZ US	2015-03-09	0	0	3.1
FLAGSTAFF AIRPORT, AZ US	2015-03-10	0	0	2
FLAGSTAFF AIRPORT, AZ US	2015-03-11	0	0	0
FLAGSTAFF AIRPORT, AZ US	2015-03-12	0.04	0	0
FLAGSTAFF AIRPORT, AZ US	2015-03-13	0	0	0
FLAGSTAFF AIRPORT, AZ US	2015-03-14	0	0	0
FLAGSTAFF AIRPORT, AZ US	2015-03-15	0	0	0
FLAGSTAFF AIRPORT, AZ US	2015-03-16	0	0	0
FLAGSTAFF AIRPORT, AZ US	2015-03-17	0	0	0
FLAGSTAFF AIRPORT, AZ US	2015-03-18	0	0	0
FLAGSTAFF AIRPORT, AZ US	2015-03-19	0	0	0
FLAGSTAFF AIRPORT, AZ US	2015-03-20	0	0	0
FLAGSTAFF AIRPORT, AZ US	2015-03-21	0	0	0
FLAGSTAFF AIRPORT, AZ US	2015-03-22	0	0	0
FLAGSTAFF AIRPORT, AZ US	2015-03-23	0	0	0
FLAGSTAFF AIRPORT, AZ US	2015-03-24	0	0	0
FLAGSTAFF AIRPORT, AZ US	2015-03-25	0	0	0
FLAGSTAFF AIRPORT, AZ US	2015-03-26	0	0	0
FLAGSTAFF AIRPORT, AZ US	2015-03-27	0	0	0
FLAGSTAFF AIRPORT, AZ US	2015-03-28	0	0	0
FLAGSTAFF AIRPORT, AZ US	2015-03-29	0	0	0
FLAGSTAFF AIRPORT, AZ US	2015-03-30	0	0	0
FLAGSTAFF AIRPORT, AZ US	2015-03-31	0	0	0
FLAGSTAFF AIRPORT, AZ US	2015-04-01	0	0	0
FLAGSTAFF AIRPORT, AZ US	2015-04-02	0	0	0
FLAGSTAFF AIRPORT, AZ US	2015-04-03	0	0	0
FLAGSTAFF AIRPORT, AZ US	2015-04-04	0	0	0
FLAGSTAFF AIRPORT, AZ US	2015-04-05	0	0	0
FLAGSTAFF AIRPORT, AZ US	2015-04-06	0	0	0
FLAGSTAFF AIRPORT, AZ US	2015-04-07	0	0	0
FLAGSTAFF AIRPORT, AZ US	2015-04-08	0	0	0
FLAGSTAFF AIRPORT, AZ US	2015-04-09	0	0	0
FLAGSTAFF AIRPORT, AZ US	2015-04-10	0	0	0
FLAGSTAFF AIRPORT, AZ US	2015-04-11	0	0	0
FLAGSTAFF AIRPORT, AZ US	2015-04-12	0	0	0
FLAGSTAFF AIRPORT, AZ US	2015-04-13	0	0	0
FLAGSTAFF AIRPORT, AZ US	2015-04-14	0	0	0
FLAGSTAFF AIRPORT, AZ US	2015-04-15	0	0	0
FLAGSTAFF AIRPORT, AZ US	2015-04-16	0	0	0
FLAGSTAFF AIRPORT, AZ US	2015-04-17	0.03	0.3	0
FLAGSTAFF AIRPORT, AZ US	2015-04-18	0	0	0
FLAGSTAFF AIRPORT, AZ US	2015-04-19	0	0	0
FLAGSTAFF AIRPORT, AZ US	2015-04-20	0	0	0
FLAGSTAFF AIRPORT, AZ US	2015-04-21	0	0	0
FLAGSTAFF AIRPORT, AZ US	2015-04-22	0	0	0
FLAGSTAFF AIRPORT, AZ US	2015-04-23	0	0	0
FLAGSTAFF AIRPORT, AZ US	2015-04-24	0.46	0	0
FLAGSTAFF AIRPORT, AZ US	2015-04-25	0.57	0	0
FLAGSTAFF AIRPORT, AZ US	2015-04-26	0.03	0.5	0
FLAGSTAFF AIRPORT, AZ US	2015-04-27	0	0	0
FLAGSTAFF AIRPORT, AZ US	2015-04-28	0	0	0
FLAGSTAFF AIRPORT, AZ US	2015-04-29	0	0	0
FLAGSTAFF AIRPORT, AZ US	2015-04-30	0	0	0
FLAGSTAFF AIRPORT, AZ US	2015-05-01	0	0	0
FLAGSTAFF AIRPORT, AZ US	2015-05-02	0	0	0
FLAGSTAFF AIRPORT, AZ US	2015-05-03	0	0	0
FLAGSTAFF AIRPORT, AZ US	2015-05-04	0.07	0	0
FLAGSTAFF AIRPORT, AZ US	2015-05-05	0.2	0	0
FLAGSTAFF AIRPORT, AZ US	2015-05-06	0	0	0
FLAGSTAFF AIRPORT, AZ US	2015-05-07	0	0	0
FLAGSTAFF AIRPORT, AZ US	2015-05-08	0.26	1.3	0
FLAGSTAFF AIRPORT, AZ US	2015-05-09	0.18	4.3	3.9
FLAGSTAFF AIRPORT, AZ US	2015-05-10	0	0	0
FLAGSTAFF AIRPORT, AZ US	2015-05-11	0	0	0
FLAGSTAFF AIRPORT, AZ US	2015-05-12	0	0	0
FLAGSTAFF AIRPORT, AZ US	2015-05-13	0	0	0
FLAGSTAFF AIRPORT, AZ US	2015-05-14	0.2	0	0
FLAGSTAFF AIRPORT, AZ US	2015-05-15	0.65	0.3	0
FLAGSTAFF AIRPORT, AZ US	2015-05-16	0.1	0	0
FLAGSTAFF AIRPORT, AZ US	2015-05-17	0	0	0
FLAGSTAFF AIRPORT, AZ US	2015-05-18	0.01	0	0
FLAGSTAFF AIRPORT, AZ US	2015-05-19	0	0	0
FLAGSTAFF AIRPORT, AZ US	2015-05-20	0	0	0
FLAGSTAFF AIRPORT, AZ US	2015-05-21	0	0	0
FLAGSTAFF AIRPORT, AZ US	2015-05-22	0	0	0
FLAGSTAFF AIRPORT, AZ US	2015-05-23	0	0	0
FLAGSTAFF AIRPORT, AZ US	2015-05-24	0.03	0	0
FLAGSTAFF AIRPORT, AZ US	2015-05-25	0.1	0	0
FLAGSTAFF AIRPORT, AZ US	2015-05-26	0	0	0
FLAGSTAFF AIRPORT, AZ US	2015-05-27	0	0	0
FLAGSTAFF AIRPORT, AZ US	2015-05-28	0	0	0
FLAGSTAFF AIRPORT, AZ US	2015-05-29	0	0	0
FLAGSTAFF AIRPORT, AZ US	2015-05-30	0	0	0
FLAGSTAFF AIRPORT, AZ US	2015-05-31	0	0	0
FLAGSTAFF AIRPORT, AZ US	2015-06-01	0	0	0
FLAGSTAFF AIRPORT, AZ US	2015-06-02	0	0	0
FLAGSTAFF AIRPORT, AZ US	2015-06-03	0	0	0
FLAGSTAFF AIRPORT, AZ US	2015-06-04	0	0	0
FLAGSTAFF AIRPORT, AZ US	2015-06-05	1	0	0
FLAGSTAFF AIRPORT, AZ US	2015-06-06	0.07	0	0
FLAGSTAFF AIRPORT, AZ US	2015-06-07	0	0	0
FLAGSTAFF AIRPORT, AZ US	2015-06-08	0	0	0
FLAGSTAFF AIRPORT, AZ US	2015-06-09	0.01	0	0
FLAGSTAFF AIRPORT, AZ US	2015-06-10	0.04	0	0
FLAGSTAFF AIRPORT, AZ US	2015-06-11	0	0	0
FLAGSTAFF AIRPORT, AZ US	2015-06-12	0	0	0
FLAGSTAFF AIRPORT, AZ US	2015-06-13	0.02	0	0
FLAGSTAFF AIRPORT, AZ US	2015-06-14	0	0	0
FLAGSTAFF AIRPORT, AZ US	2015-06-15	0	0	0
FLAGSTAFF AIRPORT, AZ US	2015-06-16	0	0	0
FLAGSTAFF AIRPORT, AZ US	2015-06-17	0	0	0
FLAGSTAFF AIRPORT, AZ US	2015-06-18	0	0	0
FLAGSTAFF AIRPORT, AZ US	2015-06-19	0	0	0
FLAGSTAFF AIRPORT, AZ US	2015-06-20	0	0	0
FLAGSTAFF AIRPORT, AZ US	2015-06-21	0	0	0
FLAGSTAFF AIRPORT, AZ US	2015-06-22	0	0	0
FLAGSTAFF AIRPORT, AZ US	2015-06-23	0	0	0
FLAGSTAFF AIRPORT, AZ US	2015-06-24	0	0	0
FLAGSTAFF AIRPORT, AZ US	2015-06-25	0	0	0
FLAGSTAFF AIRPORT, AZ US	2015-06-26	0	0	0
FLAGSTAFF AIRPORT, AZ US	2015-06-27	0.09	0	0
FLAGSTAFF AIRPORT, AZ US	2015-06-28	0.06	0	0
FLAGSTAFF AIRPORT, AZ US	2015-06-29	0.41	0	0
FLAGSTAFF AIRPORT, AZ US	2015-06-30	0	0	0
FLAGSTAFF AIRPORT, AZ US	2015-07-01	0.06	0	0
FLAGSTAFF AIRPORT, AZ US	2015-07-02	0.06	0	0
FLAGSTAFF AIRPORT, AZ US	2015-07-03	0.53	0	0
FLAGSTAFF AIRPORT, AZ US	2015-07-04	0.19	0	0
FLAGSTAFF AIRPORT, AZ US	2015-07-05	0.53	0	0
FLAGSTAFF AIRPORT, AZ US	2015-07-06	0.07	0	0
FLAGSTAFF AIRPORT, AZ US	2015-07-07	0.25	0	0
FLAGSTAFF AIRPORT, AZ US	2015-07-08	0	0	0
FLAGSTAFF AIRPORT, AZ US	2015-07-09	0	0	0
FLAGSTAFF AIRPORT, AZ US	2015-07-10	0	0	0
FLAGSTAFF AIRPORT, AZ US	2015-07-11	0.01	0	0
FLAGSTAFF AIRPORT, AZ US	2015-07-12	0	0	0
FLAGSTAFF AIRPORT, AZ US	2015-07-13	0	0	0
FLAGSTAFF AIRPORT, AZ US	2015-07-14	0.01	0	0
FLAGSTAFF AIRPORT, AZ US	2015-07-15	0	0	0
FLAGSTAFF AIRPORT, AZ US	2015-07-16	0	0	0
FLAGSTAFF AIRPORT, AZ US	2015-07-17	0	0	0
FLAGSTAFF AIRPORT, AZ US	2015-07-18	0.79	0	0
FLAGSTAFF AIRPORT, AZ US	2015-07-19	0.09	0	0
FLAGSTAFF AIRPORT, AZ US	2015-07-20	0	0	0
FLAGSTAFF AIRPORT, AZ US	2015-07-21	0	0	0
FLAGSTAFF AIRPORT, AZ US	2015-07-22	0	0	0
FLAGSTAFF AIRPORT, AZ US	2015-07-23	0	0	0
FLAGSTAFF AIRPORT, AZ US	2015-07-24	0	0	0
FLAGSTAFF AIRPORT, AZ US	2015-07-25	0	0	0
FLAGSTAFF AIRPORT, AZ US	2015-07-26	0	0	0
FLAGSTAFF AIRPORT, AZ US	2015-07-27	0	0	0
FLAGSTAFF AIRPORT, AZ US	2015-07-28	0	0	0
FLAGSTAFF AIRPORT, AZ US	2015-07-29	0	0	0
FLAGSTAFF AIRPORT, AZ US	2015-07-30	0.02	0	0
FLAGSTAFF AIRPORT, AZ US	2015-07-31	0.16	0	0
FLAGSTAFF AIRPORT, AZ US	2015-08-01	0	0	0
FLAGSTAFF AIRPORT, AZ US	2015-08-02	0.02	0	0
FLAGSTAFF AIRPORT, AZ US	2015-08-03	0	0	0
FLAGSTAFF AIRPORT, AZ US	2015-08-04	0	0	0
FLAGSTAFF AIRPORT, AZ US	2015-08-05	0	0	0
FLAGSTAFF AIRPORT, AZ US	2015-08-06	0	0	0
FLAGSTAFF AIRPORT, AZ US	2015-08-07	1.57	0	0
FLAGSTAFF AIRPORT, AZ US	2015-08-08	0.04	0	0
FLAGSTAFF AIRPORT, AZ US	2015-08-09	0	0	0
FLAGSTAFF AIRPORT, AZ US	2015-08-10	0	0	0
FLAGSTAFF AIRPORT, AZ US	2015-08-11	0.14	0	0
FLAGSTAFF AIRPORT, AZ US	2015-08-12	0.25	0	0
FLAGSTAFF AIRPORT, AZ US	2015-08-13	0	0	0
FLAGSTAFF AIRPORT, AZ US	2015-08-14	0	0	0
FLAGSTAFF AIRPORT, AZ US	2015-08-15	0	0	0
FLAGSTAFF AIRPORT, AZ US	2015-08-16	0	0	0
FLAGSTAFF AIRPORT, AZ US	2015-08-17	0	0	0
FLAGSTAFF AIRPORT, AZ US	2015-08-18	0	0	0
FLAGSTAFF AIRPORT, AZ US	2015-08-19	0	0	0
FLAGSTAFF AIRPORT, AZ US	2015-08-20	0	0	0
FLAGSTAFF AIRPORT, AZ US	2015-08-21	0	0	0
FLAGSTAFF AIRPORT, AZ US	2015-08-22	0	0	0
FLAGSTAFF AIRPORT, AZ US	2015-08-23	0.01	0	0
FLAGSTAFF AIRPORT, AZ US	2015-08-24	0	0	0
FLAGSTAFF AIRPORT, AZ US	2015-08-25	0.68	0	0
FLAGSTAFF AIRPORT, AZ US	2015-08-26	0	0	0
FLAGSTAFF AIRPORT, AZ US	2015-08-27	0.14	0	0
FLAGSTAFF AIRPORT, AZ US	2015-08-28	0	0	0
FLAGSTAFF AIRPORT, AZ US	2015-08-29	0	0	0
FLAGSTAFF AIRPORT, AZ US	2015-08-30	0.17	0	0
FLAGSTAFF AIRPORT, AZ US	2015-08-31	0	0	0
FLAGSTAFF AIRPORT, AZ US	2015-09-01	0	0	0
FLAGSTAFF AIRPORT, AZ US	2015-09-02	0	0	0
FLAGSTAFF AIRPORT, AZ US	2015-09-03	0	0	0
FLAGSTAFF AIRPORT, AZ US	2015-09-04	0.33	0	0
FLAGSTAFF AIRPORT, AZ US	2015-09-05	0.2	0	0
FLAGSTAFF AIRPORT, AZ US	2015-09-06	0.02	0	0
FLAGSTAFF AIRPORT, AZ US	2015-09-07	0	0	0
FLAGSTAFF AIRPORT, AZ US	2015-09-08	0	0	0
FLAGSTAFF AIRPORT, AZ US	2015-09-09	0	0	0
FLAGSTAFF AIRPORT, AZ US	2015-09-10	0	0	0
FLAGSTAFF AIRPORT, AZ US	2015-09-11	0	0	0
FLAGSTAFF AIRPORT, AZ US	2015-09-12	0	0	0
FLAGSTAFF AIRPORT, AZ US	2015-09-13	0.02	0	0
FLAGSTAFF AIRPORT, AZ US	2015-09-14	0.19	0	0
FLAGSTAFF AIRPORT, AZ US	2015-09-15	0.02	0	0
FLAGSTAFF AIRPORT, AZ US	2015-09-16	0	0	0
FLAGSTAFF AIRPORT, AZ US	2015-09-17	0	0	0
FLAGSTAFF AIRPORT, AZ US	2015-09-18	0	0	0
FLAGSTAFF AIRPORT, AZ US	2015-09-19	0	0	0
FLAGSTAFF AIRPORT, AZ US	2015-09-20	0	0	0
FLAGSTAFF AIRPORT, AZ US	2015-09-21	0	0	0
FLAGSTAFF AIRPORT, AZ US	2015-09-22	0.47	0	0
FLAGSTAFF AIRPORT, AZ US	2015-09-23	0	0	0
FLAGSTAFF AIRPORT, AZ US	2015-09-24	0	0	0
FLAGSTAFF AIRPORT, AZ US	2015-09-25	0	0	0
FLAGSTAFF AIRPORT, AZ US	2015-09-26	0	0	0
FLAGSTAFF AIRPORT, AZ US	2015-09-27	0	0	0
FLAGSTAFF AIRPORT, AZ US	2015-09-28	0	0	0
FLAGSTAFF AIRPORT, AZ US	2015-09-29	0	0	0
FLAGSTAFF AIRPORT, AZ US	2015-09-30	0	0	0
FLAGSTAFF AIRPORT, AZ US	2015-10-01	0	0	0
FLAGSTAFF AIRPORT, AZ US	2015-10-02	0	0	0
FLAGSTAFF AIRPORT, AZ US	2015-10-03	0	0	0
FLAGSTAFF AIRPORT, AZ US	2015-10-04	0.22	0	0
FLAGSTAFF AIRPORT, AZ US	2015-10-05	0.66	0	0
FLAGSTAFF AIRPORT, AZ US	2015-10-06	0.39	0	0
FLAGSTAFF AIRPORT, AZ US	2015-10-07	0	0	0
FLAGSTAFF AIRPORT, AZ US	2015-10-08	0	0	0
FLAGSTAFF AIRPORT, AZ US	2015-10-09	0	0	0
FLAGSTAFF AIRPORT, AZ US	2015-10-10	0	0	0
FLAGSTAFF AIRPORT, AZ US	2015-10-11	0	0	0
FLAGSTAFF AIRPORT, AZ US	2015-10-12	0	0	0
FLAGSTAFF AIRPORT, AZ US	2015-10-13	0	0	0
FLAGSTAFF AIRPORT, AZ US	2015-10-14	0	0	0
FLAGSTAFF AIRPORT, AZ US	2015-10-15	0	0	0
FLAGSTAFF AIRPORT, AZ US	2015-10-16	1.07	0	0
FLAGSTAFF AIRPORT, AZ US	2015-10-17	0.04	0	0
FLAGSTAFF AIRPORT, AZ US	2015-10-18	0.07	0	0
FLAGSTAFF AIRPORT, AZ US	2015-10-19	0.01	0	0
FLAGSTAFF AIRPORT, AZ US	2015-10-20	0.75	0	0
FLAGSTAFF AIRPORT, AZ US	2015-10-21	0.3	0	0
FLAGSTAFF AIRPORT, AZ US	2015-10-22	0.02	0	0
FLAGSTAFF AIRPORT, AZ US	2015-10-23	0	0	0
FLAGSTAFF AIRPORT, AZ US	2015-10-24	0	0	0
FLAGSTAFF AIRPORT, AZ US	2015-10-25	0	0	0
FLAGSTAFF AIRPORT, AZ US	2015-10-26	0	0	0
FLAGSTAFF AIRPORT, AZ US	2015-10-27	0	0	0
FLAGSTAFF AIRPORT, AZ US	2015-10-28	0	0	0
FLAGSTAFF AIRPORT, AZ US	2015-10-29	0.15	0	0
FLAGSTAFF AIRPORT, AZ US	2015-10-30	0.04	0	0
FLAGSTAFF AIRPORT, AZ US	2015-10-31	0	0	0
FLAGSTAFF AIRPORT, AZ US	2015-11-01	0	0	0
FLAGSTAFF AIRPORT, AZ US	2015-11-02	0	0	0
FLAGSTAFF AIRPORT, AZ US	2015-11-03	1.11	0	0
FLAGSTAFF AIRPORT, AZ US	2015-11-04	0.71	9.9	5.1
FLAGSTAFF AIRPORT, AZ US	2015-11-05	0	0	5.9
FLAGSTAFF AIRPORT, AZ US	2015-11-06	0	0	2
FLAGSTAFF AIRPORT, AZ US	2015-11-07	0	0	0
FLAGSTAFF AIRPORT, AZ US	2015-11-08	0	0	0
FLAGSTAFF AIRPORT, AZ US	2015-11-09	0	0	0
FLAGSTAFF AIRPORT, AZ US	2015-11-10	0.4	1.3	0
FLAGSTAFF AIRPORT, AZ US	2015-11-11	0	0	1.2
FLAGSTAFF AIRPORT, AZ US	2015-11-12	0	0	0
FLAGSTAFF AIRPORT, AZ US	2015-11-13	0	0	0
FLAGSTAFF AIRPORT, AZ US	2015-11-14	0	0	0
FLAGSTAFF AIRPORT, AZ US	2015-11-15	0.35	0	0
FLAGSTAFF AIRPORT, AZ US	2015-11-16	0.26	3.4	1.2
FLAGSTAFF AIRPORT, AZ US	2015-11-17	0	0	2
FLAGSTAFF AIRPORT, AZ US	2015-11-18	0	0	0
FLAGSTAFF AIRPORT, AZ US	2015-11-19	0	0	0
FLAGSTAFF AIRPORT, AZ US	2015-11-20	0	0	0
FLAGSTAFF AIRPORT, AZ US	2015-11-21	0	0	0
FLAGSTAFF AIRPORT, AZ US	2015-11-22	0	0	0
FLAGSTAFF AIRPORT, AZ US	2015-11-23	0	0	0
FLAGSTAFF AIRPORT, AZ US	2015-11-24	0	0	0
FLAGSTAFF AIRPORT, AZ US	2015-11-25	0	0	0
FLAGSTAFF AIRPORT, AZ US	2015-11-26	0	0	0
FLAGSTAFF AIRPORT, AZ US	2015-11-27	0	0	0
FLAGSTAFF AIRPORT, AZ US	2015-11-28	0	0	0
FLAGSTAFF AIRPORT, AZ US	2015-11-29	0	0	0
FLAGSTAFF AIRPORT, AZ US	2015-11-30	0	0	0
FLAGSTAFF AIRPORT, AZ US	2015-12-01	0	0	0
FLAGSTAFF AIRPORT, AZ US	2015-12-02	0	0	0
FLAGSTAFF AIRPORT, AZ US	2015-12-03	0	0	0
FLAGSTAFF AIRPORT, AZ US	2015-12-04	0	0	0
FLAGSTAFF AIRPORT, AZ US	2015-12-05	0	0	0
FLAGSTAFF AIRPORT, AZ US	2015-12-06	0	0	0
FLAGSTAFF AIRPORT, AZ US	2015-12-07	0	0	0
FLAGSTAFF AIRPORT, AZ US	2015-12-08	0	0	0
FLAGSTAFF AIRPORT, AZ US	2015-12-09	0	0	0
FLAGSTAFF AIRPORT, AZ US	2015-12-10	0	0	0
FLAGSTAFF AIRPORT, AZ US	2015-12-11	0.41	2.1	0
FLAGSTAFF AIRPORT, AZ US	2015-12-12	0.11	1.9	3.1
FLAGSTAFF AIRPORT, AZ US	2015-12-13	0	0	3.1
FLAGSTAFF AIRPORT, AZ US	2015-12-14	0.33	6.6	2
FLAGSTAFF AIRPORT, AZ US	2015-12-15	0	0	5.9
FLAGSTAFF AIRPORT, AZ US	2015-12-16	0	0	5.1
FLAGSTAFF AIRPORT, AZ US	2015-12-17	0	0	5.1
FLAGSTAFF AIRPORT, AZ US	2015-12-18	0	0	3.9
FLAGSTAFF AIRPORT, AZ US	2015-12-19	0	0	3.1
FLAGSTAFF AIRPORT, AZ US	2015-12-20	0.1	1.9	3.1
FLAGSTAFF AIRPORT, AZ US	2015-12-21	0	0	3.9
FLAGSTAFF AIRPORT, AZ US	2015-12-22	0.04	0	3.1
FLAGSTAFF AIRPORT, AZ US	2015-12-23	0.01	0	3.1
FLAGSTAFF AIRPORT, AZ US	2015-12-24	0.01	0	3.1
FLAGSTAFF AIRPORT, AZ US	2015-12-25	0.02	0.4	3.1
FLAGSTAFF AIRPORT, AZ US	2015-12-26	0	0	3.1
FLAGSTAFF AIRPORT, AZ US	2015-12-27	0	0	3.1
FLAGSTAFF AIRPORT, AZ US	2015-12-28	0	0	3.1
FLAGSTAFF AIRPORT, AZ US	2015-12-29	0	0	3.1
FLAGSTAFF AIRPORT, AZ US	2015-12-30	0	0	3.1
FLAGSTAFF AIRPORT, AZ US	2015-12-31	0	0	2
FLAGSTAFF AIRPORT, AZ US	2016-01-01	0	0	2
FLAGSTAFF AIRPORT, AZ US	2016-01-02	0	0	2
FLAGSTAFF AIRPORT, AZ US	2016-01-03	0	0	2
FLAGSTAFF AIRPORT, AZ US	2016-01-04	0.35	4.5	2
FLAGSTAFF AIRPORT, AZ US	2016-01-05	0.37	2.4	7.1
FLAGSTAFF AIRPORT, AZ US	2016-01-06	0.89	12.3	13
FLAGSTAFF AIRPORT, AZ US	2016-01-07	1.08	11.5	18.9
FLAGSTAFF AIRPORT, AZ US	2016-01-08	0	0.2	22
FLAGSTAFF AIRPORT, AZ US	2016-01-09	0	0	20.1
FLAGSTAFF AIRPORT, AZ US	2016-01-10	0	0	18.9
FLAGSTAFF AIRPORT, AZ US	2016-01-11	0	0	16.9
FLAGSTAFF AIRPORT, AZ US	2016-01-12	0	0	16.1
FLAGSTAFF AIRPORT, AZ US	2016-01-13	0	0	15
FLAGSTAFF AIRPORT, AZ US	2016-01-14	0	0	15
FLAGSTAFF AIRPORT, AZ US	2016-01-15	0.21	3	14.2
FLAGSTAFF AIRPORT, AZ US	2016-01-16	0	0	16.9
FLAGSTAFF AIRPORT, AZ US	2016-01-17	0	0	15
FLAGSTAFF AIRPORT, AZ US	2016-01-18	0	0	15
FLAGSTAFF AIRPORT, AZ US	2016-01-19	0.01	0.1	14.2
FLAGSTAFF AIRPORT, AZ US	2016-01-20	0	0	14.2
FLAGSTAFF AIRPORT, AZ US	2016-01-21	0	0	13
FLAGSTAFF AIRPORT, AZ US	2016-01-22	0	0	13
FLAGSTAFF AIRPORT, AZ US	2016-01-23	0	0	11.8
FLAGSTAFF AIRPORT, AZ US	2016-01-24	0	0	11.8
FLAGSTAFF AIRPORT, AZ US	2016-01-25	0	0	11.8
FLAGSTAFF AIRPORT, AZ US	2016-01-26	0	0	11.8
FLAGSTAFF AIRPORT, AZ US	2016-01-27	0	0	11
FLAGSTAFF AIRPORT, AZ US	2016-01-28	0	0	11
FLAGSTAFF AIRPORT, AZ US	2016-01-29	0	0	11
FLAGSTAFF AIRPORT, AZ US	2016-01-30	0	0	9.8
FLAGSTAFF AIRPORT, AZ US	2016-01-31	0.5	2.4	9.8
FLAGSTAFF AIRPORT, AZ US	2016-02-01	0.37	7.8	13
FLAGSTAFF AIRPORT, AZ US	2016-02-02	0	0	14.2
FLAGSTAFF AIRPORT, AZ US	2016-02-03	0	0	11.8
FLAGSTAFF AIRPORT, AZ US	2016-02-04	0	0	11.8
FLAGSTAFF AIRPORT, AZ US	2016-02-05	0	0	11.8
FLAGSTAFF AIRPORT, AZ US	2016-02-06	0	0	11
FLAGSTAFF AIRPORT, AZ US	2016-02-07	0	0	11
FLAGSTAFF AIRPORT, AZ US	2016-02-08	0	0	9.8
FLAGSTAFF AIRPORT, AZ US	2016-02-09	0	0	9.1
FLAGSTAFF AIRPORT, AZ US	2016-02-10	0	0	7.9
FLAGSTAFF AIRPORT, AZ US	2016-02-11	0	0	7.1
FLAGSTAFF AIRPORT, AZ US	2016-02-12	0	0	5.9
FLAGSTAFF AIRPORT, AZ US	2016-02-13	0	0	5.1
FLAGSTAFF AIRPORT, AZ US	2016-02-14	0	0	3.1
FLAGSTAFF AIRPORT, AZ US	2016-02-15	0	0	1.2
FLAGSTAFF AIRPORT, AZ US	2016-02-16	0	0	0
FLAGSTAFF AIRPORT, AZ US	2016-02-17	0	0	0
FLAGSTAFF AIRPORT, AZ US	2016-02-18	0	0	0
FLAGSTAFF AIRPORT, AZ US	2016-02-19	0	0	0
FLAGSTAFF AIRPORT, AZ US	2016-02-20	0	0	0
FLAGSTAFF AIRPORT, AZ US	2016-02-21	0	0	0
FLAGSTAFF AIRPORT, AZ US	2016-02-22	0	0	0
FLAGSTAFF AIRPORT, AZ US	2016-02-23	0	0	0
FLAGSTAFF AIRPORT, AZ US	2016-02-24	0	0	0
FLAGSTAFF AIRPORT, AZ US	2016-02-25	0	0	0
FLAGSTAFF AIRPORT, AZ US	2016-02-26	0	0	0
FLAGSTAFF AIRPORT, AZ US	2016-02-27	0	0	0
FLAGSTAFF AIRPORT, AZ US	2016-02-28	0	0	0
FLAGSTAFF AIRPORT, AZ US	2016-02-29	0	0	0
FLAGSTAFF AIRPORT, AZ US	2016-03-01	0	0	0
FLAGSTAFF AIRPORT, AZ US	2016-03-02	0	0	0
FLAGSTAFF AIRPORT, AZ US	2016-03-03	0	0	0
FLAGSTAFF AIRPORT, AZ US	2016-03-04	0	0	0
FLAGSTAFF AIRPORT, AZ US	2016-03-05	0	0	0
FLAGSTAFF AIRPORT, AZ US	2016-03-06	0.21	0.5	0
FLAGSTAFF AIRPORT, AZ US	2016-03-07	0.01	0	0
FLAGSTAFF AIRPORT, AZ US	2016-03-08	0	0	0
FLAGSTAFF AIRPORT, AZ US	2016-03-09	0	0	0
FLAGSTAFF AIRPORT, AZ US	2016-03-10	0	0	0
FLAGSTAFF AIRPORT, AZ US	2016-03-11	0	0	0
FLAGSTAFF AIRPORT, AZ US	2016-03-12	0	0	0
FLAGSTAFF AIRPORT, AZ US	2016-03-13	0	0	0
FLAGSTAFF AIRPORT, AZ US	2016-03-14	0	0	0
FLAGSTAFF AIRPORT, AZ US	2016-03-15	0	0	0
FLAGSTAFF AIRPORT, AZ US	2016-03-16	0	0	0
FLAGSTAFF AIRPORT, AZ US	2016-03-17	0	0	0
FLAGSTAFF AIRPORT, AZ US	2016-03-18	0	0	0
FLAGSTAFF AIRPORT, AZ US	2016-03-19	0	0	0
FLAGSTAFF AIRPORT, AZ US	2016-03-20	0	0	0
FLAGSTAFF AIRPORT, AZ US	2016-03-21	0	0	0
FLAGSTAFF AIRPORT, AZ US	2016-03-22	0	0	0
FLAGSTAFF AIRPORT, AZ US	2016-03-23	0	0	0
FLAGSTAFF AIRPORT, AZ US	2016-03-24	0	0	0
FLAGSTAFF AIRPORT, AZ US	2016-03-25	0	0	0
FLAGSTAFF AIRPORT, AZ US	2016-03-26	0	0	0
FLAGSTAFF AIRPORT, AZ US	2016-03-27	0	0	0
FLAGSTAFF AIRPORT, AZ US	2016-03-28	0.01	0	0
FLAGSTAFF AIRPORT, AZ US	2016-03-29	0.07	0	0
FLAGSTAFF AIRPORT, AZ US	2016-03-30	0.07	0.7	1.2
FLAGSTAFF AIRPORT, AZ US	2016-03-31	0	0	0
FLAGSTAFF AIRPORT, AZ US	2016-04-01	0	0	0
FLAGSTAFF AIRPORT, AZ US	2016-04-02	0	0	0
FLAGSTAFF AIRPORT, AZ US	2016-04-03	0	0	0
FLAGSTAFF AIRPORT, AZ US	2016-04-04	0	0	0
FLAGSTAFF AIRPORT, AZ US	2016-04-05	0	0	0
FLAGSTAFF AIRPORT, AZ US	2016-04-06	0	0	0
FLAGSTAFF AIRPORT, AZ US	2016-04-07	0	0	0
FLAGSTAFF AIRPORT, AZ US	2016-04-08	0.48	0	0
FLAGSTAFF AIRPORT, AZ US	2016-04-09	0	0	0
FLAGSTAFF AIRPORT, AZ US	2016-04-10	0.13	0	0
FLAGSTAFF AIRPORT, AZ US	2016-04-11	0	0	0
FLAGSTAFF AIRPORT, AZ US	2016-04-12	0.02	0	0
FLAGSTAFF AIRPORT, AZ US	2016-04-13	0	0	0
FLAGSTAFF AIRPORT, AZ US	2016-04-14	0	0	0
FLAGSTAFF AIRPORT, AZ US	2016-04-15	0.15	3	0
FLAGSTAFF AIRPORT, AZ US	2016-04-16	0.01	0.2	1.2
FLAGSTAFF AIRPORT, AZ US	2016-04-17	0	0	0
FLAGSTAFF AIRPORT, AZ US	2016-04-18	0	0	0
FLAGSTAFF AIRPORT, AZ US	2016-04-19	0	0	0
FLAGSTAFF AIRPORT, AZ US	2016-04-20	0	0	0
FLAGSTAFF AIRPORT, AZ US	2016-04-21	0	0	0
FLAGSTAFF AIRPORT, AZ US	2016-04-22	0	0	0
FLAGSTAFF AIRPORT, AZ US	2016-04-23	0	0	0
FLAGSTAFF AIRPORT, AZ US	2016-04-24	0	0	0
FLAGSTAFF AIRPORT, AZ US	2016-04-25	0.04	0.3	0
FLAGSTAFF AIRPORT, AZ US	2016-04-26	0	0	0
FLAGSTAFF AIRPORT, AZ US	2016-04-27	0	0	0
FLAGSTAFF AIRPORT, AZ US	2016-04-28	0	0	0
FLAGSTAFF AIRPORT, AZ US	2016-04-29	0.08	0	0
FLAGSTAFF AIRPORT, AZ US	2016-04-30	0.39	0	0
FLAGSTAFF AIRPORT, AZ US	2016-05-01	0.62	1.9	1.2
FLAGSTAFF AIRPORT, AZ US	2016-05-02	0.08	0	0
FLAGSTAFF AIRPORT, AZ US	2016-05-03	0	0	0
FLAGSTAFF AIRPORT, AZ US	2016-05-04	0	0	0
FLAGSTAFF AIRPORT, AZ US	2016-05-05	0	0	0
FLAGSTAFF AIRPORT, AZ US	2016-05-06	0	0	0
FLAGSTAFF AIRPORT, AZ US	2016-05-07	0.09	0	0
FLAGSTAFF AIRPORT, AZ US	2016-05-08	0.28	0	0
FLAGSTAFF AIRPORT, AZ US	2016-05-09	0	0	0
FLAGSTAFF AIRPORT, AZ US	2016-05-10	0	0	0
FLAGSTAFF AIRPORT, AZ US	2016-05-11	0	0	0
FLAGSTAFF AIRPORT, AZ US	2016-05-12	0	0	0
FLAGSTAFF AIRPORT, AZ US	2016-05-13	0	0	0
FLAGSTAFF AIRPORT, AZ US	2016-05-14	0.01	0	0
FLAGSTAFF AIRPORT, AZ US	2016-05-15	0	0	0
FLAGSTAFF AIRPORT, AZ US	2016-05-16	0.05	0	0
FLAGSTAFF AIRPORT, AZ US	2016-05-17	0.39	0	0
FLAGSTAFF AIRPORT, AZ US	2016-05-18	0.05	0	0
FLAGSTAFF AIRPORT, AZ US	2016-05-19	0	0	0
FLAGSTAFF AIRPORT, AZ US	2016-05-20	0	0	0
FLAGSTAFF AIRPORT, AZ US	2016-05-21	0	0	0
FLAGSTAFF AIRPORT, AZ US	2016-05-22	0	0	0
FLAGSTAFF AIRPORT, AZ US	2016-05-23	0	0	0
FLAGSTAFF AIRPORT, AZ US	2016-05-24	0	0	0
FLAGSTAFF AIRPORT, AZ US	2016-05-25	0	0	0
FLAGSTAFF AIRPORT, AZ US	2016-05-26	0	0	0
FLAGSTAFF AIRPORT, AZ US	2016-05-27	0	0	0
FLAGSTAFF AIRPORT, AZ US	2016-05-28	0	0	0
FLAGSTAFF AIRPORT, AZ US	2016-05-29	0	0	0
FLAGSTAFF AIRPORT, AZ US	2016-05-30	0	0	0
FLAGSTAFF AIRPORT, AZ US	2016-05-31	0	0	0
FLAGSTAFF AIRPORT, AZ US	2016-06-01	0	0	0
FLAGSTAFF AIRPORT, AZ US	2016-06-02	0	0	0
FLAGSTAFF AIRPORT, AZ US	2016-06-03	0	0	0
FLAGSTAFF AIRPORT, AZ US	2016-06-04	0	0	0
FLAGSTAFF AIRPORT, AZ US	2016-06-05	0	0	0
FLAGSTAFF AIRPORT, AZ US	2016-06-06	0	0	0
FLAGSTAFF AIRPORT, AZ US	2016-06-07	0	0	0
FLAGSTAFF AIRPORT, AZ US	2016-06-08	0	0	0
FLAGSTAFF AIRPORT, AZ US	2016-06-09	0	0	0
FLAGSTAFF AIRPORT, AZ US	2016-06-10	0.27	0	0
FLAGSTAFF AIRPORT, AZ US	2016-06-11	0.01	0	0
FLAGSTAFF AIRPORT, AZ US	2016-06-12	0	0	0
FLAGSTAFF AIRPORT, AZ US	2016-06-13	0.02	0	0
FLAGSTAFF AIRPORT, AZ US	2016-06-14	0	0	0
FLAGSTAFF AIRPORT, AZ US	2016-06-15	0	0	0
FLAGSTAFF AIRPORT, AZ US	2016-06-16	0	0	0
FLAGSTAFF AIRPORT, AZ US	2016-06-17	0	0	0
FLAGSTAFF AIRPORT, AZ US	2016-06-18	0	0	0
FLAGSTAFF AIRPORT, AZ US	2016-06-19	0	0	0
FLAGSTAFF AIRPORT, AZ US	2016-06-20	0	0	0
FLAGSTAFF AIRPORT, AZ US	2016-06-21	0.45	0	0
FLAGSTAFF AIRPORT, AZ US	2016-06-22	0	0	0
FLAGSTAFF AIRPORT, AZ US	2016-06-23	0	0	0
FLAGSTAFF AIRPORT, AZ US	2016-06-24	0	0	0
FLAGSTAFF AIRPORT, AZ US	2016-06-25	0	0	0
FLAGSTAFF AIRPORT, AZ US	2016-06-26	0	0	0
FLAGSTAFF AIRPORT, AZ US	2016-06-27	0	0	0
FLAGSTAFF AIRPORT, AZ US	2016-06-28	0.39	0	0
FLAGSTAFF AIRPORT, AZ US	2016-06-29	0	0	0
FLAGSTAFF AIRPORT, AZ US	2016-06-30	0.1	0	0
FLAGSTAFF AIRPORT, AZ US	2016-07-01	0.03	0	0
FLAGSTAFF AIRPORT, AZ US	2016-07-02	0.31	0	0
FLAGSTAFF AIRPORT, AZ US	2016-07-03	0	0	0
FLAGSTAFF AIRPORT, AZ US	2016-07-04	0	0	0
FLAGSTAFF AIRPORT, AZ US	2016-07-05	0	0	0
FLAGSTAFF AIRPORT, AZ US	2016-07-06	0	0	0
FLAGSTAFF AIRPORT, AZ US	2016-07-07	0	0	0
FLAGSTAFF AIRPORT, AZ US	2016-07-08	0	0	0
FLAGSTAFF AIRPORT, AZ US	2016-07-09	0	0	0
FLAGSTAFF AIRPORT, AZ US	2016-07-10	0	0	0
FLAGSTAFF AIRPORT, AZ US	2016-07-11	0	0	0
FLAGSTAFF AIRPORT, AZ US	2016-07-12	0	0	0
FLAGSTAFF AIRPORT, AZ US	2016-07-13	0	0	0
FLAGSTAFF AIRPORT, AZ US	2016-07-14	0	0	0
FLAGSTAFF AIRPORT, AZ US	2016-07-15	0	0	0
FLAGSTAFF AIRPORT, AZ US	2016-07-16	0	0	0
FLAGSTAFF AIRPORT, AZ US	2016-07-17	0	0	0
FLAGSTAFF AIRPORT, AZ US	2016-07-18	0	0	0
FLAGSTAFF AIRPORT, AZ US	2016-07-19	0.25	0	0
FLAGSTAFF AIRPORT, AZ US	2016-07-20	0.16	0	0
FLAGSTAFF AIRPORT, AZ US	2016-07-21	0.01	0	0
FLAGSTAFF AIRPORT, AZ US	2016-07-22	0	0	0
FLAGSTAFF AIRPORT, AZ US	2016-07-23	0.1	0	0
FLAGSTAFF AIRPORT, AZ US	2016-07-24	0	0	0
FLAGSTAFF AIRPORT, AZ US	2016-07-25	0.65	0	0
FLAGSTAFF AIRPORT, AZ US	2016-07-26	0.03	0	0
FLAGSTAFF AIRPORT, AZ US	2016-07-27	0	0	0
FLAGSTAFF AIRPORT, AZ US	2016-07-28	0	0	0
FLAGSTAFF AIRPORT, AZ US	2016-07-29	0.18	0	0
FLAGSTAFF AIRPORT, AZ US	2016-07-30	0.53	0	0
FLAGSTAFF AIRPORT, AZ US	2016-07-31	0.34	0	0
FLAGSTAFF AIRPORT, AZ US	2016-08-01	0.15	0	0
FLAGSTAFF AIRPORT, AZ US	2016-08-02	1.11	0	0
FLAGSTAFF AIRPORT, AZ US	2016-08-03	0.61	0	0
FLAGSTAFF AIRPORT, AZ US	2016-08-04	0.41	0	0
FLAGSTAFF AIRPORT, AZ US	2016-08-05	0.01	0	0
FLAGSTAFF AIRPORT, AZ US	2016-08-06	0.02	0	0
FLAGSTAFF AIRPORT, AZ US	2016-08-07	0	0	0
FLAGSTAFF AIRPORT, AZ US	2016-08-08	0	0	0
FLAGSTAFF AIRPORT, AZ US	2016-08-09	0	0	0
FLAGSTAFF AIRPORT, AZ US	2016-08-10	0.01	0	0
FLAGSTAFF AIRPORT, AZ US	2016-08-11	0.37	0	0
FLAGSTAFF AIRPORT, AZ US	2016-08-12	0.52	0	0
FLAGSTAFF AIRPORT, AZ US	2016-08-13	0	0	0
FLAGSTAFF AIRPORT, AZ US	2016-08-14	0	0	0
FLAGSTAFF AIRPORT, AZ US	2016-08-15	0.02	0	0
FLAGSTAFF AIRPORT, AZ US	2016-08-16	0.01	0	0
FLAGSTAFF AIRPORT, AZ US	2016-08-17	0.03	0	0
FLAGSTAFF AIRPORT, AZ US	2016-08-18	0.04	0	0
FLAGSTAFF AIRPORT, AZ US	2016-08-19	0.04	0	0
FLAGSTAFF AIRPORT, AZ US	2016-08-20	0.25	0	0
FLAGSTAFF AIRPORT, AZ US	2016-08-21	0	0	0
FLAGSTAFF AIRPORT, AZ US	2016-08-22	0	0	0
FLAGSTAFF AIRPORT, AZ US	2016-08-23	0.01	0	0
FLAGSTAFF AIRPORT, AZ US	2016-08-24	0.04	0	0
FLAGSTAFF AIRPORT, AZ US	2016-08-25	0.34	0	0
FLAGSTAFF AIRPORT, AZ US	2016-08-26	1.41	0	0
FLAGSTAFF AIRPORT, AZ US	2016-08-27	0.94	0	0
FLAGSTAFF AIRPORT, AZ US	2016-08-28	0	0	0
FLAGSTAFF AIRPORT, AZ US	2016-08-29	0	0	0
FLAGSTAFF AIRPORT, AZ US	2016-08-30	0	0	0
FLAGSTAFF AIRPORT, AZ US	2016-08-31	0	0	0
FLAGSTAFF AIRPORT, AZ US	2016-09-01	0.06	0	0
FLAGSTAFF AIRPORT, AZ US	2016-09-02	0	0	0
FLAGSTAFF AIRPORT, AZ US	2016-09-03	0	0	0
FLAGSTAFF AIRPORT, AZ US	2016-09-04	0	0	0
FLAGSTAFF AIRPORT, AZ US	2016-09-05	0	0	0
FLAGSTAFF AIRPORT, AZ US	2016-09-06	0	0	0
FLAGSTAFF AIRPORT, AZ US	2016-09-07	0.03	0	0
FLAGSTAFF AIRPORT, AZ US	2016-09-08	0	0	0
FLAGSTAFF AIRPORT, AZ US	2016-09-09	0	0	0
FLAGSTAFF AIRPORT, AZ US	2016-09-10	0	0	0
FLAGSTAFF AIRPORT, AZ US	2016-09-11	0	0	0
FLAGSTAFF AIRPORT, AZ US	2016-09-12	0	0	0
FLAGSTAFF AIRPORT, AZ US	2016-09-13	0	0	0
FLAGSTAFF AIRPORT, AZ US	2016-09-14	0	0	0
FLAGSTAFF AIRPORT, AZ US	2016-09-15	0	0	0
FLAGSTAFF AIRPORT, AZ US	2016-09-16	0	0	0
FLAGSTAFF AIRPORT, AZ US	2016-09-17	0	0	0
FLAGSTAFF AIRPORT, AZ US	2016-09-18	0	0	0
FLAGSTAFF AIRPORT, AZ US	2016-09-19	0	0	0
FLAGSTAFF AIRPORT, AZ US	2016-09-20	0.48	0	0
FLAGSTAFF AIRPORT, AZ US	2016-09-21	0	0	0
FLAGSTAFF AIRPORT, AZ US	2016-09-22	0.21	0	0
FLAGSTAFF AIRPORT, AZ US	2016-09-23	0.1	0	0
FLAGSTAFF AIRPORT, AZ US	2016-09-24	0	0	0
FLAGSTAFF AIRPORT, AZ US	2016-09-25	0	0	0
FLAGSTAFF AIRPORT, AZ US	2016-09-26	0	0	0
FLAGSTAFF AIRPORT, AZ US	2016-09-27	0.3	0	0
FLAGSTAFF AIRPORT, AZ US	2016-09-28	0.28	0	0
FLAGSTAFF AIRPORT, AZ US	2016-09-29	0.08	0	0
FLAGSTAFF AIRPORT, AZ US	2016-09-30	0	0	0
FLAGSTAFF AIRPORT, AZ US	2016-10-01	0	0	0
FLAGSTAFF AIRPORT, AZ US	2016-10-02	0.02	0	0
FLAGSTAFF AIRPORT, AZ US	2016-10-03	0	0	0
FLAGSTAFF AIRPORT, AZ US	2016-10-04	0	0	0
FLAGSTAFF AIRPORT, AZ US	2016-10-05	0	0	0
FLAGSTAFF AIRPORT, AZ US	2016-10-06	0	0	0
FLAGSTAFF AIRPORT, AZ US	2016-10-07	0	0	0
FLAGSTAFF AIRPORT, AZ US	2016-10-08	0.08	0	0
FLAGSTAFF AIRPORT, AZ US	2016-10-09	0.26	0	0
FLAGSTAFF AIRPORT, AZ US	2016-10-10	0	0	0
FLAGSTAFF AIRPORT, AZ US	2016-10-11	0	0	0
FLAGSTAFF AIRPORT, AZ US	2016-10-12	0	0	0
FLAGSTAFF AIRPORT, AZ US	2016-10-13	0	0	0
FLAGSTAFF AIRPORT, AZ US	2016-10-14	0	0	0
FLAGSTAFF AIRPORT, AZ US	2016-10-15	0	0	0
FLAGSTAFF AIRPORT, AZ US	2016-10-16	0	0	0
FLAGSTAFF AIRPORT, AZ US	2016-10-17	0	0	0
FLAGSTAFF AIRPORT, AZ US	2016-10-18	0	0	0
FLAGSTAFF AIRPORT, AZ US	2016-10-19	0	0	0
FLAGSTAFF AIRPORT, AZ US	2016-10-20	0	0	0
FLAGSTAFF AIRPORT, AZ US	2016-10-21	0	0	0
FLAGSTAFF AIRPORT, AZ US	2016-10-22	0	0	0
FLAGSTAFF AIRPORT, AZ US	2016-10-23	0	0	0
FLAGSTAFF AIRPORT, AZ US	2016-10-24	0.2	0	0
FLAGSTAFF AIRPORT, AZ US	2016-10-25	0.11	0	0
FLAGSTAFF AIRPORT, AZ US	2016-10-26	0	0	0
FLAGSTAFF AIRPORT, AZ US	2016-10-27	0	0	0
FLAGSTAFF AIRPORT, AZ US	2016-10-28	0	0	0
FLAGSTAFF AIRPORT, AZ US	2016-10-29	0	0	0
FLAGSTAFF AIRPORT, AZ US	2016-10-30	0	0	0
FLAGSTAFF AIRPORT, AZ US	2016-10-31	0	0	0
FLAGSTAFF AIRPORT, AZ US	2016-11-01	0	0	0
FLAGSTAFF AIRPORT, AZ US	2016-11-02	0	0	0
FLAGSTAFF AIRPORT, AZ US	2016-11-03	0.13	0	0
FLAGSTAFF AIRPORT, AZ US	2016-11-04	0	0	0
FLAGSTAFF AIRPORT, AZ US	2016-11-05	0	0	0
FLAGSTAFF AIRPORT, AZ US	2016-11-06	0	0	0
FLAGSTAFF AIRPORT, AZ US	2016-11-07	0	0	0
FLAGSTAFF AIRPORT, AZ US	2016-11-08	0	0	0
FLAGSTAFF AIRPORT, AZ US	2016-11-09	0	0	0
FLAGSTAFF AIRPORT, AZ US	2016-11-10	0	0	0
FLAGSTAFF AIRPORT, AZ US	2016-11-11	0	0	0
FLAGSTAFF AIRPORT, AZ US	2016-11-12	0	0	0
FLAGSTAFF AIRPORT, AZ US	2016-11-13	0	0	0
FLAGSTAFF AIRPORT, AZ US	2016-11-14	0	0	0
FLAGSTAFF AIRPORT, AZ US	2016-11-15	0	0	0
FLAGSTAFF AIRPORT, AZ US	2016-11-16	0	0	0
FLAGSTAFF AIRPORT, AZ US	2016-11-17	0	0	0
FLAGSTAFF AIRPORT, AZ US	2016-11-18	0	0	0
FLAGSTAFF AIRPORT, AZ US	2016-11-19	0	0	0
FLAGSTAFF AIRPORT, AZ US	2016-11-20	0.62	0	0
FLAGSTAFF AIRPORT, AZ US	2016-11-21	0.79	0	0
FLAGSTAFF AIRPORT, AZ US	2016-11-22	0	0	0
FLAGSTAFF AIRPORT, AZ US	2016-11-23	0	0	0
FLAGSTAFF AIRPORT, AZ US	2016-11-24	0	0	0
FLAGSTAFF AIRPORT, AZ US	2016-11-25	0	0	0
FLAGSTAFF AIRPORT, AZ US	2016-11-26	0	0	0
FLAGSTAFF AIRPORT, AZ US	2016-11-27	0.36	4.7	0
FLAGSTAFF AIRPORT, AZ US	2016-11-28	0.08	0.8	3.9
FLAGSTAFF AIRPORT, AZ US	2016-11-29	0	0	5.1
FLAGSTAFF AIRPORT, AZ US	2016-11-30	0	0	3
FLAGSTAFF AIRPORT, AZ US	2016-12-01	0	0	2
FLAGSTAFF AIRPORT, AZ US	2016-12-02	0	0	2
FLAGSTAFF AIRPORT, AZ US	2016-12-03	0	0	2
FLAGSTAFF AIRPORT, AZ US	2016-12-04	0	0	1.2
FLAGSTAFF AIRPORT, AZ US	2016-12-05	0	0	0
FLAGSTAFF AIRPORT, AZ US	2016-12-06	0	0	0
FLAGSTAFF AIRPORT, AZ US	2016-12-07	0	0	0
FLAGSTAFF AIRPORT, AZ US	2016-12-08	0	0	0
FLAGSTAFF AIRPORT, AZ US	2016-12-09	0	0	0
FLAGSTAFF AIRPORT, AZ US	2016-12-10	0	0	0
FLAGSTAFF AIRPORT, AZ US	2016-12-11	0	0	0
FLAGSTAFF AIRPORT, AZ US	2016-12-12	0	0	0
FLAGSTAFF AIRPORT, AZ US	2016-12-13	0	0	0
FLAGSTAFF AIRPORT, AZ US	2016-12-14	0	0	0
FLAGSTAFF AIRPORT, AZ US	2016-12-15	0	0	0
FLAGSTAFF AIRPORT, AZ US	2016-12-16	1.11	0	0
FLAGSTAFF AIRPORT, AZ US	2016-12-17	0.01	0.1	0
FLAGSTAFF AIRPORT, AZ US	2016-12-18	0	0	0
FLAGSTAFF AIRPORT, AZ US	2016-12-19	0	0	0
FLAGSTAFF AIRPORT, AZ US	2016-12-20	0	0	0
FLAGSTAFF AIRPORT, AZ US	2016-12-21	0.35	0	0
FLAGSTAFF AIRPORT, AZ US	2016-12-22	1.48	0	0
FLAGSTAFF AIRPORT, AZ US	2016-12-23	0.04	0	0
FLAGSTAFF AIRPORT, AZ US	2016-12-24	0.84	10.1	0
FLAGSTAFF AIRPORT, AZ US	2016-12-25	0.26	4.6	11.8
FLAGSTAFF AIRPORT, AZ US	2016-12-26	0	0	11
FLAGSTAFF AIRPORT, AZ US	2016-12-27	0	0	7.1
FLAGSTAFF AIRPORT, AZ US	2016-12-28	0	0	5.1
FLAGSTAFF AIRPORT, AZ US	2016-12-29	0	0	3.1
FLAGSTAFF AIRPORT, AZ US	2016-12-30	0.23	0	3.1
FLAGSTAFF AIRPORT, AZ US	2016-12-31	0.1	0	3.1
FLAGSTAFF AIRPORT, AZ US	2017-01-01	0.54	3.8	3.9
FLAGSTAFF AIRPORT, AZ US	2017-01-02	0.07	1	5.9
FLAGSTAFF AIRPORT, AZ US	2017-01-03	0	0	5.9
FLAGSTAFF AIRPORT, AZ US	2017-01-04	0	0	3.9
FLAGSTAFF AIRPORT, AZ US	2017-01-05	0.42	0	2
FLAGSTAFF AIRPORT, AZ US	2017-01-06	0.03	0	2
FLAGSTAFF AIRPORT, AZ US	2017-01-07	0	0	1.2
FLAGSTAFF AIRPORT, AZ US	2017-01-08	0.02	0	0
FLAGSTAFF AIRPORT, AZ US	2017-01-09	0.24	0	0
FLAGSTAFF AIRPORT, AZ US	2017-01-10	0	0	0
FLAGSTAFF AIRPORT, AZ US	2017-01-11	0	0	0
FLAGSTAFF AIRPORT, AZ US	2017-01-12	0	0	0
FLAGSTAFF AIRPORT, AZ US	2017-01-13	0.05	0	0
FLAGSTAFF AIRPORT, AZ US	2017-01-14	0.76	1.7	1.2
FLAGSTAFF AIRPORT, AZ US	2017-01-15	0	0	1.2
FLAGSTAFF AIRPORT, AZ US	2017-01-16	0.01	0.1	0
FLAGSTAFF AIRPORT, AZ US	2017-01-17	0	0	0
FLAGSTAFF AIRPORT, AZ US	2017-01-18	0	0	0
FLAGSTAFF AIRPORT, AZ US	2017-01-19	0.41	6.1	0
FLAGSTAFF AIRPORT, AZ US	2017-01-20	0.71	12.6	5.9
FLAGSTAFF AIRPORT, AZ US	2017-01-21	0.24	5.7	16.9
FLAGSTAFF AIRPORT, AZ US	2017-01-22	0.11	1.4	14.2
FLAGSTAFF AIRPORT, AZ US	2017-01-23	0.61	7.3	15
FLAGSTAFF AIRPORT, AZ US	2017-01-24	0.31	3.3	20.9
FLAGSTAFF AIRPORT, AZ US	2017-01-25	0.02	0.6	20.9
FLAGSTAFF AIRPORT, AZ US	2017-01-26	0	0	20.1
FLAGSTAFF AIRPORT, AZ US	2017-01-27	0	0	18.9
FLAGSTAFF AIRPORT, AZ US	2017-01-28	0	0	16.9
FLAGSTAFF AIRPORT, AZ US	2017-01-29	0	0	15
FLAGSTAFF AIRPORT, AZ US	2017-01-30	0	0	11.8
FLAGSTAFF AIRPORT, AZ US	2017-01-31	0	0	9.8
FLAGSTAFF AIRPORT, AZ US	2017-02-01	0	0	9.1
FLAGSTAFF AIRPORT, AZ US	2017-02-02	0	0	7.1
FLAGSTAFF AIRPORT, AZ US	2017-02-03	0	0	5.9
FLAGSTAFF AIRPORT, AZ US	2017-02-04	0	0	3.9
FLAGSTAFF AIRPORT, AZ US	2017-02-05	0	0	3.9
FLAGSTAFF AIRPORT, AZ US	2017-02-06	0	0	3.1
FLAGSTAFF AIRPORT, AZ US	2017-02-07	0.04	0	2
FLAGSTAFF AIRPORT, AZ US	2017-02-08	0	0	2
FLAGSTAFF AIRPORT, AZ US	2017-02-09	0	0	1.2
FLAGSTAFF AIRPORT, AZ US	2017-02-10	0	0	0
FLAGSTAFF AIRPORT, AZ US	2017-02-11	0.05	0	0
FLAGSTAFF AIRPORT, AZ US	2017-02-12	0.2	0	0
FLAGSTAFF AIRPORT, AZ US	2017-02-13	0	0	0
FLAGSTAFF AIRPORT, AZ US	2017-02-14	0	0	0
FLAGSTAFF AIRPORT, AZ US	2017-02-15	0	0	0
FLAGSTAFF AIRPORT, AZ US	2017-02-16	0	0	0
FLAGSTAFF AIRPORT, AZ US	2017-02-17	0.02	0	0
FLAGSTAFF AIRPORT, AZ US	2017-02-18	0.3	0	0
FLAGSTAFF AIRPORT, AZ US	2017-02-19	0.11	1.9	2
FLAGSTAFF AIRPORT, AZ US	2017-02-20	0	0	0
FLAGSTAFF AIRPORT, AZ US	2017-02-21	0	0	0
FLAGSTAFF AIRPORT, AZ US	2017-02-22	0	0	0
FLAGSTAFF AIRPORT, AZ US	2017-02-23	0	0	0
FLAGSTAFF AIRPORT, AZ US	2017-02-24	0	0	0
FLAGSTAFF AIRPORT, AZ US	2017-02-25	0	0	0
FLAGSTAFF AIRPORT, AZ US	2017-02-26	0	0	0
FLAGSTAFF AIRPORT, AZ US	2017-02-27	0.86	9.1	0
FLAGSTAFF AIRPORT, AZ US	2017-02-28	0.75	7.2	16.1
FLAGSTAFF AIRPORT, AZ US	2017-03-01	0	0	9.1
FLAGSTAFF AIRPORT, AZ US	2017-03-02	0	0	7.9
FLAGSTAFF AIRPORT, AZ US	2017-03-03	0	0	5.9
FLAGSTAFF AIRPORT, AZ US	2017-03-04	0	0	3.1
FLAGSTAFF AIRPORT, AZ US	2017-03-05	0	0	1.2
FLAGSTAFF AIRPORT, AZ US	2017-03-06	0	0	0
FLAGSTAFF AIRPORT, AZ US	2017-03-07	0	0	0
FLAGSTAFF AIRPORT, AZ US	2017-03-08	0	0	0
FLAGSTAFF AIRPORT, AZ US	2017-03-09	0	0	0
FLAGSTAFF AIRPORT, AZ US	2017-03-10	0	0	0
FLAGSTAFF AIRPORT, AZ US	2017-03-11	0	0	0
FLAGSTAFF AIRPORT, AZ US	2017-03-12	0	0	0
FLAGSTAFF AIRPORT, AZ US	2017-03-13	0	0	0
FLAGSTAFF AIRPORT, AZ US	2017-03-14	0	0	0
FLAGSTAFF AIRPORT, AZ US	2017-03-15	0	0	0
FLAGSTAFF AIRPORT, AZ US	2017-03-16	0	0	0
FLAGSTAFF AIRPORT, AZ US	2017-03-17	0	0	0
FLAGSTAFF AIRPORT, AZ US	2017-03-18	0	0	0
FLAGSTAFF AIRPORT, AZ US	2017-03-19	0	0	0
FLAGSTAFF AIRPORT, AZ US	2017-03-20	0	0	0
FLAGSTAFF AIRPORT, AZ US	2017-03-21	0	0	0
FLAGSTAFF AIRPORT, AZ US	2017-03-22	0.46	0.8	0
FLAGSTAFF AIRPORT, AZ US	2017-03-23	0.75	7.2	5.1
FLAGSTAFF AIRPORT, AZ US	2017-03-24	0	0	3.9
FLAGSTAFF AIRPORT, AZ US	2017-03-25	0.01	0	0
FLAGSTAFF AIRPORT, AZ US	2017-03-26	0	0	0
FLAGSTAFF AIRPORT, AZ US	2017-03-27	0.21	0	0
FLAGSTAFF AIRPORT, AZ US	2017-03-28	0	0	0
FLAGSTAFF AIRPORT, AZ US	2017-03-29	0	0	0
FLAGSTAFF AIRPORT, AZ US	2017-03-30	0.09	0.3	0
FLAGSTAFF AIRPORT, AZ US	2017-03-31	0.27	3.2	2
FLAGSTAFF AIRPORT, AZ US	2017-04-01	0	0	2
FLAGSTAFF AIRPORT, AZ US	2017-04-02	0	0	0
FLAGSTAFF AIRPORT, AZ US	2017-04-03	0.17	1.7	0
FLAGSTAFF AIRPORT, AZ US	2017-04-04	0	0	2
FLAGSTAFF AIRPORT, AZ US	2017-04-05	0	0	0
FLAGSTAFF AIRPORT, AZ US	2017-04-06	0	0	0
FLAGSTAFF AIRPORT, AZ US	2017-04-07	0	0	0
FLAGSTAFF AIRPORT, AZ US	2017-04-08	0	0	0
FLAGSTAFF AIRPORT, AZ US	2017-04-09	0	0	0
FLAGSTAFF AIRPORT, AZ US	2017-04-10	0	0	0
FLAGSTAFF AIRPORT, AZ US	2017-04-11	0	0	0
FLAGSTAFF AIRPORT, AZ US	2017-04-12	0	0	0
FLAGSTAFF AIRPORT, AZ US	2017-04-13	0	0	0
FLAGSTAFF AIRPORT, AZ US	2017-04-14	0	0	0
FLAGSTAFF AIRPORT, AZ US	2017-04-15	0	0	0
FLAGSTAFF AIRPORT, AZ US	2017-04-16	0	0	0
FLAGSTAFF AIRPORT, AZ US	2017-04-17	0	0	0
FLAGSTAFF AIRPORT, AZ US	2017-04-18	0	0	0
FLAGSTAFF AIRPORT, AZ US	2017-04-19	0	0	0
FLAGSTAFF AIRPORT, AZ US	2017-04-20	0	0	0
FLAGSTAFF AIRPORT, AZ US	2017-04-21	0	0	0
FLAGSTAFF AIRPORT, AZ US	2017-04-22	0	0	0
FLAGSTAFF AIRPORT, AZ US	2017-04-23	0	0	0
FLAGSTAFF AIRPORT, AZ US	2017-04-24	0	0	0
FLAGSTAFF AIRPORT, AZ US	2017-04-25	0	0	0
FLAGSTAFF AIRPORT, AZ US	2017-04-26	0	0	0
FLAGSTAFF AIRPORT, AZ US	2017-04-27	0	0	0
FLAGSTAFF AIRPORT, AZ US	2017-04-28	0	0	0
FLAGSTAFF AIRPORT, AZ US	2017-04-29	0	0	0
FLAGSTAFF AIRPORT, AZ US	2017-04-30	0	0	0
FLAGSTAFF AIRPORT, AZ US	2017-05-01	0	0	0
FLAGSTAFF AIRPORT, AZ US	2017-05-02	0	0	0
FLAGSTAFF AIRPORT, AZ US	2017-05-03	0	0	0
FLAGSTAFF AIRPORT, AZ US	2017-05-04	0	0	0
FLAGSTAFF AIRPORT, AZ US	2017-05-05	0	0	0
FLAGSTAFF AIRPORT, AZ US	2017-05-06	0	0	0
FLAGSTAFF AIRPORT, AZ US	2017-05-07	0	0	0
FLAGSTAFF AIRPORT, AZ US	2017-05-08	0.05	0	0
FLAGSTAFF AIRPORT, AZ US	2017-05-09	0.49	0.2	0
FLAGSTAFF AIRPORT, AZ US	2017-05-10	0	0	0
FLAGSTAFF AIRPORT, AZ US	2017-05-11	0	0	0
FLAGSTAFF AIRPORT, AZ US	2017-05-12	0	0	0
FLAGSTAFF AIRPORT, AZ US	2017-05-13	0	0	0
FLAGSTAFF AIRPORT, AZ US	2017-05-14	0	0	0
FLAGSTAFF AIRPORT, AZ US	2017-05-15	0	0	0
FLAGSTAFF AIRPORT, AZ US	2017-05-16	0	0	0
FLAGSTAFF AIRPORT, AZ US	2017-05-17	0.17	0	0
FLAGSTAFF AIRPORT, AZ US	2017-05-18	0.08	1	0
FLAGSTAFF AIRPORT, AZ US	2017-05-19	0	0	0
FLAGSTAFF AIRPORT, AZ US	2017-05-20	0	0	0
FLAGSTAFF AIRPORT, AZ US	2017-05-21	0	0	0
FLAGSTAFF AIRPORT, AZ US	2017-05-22	0	0	0
FLAGSTAFF AIRPORT, AZ US	2017-05-23	0	0	0
FLAGSTAFF AIRPORT, AZ US	2017-05-24	0	0	0
FLAGSTAFF AIRPORT, AZ US	2017-05-25	0	0	0
FLAGSTAFF AIRPORT, AZ US	2017-05-26	0	0	0
FLAGSTAFF AIRPORT, AZ US	2017-05-27	0	0	0
FLAGSTAFF AIRPORT, AZ US	2017-05-28	0	0	0
FLAGSTAFF AIRPORT, AZ US	2017-05-29	0	0	0
FLAGSTAFF AIRPORT, AZ US	2017-05-30	0	0	0
FLAGSTAFF AIRPORT, AZ US	2017-05-31	0	0	0
FLAGSTAFF AIRPORT, AZ US	2017-06-01	0	0	0
FLAGSTAFF AIRPORT, AZ US	2017-06-02	0	0	0
FLAGSTAFF AIRPORT, AZ US	2017-06-03	0	0	0
FLAGSTAFF AIRPORT, AZ US	2017-06-04	0	0	0
FLAGSTAFF AIRPORT, AZ US	2017-06-05	0	0	0
FLAGSTAFF AIRPORT, AZ US	2017-06-06	0	0	0
FLAGSTAFF AIRPORT, AZ US	2017-06-07	0	0	0
FLAGSTAFF AIRPORT, AZ US	2017-06-08	0	0	0
FLAGSTAFF AIRPORT, AZ US	2017-06-09	0	0	0
FLAGSTAFF AIRPORT, AZ US	2017-06-10	0	0	0
FLAGSTAFF AIRPORT, AZ US	2017-06-11	0	0	0
FLAGSTAFF AIRPORT, AZ US	2017-06-12	0	0	0
FLAGSTAFF AIRPORT, AZ US	2017-06-13	0	0	0
FLAGSTAFF AIRPORT, AZ US	2017-06-14	0	0	0
FLAGSTAFF AIRPORT, AZ US	2017-06-15	0	0	0
FLAGSTAFF AIRPORT, AZ US	2017-06-16	0	0	0
FLAGSTAFF AIRPORT, AZ US	2017-06-17	0	0	0
FLAGSTAFF AIRPORT, AZ US	2017-06-18	0	0	0
FLAGSTAFF AIRPORT, AZ US	2017-06-19	0.12	0	0
FLAGSTAFF AIRPORT, AZ US	2017-06-20	0	0	0
FLAGSTAFF AIRPORT, AZ US	2017-06-21	0	0	0
FLAGSTAFF AIRPORT, AZ US	2017-06-22	0	0	0
FLAGSTAFF AIRPORT, AZ US	2017-06-23	0	0	0
FLAGSTAFF AIRPORT, AZ US	2017-06-24	0	0	0
FLAGSTAFF AIRPORT, AZ US	2017-06-25	0.05	0	0
FLAGSTAFF AIRPORT, AZ US	2017-06-26	0	0	0
FLAGSTAFF AIRPORT, AZ US	2017-06-27	0	0	0
FLAGSTAFF AIRPORT, AZ US	2017-06-28	0	0	0
FLAGSTAFF AIRPORT, AZ US	2017-06-29	0	0	0
FLAGSTAFF AIRPORT, AZ US	2017-06-30	0	0	0
FLAGSTAFF AIRPORT, AZ US	2017-07-01	0	0	0
FLAGSTAFF AIRPORT, AZ US	2017-07-02	0	0	0
FLAGSTAFF AIRPORT, AZ US	2017-07-03	0	0	0
FLAGSTAFF AIRPORT, AZ US	2017-07-04	0	0	0
FLAGSTAFF AIRPORT, AZ US	2017-07-05	0	0	0
FLAGSTAFF AIRPORT, AZ US	2017-07-06	0	0	0
FLAGSTAFF AIRPORT, AZ US	2017-07-07	0.02	0	0
FLAGSTAFF AIRPORT, AZ US	2017-07-08	0.01	0	0
FLAGSTAFF AIRPORT, AZ US	2017-07-09	0.03	0	0
FLAGSTAFF AIRPORT, AZ US	2017-07-10	0	0	0
FLAGSTAFF AIRPORT, AZ US	2017-07-11	0.19	0	0
FLAGSTAFF AIRPORT, AZ US	2017-07-12	0	0	0
FLAGSTAFF AIRPORT, AZ US	2017-07-13	0.04	0	0
FLAGSTAFF AIRPORT, AZ US	2017-07-14	0	0	0
FLAGSTAFF AIRPORT, AZ US	2017-07-15	0.06	0	0
FLAGSTAFF AIRPORT, AZ US	2017-07-16	0	0	0
FLAGSTAFF AIRPORT, AZ US	2017-07-17	0	0	0
FLAGSTAFF AIRPORT, AZ US	2017-07-18	0.56	0	0
FLAGSTAFF AIRPORT, AZ US	2017-07-19	0.1	0	0
FLAGSTAFF AIRPORT, AZ US	2017-07-20	0.13	0	0
FLAGSTAFF AIRPORT, AZ US	2017-07-21	0.17	0	0
FLAGSTAFF AIRPORT, AZ US	2017-07-22	0	0	0
FLAGSTAFF AIRPORT, AZ US	2017-07-23	1.79	0	0
FLAGSTAFF AIRPORT, AZ US	2017-07-24	0.77	0	0
FLAGSTAFF AIRPORT, AZ US	2017-07-25	0.1	0	0
FLAGSTAFF AIRPORT, AZ US	2017-07-26	0	0	0
FLAGSTAFF AIRPORT, AZ US	2017-07-27	0.15	0	0
FLAGSTAFF AIRPORT, AZ US	2017-07-28	0.31	0	0
FLAGSTAFF AIRPORT, AZ US	2017-07-29	0	0	0
FLAGSTAFF AIRPORT, AZ US	2017-07-30	0	0	0
FLAGSTAFF AIRPORT, AZ US	2017-07-31	0.05	0	0
FLAGSTAFF AIRPORT, AZ US	2017-08-01	0.01	0	0
FLAGSTAFF AIRPORT, AZ US	2017-08-02	0	0	0
FLAGSTAFF AIRPORT, AZ US	2017-08-03	0	0	0
FLAGSTAFF AIRPORT, AZ US	2017-08-04	1.05	0	0
FLAGSTAFF AIRPORT, AZ US	2017-08-05	0.25	0	0
FLAGSTAFF AIRPORT, AZ US	2017-08-06	0	0	0
FLAGSTAFF AIRPORT, AZ US	2017-08-07	0	0	0
FLAGSTAFF AIRPORT, AZ US	2017-08-08	0	0	0
FLAGSTAFF AIRPORT, AZ US	2017-08-09	0	0	0
FLAGSTAFF AIRPORT, AZ US	2017-08-10	0.59	0	0
FLAGSTAFF AIRPORT, AZ US	2017-08-11	0	0	0
FLAGSTAFF AIRPORT, AZ US	2017-08-12	0.17	0	0
FLAGSTAFF AIRPORT, AZ US	2017-08-13	0.29	0	0
FLAGSTAFF AIRPORT, AZ US	2017-08-14	0.04	0	0
FLAGSTAFF AIRPORT, AZ US	2017-08-15	0	0	0
FLAGSTAFF AIRPORT, AZ US	2017-08-16	0	0	0
FLAGSTAFF AIRPORT, AZ US	2017-08-17	0	0	0
FLAGSTAFF AIRPORT, AZ US	2017-08-18	0	0	0
FLAGSTAFF AIRPORT, AZ US	2017-08-19	0	0	0
FLAGSTAFF AIRPORT, AZ US	2017-08-20	0.19	0	0
FLAGSTAFF AIRPORT, AZ US	2017-08-21	0	0	0
FLAGSTAFF AIRPORT, AZ US	2017-08-22	0.04	0	0
FLAGSTAFF AIRPORT, AZ US	2017-08-23	0	0	0
FLAGSTAFF AIRPORT, AZ US	2017-08-24	0.39	0	0
FLAGSTAFF AIRPORT, AZ US	2017-08-25	0	0	0
FLAGSTAFF AIRPORT, AZ US	2017-08-26	0	0	0
FLAGSTAFF AIRPORT, AZ US	2017-08-27	0	0	0
FLAGSTAFF AIRPORT, AZ US	2017-08-28	0	0	0
FLAGSTAFF AIRPORT, AZ US	2017-08-29	0.27	0	0
FLAGSTAFF AIRPORT, AZ US	2017-08-30	0	0	0
FLAGSTAFF AIRPORT, AZ US	2017-08-31	0	0	0
FLAGSTAFF AIRPORT, AZ US	2017-09-01	0	0	0
FLAGSTAFF AIRPORT, AZ US	2017-09-02	0	0	0
FLAGSTAFF AIRPORT, AZ US	2017-09-03	0	0	0
FLAGSTAFF AIRPORT, AZ US	2017-09-04	0	0	0
FLAGSTAFF AIRPORT, AZ US	2017-09-05	0.01	0	0
FLAGSTAFF AIRPORT, AZ US	2017-09-06	0	0	0
FLAGSTAFF AIRPORT, AZ US	2017-09-07	0	0	0
FLAGSTAFF AIRPORT, AZ US	2017-09-08	0.09	0	0
FLAGSTAFF AIRPORT, AZ US	2017-09-09	0.02	0	0
FLAGSTAFF AIRPORT, AZ US	2017-09-10	0	0	0
FLAGSTAFF AIRPORT, AZ US	2017-09-11	0.01	0	0
FLAGSTAFF AIRPORT, AZ US	2017-09-12	0	0	0
FLAGSTAFF AIRPORT, AZ US	2017-09-13	0.2	0	0
FLAGSTAFF AIRPORT, AZ US	2017-09-14	0	0	0
FLAGSTAFF AIRPORT, AZ US	2017-09-15	0	0	0
FLAGSTAFF AIRPORT, AZ US	2017-09-16	0	0	0
FLAGSTAFF AIRPORT, AZ US	2017-09-17	0	0	0
FLAGSTAFF AIRPORT, AZ US	2017-09-18	0	0	0
FLAGSTAFF AIRPORT, AZ US	2017-09-19	0	0	0
FLAGSTAFF AIRPORT, AZ US	2017-09-20	0	0	0
FLAGSTAFF AIRPORT, AZ US	2017-09-21	0	0	0
FLAGSTAFF AIRPORT, AZ US	2017-09-22	0.02	0	0
FLAGSTAFF AIRPORT, AZ US	2017-09-23	0	0	0
FLAGSTAFF AIRPORT, AZ US	2017-09-24	0	0	0
FLAGSTAFF AIRPORT, AZ US	2017-09-25	0	0	0
FLAGSTAFF AIRPORT, AZ US	2017-09-26	0	0	0
FLAGSTAFF AIRPORT, AZ US	2017-09-27	0.07	0	0
FLAGSTAFF AIRPORT, AZ US	2017-09-28	0	0	0
FLAGSTAFF AIRPORT, AZ US	2017-09-29	0	0	0
FLAGSTAFF AIRPORT, AZ US	2017-09-30	0	0	0
FLAGSTAFF AIRPORT, AZ US	2017-10-01	0	0	0
FLAGSTAFF AIRPORT, AZ US	2017-10-02	0	0	0
FLAGSTAFF AIRPORT, AZ US	2017-10-03	0	0	0
FLAGSTAFF AIRPORT, AZ US	2017-10-04	0	0	0
FLAGSTAFF AIRPORT, AZ US	2017-10-05	0	0	0
FLAGSTAFF AIRPORT, AZ US	2017-10-06	0	0	0
FLAGSTAFF AIRPORT, AZ US	2017-10-07	0	0	0
FLAGSTAFF AIRPORT, AZ US	2017-10-08	0	0	0
FLAGSTAFF AIRPORT, AZ US	2017-10-09	0	0	0
FLAGSTAFF AIRPORT, AZ US	2017-10-10	0	0	0
FLAGSTAFF AIRPORT, AZ US	2017-10-11	0	0	0
FLAGSTAFF AIRPORT, AZ US	2017-10-12	0	0	0
FLAGSTAFF AIRPORT, AZ US	2017-10-13	0	0	0
FLAGSTAFF AIRPORT, AZ US	2017-10-14	0	0	0
FLAGSTAFF AIRPORT, AZ US	2017-10-15	0	0	0
FLAGSTAFF AIRPORT, AZ US	2017-10-16	0	0	0
FLAGSTAFF AIRPORT, AZ US	2017-10-17	0	0	0
FLAGSTAFF AIRPORT, AZ US	2017-10-18	0	0	0
FLAGSTAFF AIRPORT, AZ US	2017-10-19	0	0	0
FLAGSTAFF AIRPORT, AZ US	2017-10-20	0	0	0
FLAGSTAFF AIRPORT, AZ US	2017-10-21	0	0	0
FLAGSTAFF AIRPORT, AZ US	2017-10-22	0	0	0
FLAGSTAFF AIRPORT, AZ US	2017-10-23	0	0	0
FLAGSTAFF AIRPORT, AZ US	2017-10-24	0	0	0
FLAGSTAFF AIRPORT, AZ US	2017-10-25	0	0	0
FLAGSTAFF AIRPORT, AZ US	2017-10-26	0	0	0
FLAGSTAFF AIRPORT, AZ US	2017-10-27	0	0	0
FLAGSTAFF AIRPORT, AZ US	2017-10-28	0	0	0
FLAGSTAFF AIRPORT, AZ US	2017-10-29	0	0	0
FLAGSTAFF AIRPORT, AZ US	2017-10-30	0	0	0
FLAGSTAFF AIRPORT, AZ US	2017-10-31	0	0	0
FLAGSTAFF AIRPORT, AZ US	2017-11-01	0	0	0
FLAGSTAFF AIRPORT, AZ US	2017-11-02	0	0	0
FLAGSTAFF AIRPORT, AZ US	2017-11-03	0	0	0
FLAGSTAFF AIRPORT, AZ US	2017-11-04	0	0	0
FLAGSTAFF AIRPORT, AZ US	2017-11-05	0	0	0
FLAGSTAFF AIRPORT, AZ US	2017-11-06	0	0	0
FLAGSTAFF AIRPORT, AZ US	2017-11-07	0	0	0
FLAGSTAFF AIRPORT, AZ US	2017-11-08	0	0	0
FLAGSTAFF AIRPORT, AZ US	2017-11-09	0	0	0
FLAGSTAFF AIRPORT, AZ US	2017-11-10	0	0	0
FLAGSTAFF AIRPORT, AZ US	2017-11-11	0	0	0
FLAGSTAFF AIRPORT, AZ US	2017-11-12	0	0	0
FLAGSTAFF AIRPORT, AZ US	2017-11-13	0	0	0
FLAGSTAFF AIRPORT, AZ US	2017-11-14	0	0	0
FLAGSTAFF AIRPORT, AZ US	2017-11-15	0	0	0
FLAGSTAFF AIRPORT, AZ US	2017-11-16	0	0	0
FLAGSTAFF AIRPORT, AZ US	2017-11-17	0.01	0	0
FLAGSTAFF AIRPORT, AZ US	2017-11-18	0	0	0
FLAGSTAFF AIRPORT, AZ US	2017-11-19	0	0	0
FLAGSTAFF AIRPORT, AZ US	2017-11-20	0	0	0
FLAGSTAFF AIRPORT, AZ US	2017-11-21	0	0	0
FLAGSTAFF AIRPORT, AZ US	2017-11-22	0	0	0
FLAGSTAFF AIRPORT, AZ US	2017-11-23	0	0	0
FLAGSTAFF AIRPORT, AZ US	2017-11-24	0	0	0
FLAGSTAFF AIRPORT, AZ US	2017-11-25	0	0	0
FLAGSTAFF AIRPORT, AZ US	2017-11-26	0	0	0
FLAGSTAFF AIRPORT, AZ US	2017-11-27	0	0	0
FLAGSTAFF AIRPORT, AZ US	2017-11-28	0	0	0
FLAGSTAFF AIRPORT, AZ US	2017-11-29	0	0	0
FLAGSTAFF AIRPORT, AZ US	2017-11-30	0	0	0
FLAGSTAFF AIRPORT, AZ US	2017-12-01	0	0	0
FLAGSTAFF AIRPORT, AZ US	2017-12-02	0	0	0
FLAGSTAFF AIRPORT, AZ US	2017-12-03	0	0	0
FLAGSTAFF AIRPORT, AZ US	2017-12-04	0	0	0
FLAGSTAFF AIRPORT, AZ US	2017-12-05	0	0	0
FLAGSTAFF AIRPORT, AZ US	2017-12-06	0	0	0
FLAGSTAFF AIRPORT, AZ US	2017-12-07	0	0	0
FLAGSTAFF AIRPORT, AZ US	2017-12-08	0	0	0
FLAGSTAFF AIRPORT, AZ US	2017-12-09	0	0	0
FLAGSTAFF AIRPORT, AZ US	2017-12-10	0	0	0
FLAGSTAFF AIRPORT, AZ US	2017-12-11	0	0	0
FLAGSTAFF AIRPORT, AZ US	2017-12-12	0	0	0
FLAGSTAFF AIRPORT, AZ US	2017-12-13	0	0	0
FLAGSTAFF AIRPORT, AZ US	2017-12-14	0	0	0
FLAGSTAFF AIRPORT, AZ US	2017-12-15	0	0	0
FLAGSTAFF AIRPORT, AZ US	2017-12-16	0	0	0
FLAGSTAFF AIRPORT, AZ US	2017-12-17	0	0	0
FLAGSTAFF AIRPORT, AZ US	2017-12-18	0	0	0
FLAGSTAFF AIRPORT, AZ US	2017-12-19	0	0	0
FLAGSTAFF AIRPORT, AZ US	2017-12-20	0	0	0
FLAGSTAFF AIRPORT, AZ US	2017-12-21	0	0	0
FLAGSTAFF AIRPORT, AZ US	2017-12-22	0	0	0
FLAGSTAFF AIRPORT, AZ US	2017-12-23	0	0	0
FLAGSTAFF AIRPORT, AZ US	2017-12-24	0	0	0
FLAGSTAFF AIRPORT, AZ US	2017-12-25	0	0	0
FLAGSTAFF AIRPORT, AZ US	2017-12-26	0	0	0
FLAGSTAFF AIRPORT, AZ US	2017-12-27	0	0	0
FLAGSTAFF AIRPORT, AZ US	2017-12-28	0	0	0
FLAGSTAFF AIRPORT, AZ US	2017-12-29	0	0	0
FLAGSTAFF AIRPORT, AZ US	2017-12-30	0	0	0
FLAGSTAFF AIRPORT, AZ US	2017-12-31	0	0	0
FLAGSTAFF AIRPORT, AZ US	2018-01-01	0	0	0
FLAGSTAFF AIRPORT, AZ US	2018-01-02	0	0	0
FLAGSTAFF AIRPORT, AZ US	2018-01-03	0	0	0
FLAGSTAFF AIRPORT, AZ US	2018-01-04	0	0	0
FLAGSTAFF AIRPORT, AZ US	2018-01-05	0	0	0
FLAGSTAFF AIRPORT, AZ US	2018-01-06	0	0	0
FLAGSTAFF AIRPORT, AZ US	2018-01-07	0	0	0
FLAGSTAFF AIRPORT, AZ US	2018-01-08	0	0	0
FLAGSTAFF AIRPORT, AZ US	2018-01-09	1.05	2.7	3.1
FLAGSTAFF AIRPORT, AZ US	2018-01-10	0.14	2	5.1
FLAGSTAFF AIRPORT, AZ US	2018-01-11	0	0	3.1
FLAGSTAFF AIRPORT, AZ US	2018-01-12	0	0	1.2
FLAGSTAFF AIRPORT, AZ US	2018-01-13	0	0	1.2
FLAGSTAFF AIRPORT, AZ US	2018-01-14	0	0	0
FLAGSTAFF AIRPORT, AZ US	2018-01-15	0	0	0
FLAGSTAFF AIRPORT, AZ US	2018-01-16	0	0	0
FLAGSTAFF AIRPORT, AZ US	2018-01-17	0	0	0
FLAGSTAFF AIRPORT, AZ US	2018-01-18	0	0	0
FLAGSTAFF AIRPORT, AZ US	2018-01-19	0	0	0
FLAGSTAFF AIRPORT, AZ US	2018-01-20	0.51	5.6	5.1
FLAGSTAFF AIRPORT, AZ US	2018-01-21	0.01	1	5.9
FLAGSTAFF AIRPORT, AZ US	2018-01-22	0	0	0
FLAGSTAFF AIRPORT, AZ US	2018-01-23	0	0	0
FLAGSTAFF AIRPORT, AZ US	2018-01-24	0	0	0
FLAGSTAFF AIRPORT, AZ US	2018-01-25	0	0	0
FLAGSTAFF AIRPORT, AZ US	2018-01-26	0	0	0
FLAGSTAFF AIRPORT, AZ US	2018-01-27	0	0	0
FLAGSTAFF AIRPORT, AZ US	2018-01-28	0	0	0
FLAGSTAFF AIRPORT, AZ US	2018-01-29	0	0	0
FLAGSTAFF AIRPORT, AZ US	2018-01-30	0	0	0
FLAGSTAFF AIRPORT, AZ US	2018-01-31	0	0	0
FLAGSTAFF AIRPORT, AZ US	2018-02-01	0	0	0
FLAGSTAFF AIRPORT, AZ US	2018-02-02	0	0	0
FLAGSTAFF AIRPORT, AZ US	2018-02-03	0	0	0
FLAGSTAFF AIRPORT, AZ US	2018-02-04	0	0	0
FLAGSTAFF AIRPORT, AZ US	2018-02-05	0	0	0
FLAGSTAFF AIRPORT, AZ US	2018-02-06	0	0	0
FLAGSTAFF AIRPORT, AZ US	2018-02-07	0	0	0
FLAGSTAFF AIRPORT, AZ US	2018-02-08	0	0	0
FLAGSTAFF AIRPORT, AZ US	2018-02-09	0	0	0
FLAGSTAFF AIRPORT, AZ US	2018-02-10	0	0	0
FLAGSTAFF AIRPORT, AZ US	2018-02-11	0	0	0
FLAGSTAFF AIRPORT, AZ US	2018-02-12	0.83	2.6	0
FLAGSTAFF AIRPORT, AZ US	2018-02-13	0.12	0.3	2
FLAGSTAFF AIRPORT, AZ US	2018-02-14	0.35	3.1	3.1
FLAGSTAFF AIRPORT, AZ US	2018-02-15	0.02	0	3.1
FLAGSTAFF AIRPORT, AZ US	2018-02-16	0	0	0
FLAGSTAFF AIRPORT, AZ US	2018-02-17	0	0	0
FLAGSTAFF AIRPORT, AZ US	2018-02-18	0	0	0
FLAGSTAFF AIRPORT, AZ US	2018-02-19	0.12	1.5	0
FLAGSTAFF AIRPORT, AZ US	2018-02-20	0	0	1.2
FLAGSTAFF AIRPORT, AZ US	2018-02-21	0	0	0
FLAGSTAFF AIRPORT, AZ US	2018-02-22	0	0	0
FLAGSTAFF AIRPORT, AZ US	2018-02-23	0.47	7	7.1
FLAGSTAFF AIRPORT, AZ US	2018-02-24	0	0	7.1
FLAGSTAFF AIRPORT, AZ US	2018-02-25	0	0	5.9
FLAGSTAFF AIRPORT, AZ US	2018-02-26	0	0	5.1
FLAGSTAFF AIRPORT, AZ US	2018-02-27	0.21	3	5.1
FLAGSTAFF AIRPORT, AZ US	2018-02-28	0.25	5.5	7.9
FLAGSTAFF AIRPORT, AZ US	2018-03-01	0	0	5.9
FLAGSTAFF AIRPORT, AZ US	2018-03-02	0	0	0
FLAGSTAFF AIRPORT, AZ US	2018-03-03	0	0	0
FLAGSTAFF AIRPORT, AZ US	2018-03-04	0.01	0	0
FLAGSTAFF AIRPORT, AZ US	2018-03-05	0	0	0
FLAGSTAFF AIRPORT, AZ US	2018-03-06	0	0	0
FLAGSTAFF AIRPORT, AZ US	2018-03-07	0	0	0
FLAGSTAFF AIRPORT, AZ US	2018-03-08	0	0	0
FLAGSTAFF AIRPORT, AZ US	2018-03-09	0	0	0
FLAGSTAFF AIRPORT, AZ US	2018-03-10	0.1	0	0
FLAGSTAFF AIRPORT, AZ US	2018-03-11	0.24	0	0
FLAGSTAFF AIRPORT, AZ US	2018-03-12	0	0	0
FLAGSTAFF AIRPORT, AZ US	2018-03-13	0	0	0
FLAGSTAFF AIRPORT, AZ US	2018-03-14	0	0	0
FLAGSTAFF AIRPORT, AZ US	2018-03-15	0.25	1.1	0
FLAGSTAFF AIRPORT, AZ US	2018-03-16	0	0	1.2
FLAGSTAFF AIRPORT, AZ US	2018-03-17	0.02	0.1	0
FLAGSTAFF AIRPORT, AZ US	2018-03-18	0.24	1.9	2
FLAGSTAFF AIRPORT, AZ US	2018-03-19	0	0	0
FLAGSTAFF AIRPORT, AZ US	2018-03-20	0	0	0
FLAGSTAFF AIRPORT, AZ US	2018-03-21	0	0	0
FLAGSTAFF AIRPORT, AZ US	2018-03-22	0	0	0
FLAGSTAFF AIRPORT, AZ US	2018-03-23	0.07	0	0
FLAGSTAFF AIRPORT, AZ US	2018-03-24	0	0	0
FLAGSTAFF AIRPORT, AZ US	2018-03-25	0	0	0
FLAGSTAFF AIRPORT, AZ US	2018-03-26	0	0	0
FLAGSTAFF AIRPORT, AZ US	2018-03-27	0	0	0
FLAGSTAFF AIRPORT, AZ US	2018-03-28	0	0	0
FLAGSTAFF AIRPORT, AZ US	2018-03-29	0	0	0
FLAGSTAFF AIRPORT, AZ US	2018-03-30	0	0	0
FLAGSTAFF AIRPORT, AZ US	2018-03-31	0	0	0
FLAGSTAFF AIRPORT, AZ US	2018-04-01	0	0	0
FLAGSTAFF AIRPORT, AZ US	2018-04-02	0	0	0
FLAGSTAFF AIRPORT, AZ US	2018-04-03	0	0	0
FLAGSTAFF AIRPORT, AZ US	2018-04-04	0	0	0
FLAGSTAFF AIRPORT, AZ US	2018-04-05	0	0	0
FLAGSTAFF AIRPORT, AZ US	2018-04-06	0	0	0
FLAGSTAFF AIRPORT, AZ US	2018-04-07	0	0	0
FLAGSTAFF AIRPORT, AZ US	2018-04-08	0	0	0
FLAGSTAFF AIRPORT, AZ US	2018-04-09	0	0	0
FLAGSTAFF AIRPORT, AZ US	2018-04-10	0	0	0
FLAGSTAFF AIRPORT, AZ US	2018-04-11	0	0	0
FLAGSTAFF AIRPORT, AZ US	2018-04-12	0	0	0
FLAGSTAFF AIRPORT, AZ US	2018-04-13	0	0	0
FLAGSTAFF AIRPORT, AZ US	2018-04-14	0	0	0
FLAGSTAFF AIRPORT, AZ US	2018-04-15	0	0	0
FLAGSTAFF AIRPORT, AZ US	2018-04-16	0	0	0
FLAGSTAFF AIRPORT, AZ US	2018-04-17	0	0	0
FLAGSTAFF AIRPORT, AZ US	2018-04-18	0	0	0
FLAGSTAFF AIRPORT, AZ US	2018-04-19	0	0	0
FLAGSTAFF AIRPORT, AZ US	2018-04-20	0.06	0	0
FLAGSTAFF AIRPORT, AZ US	2018-04-21	0	0	0
FLAGSTAFF AIRPORT, AZ US	2018-04-22	0	0	0
FLAGSTAFF AIRPORT, AZ US	2018-04-23	0	0	0
FLAGSTAFF AIRPORT, AZ US	2018-04-24	0	0	0
FLAGSTAFF AIRPORT, AZ US	2018-04-25	0	0	0
FLAGSTAFF AIRPORT, AZ US	2018-04-26	0	0	0
FLAGSTAFF AIRPORT, AZ US	2018-04-27	0	0	0
FLAGSTAFF AIRPORT, AZ US	2018-04-28	0	0	0
FLAGSTAFF AIRPORT, AZ US	2018-04-29	0	0	0
FLAGSTAFF AIRPORT, AZ US	2018-04-30	0	0	0
FLAGSTAFF AIRPORT, AZ US	2018-05-01	0.32	0	0
FLAGSTAFF AIRPORT, AZ US	2018-05-02	0.3	0.6	0
FLAGSTAFF AIRPORT, AZ US	2018-05-03	0	0	0
FLAGSTAFF AIRPORT, AZ US	2018-05-04	0	0	0
FLAGSTAFF AIRPORT, AZ US	2018-05-05	0	0	0
FLAGSTAFF AIRPORT, AZ US	2018-05-06	0	0	0
FLAGSTAFF AIRPORT, AZ US	2018-05-07	0	0	0
FLAGSTAFF AIRPORT, AZ US	2018-05-08	0	0	0
FLAGSTAFF AIRPORT, AZ US	2018-05-09	0	0	0
FLAGSTAFF AIRPORT, AZ US	2018-05-10	0	0	0
FLAGSTAFF AIRPORT, AZ US	2018-05-11	0	0	0
FLAGSTAFF AIRPORT, AZ US	2018-05-12	0	0	0
FLAGSTAFF AIRPORT, AZ US	2018-05-13	0	0	0
FLAGSTAFF AIRPORT, AZ US	2018-05-14	0	0	0
FLAGSTAFF AIRPORT, AZ US	2018-05-15	0	0	0
FLAGSTAFF AIRPORT, AZ US	2018-05-16	0	0	0
FLAGSTAFF AIRPORT, AZ US	2018-05-17	0	0	0
FLAGSTAFF AIRPORT, AZ US	2018-05-18	0	0	0
FLAGSTAFF AIRPORT, AZ US	2018-05-19	0	0	0
FLAGSTAFF AIRPORT, AZ US	2018-05-20	0	0	0
FLAGSTAFF AIRPORT, AZ US	2018-05-21	0	0	0
FLAGSTAFF AIRPORT, AZ US	2018-05-22	0	0	0
FLAGSTAFF AIRPORT, AZ US	2018-05-23	0	0	0
FLAGSTAFF AIRPORT, AZ US	2018-05-24	0	0	0
FLAGSTAFF AIRPORT, AZ US	2018-05-25	0	0	0
FLAGSTAFF AIRPORT, AZ US	2018-05-26	0	0	0
FLAGSTAFF AIRPORT, AZ US	2018-05-27	0	0	0
FLAGSTAFF AIRPORT, AZ US	2018-05-28	0	0	0
FLAGSTAFF AIRPORT, AZ US	2018-05-29	0	0	0
FLAGSTAFF AIRPORT, AZ US	2018-05-30	0	0	0
FLAGSTAFF AIRPORT, AZ US	2018-05-31	0	0	0
FLAGSTAFF AIRPORT, AZ US	2018-06-01	0	0	0
FLAGSTAFF AIRPORT, AZ US	2018-06-02	0	0	0
FLAGSTAFF AIRPORT, AZ US	2018-06-03	0	0	0
FLAGSTAFF AIRPORT, AZ US	2018-06-04	0	0	0
FLAGSTAFF AIRPORT, AZ US	2018-06-05	0	0	0
FLAGSTAFF AIRPORT, AZ US	2018-06-06	0	0	0
FLAGSTAFF AIRPORT, AZ US	2018-06-07	0	0	0
FLAGSTAFF AIRPORT, AZ US	2018-06-08	0	0	0
FLAGSTAFF AIRPORT, AZ US	2018-06-09	0	0	0
FLAGSTAFF AIRPORT, AZ US	2018-06-10	0	0	0
FLAGSTAFF AIRPORT, AZ US	2018-06-11	0	0	0
FLAGSTAFF AIRPORT, AZ US	2018-06-12	0	0	0
FLAGSTAFF AIRPORT, AZ US	2018-06-13	0	0	0
FLAGSTAFF AIRPORT, AZ US	2018-06-14	0	0	0
FLAGSTAFF AIRPORT, AZ US	2018-06-15	0	0	0
FLAGSTAFF AIRPORT, AZ US	2018-06-16	0.38	0	0
FLAGSTAFF AIRPORT, AZ US	2018-06-17	0	0	0
FLAGSTAFF AIRPORT, AZ US	2018-06-18	0	0	0
FLAGSTAFF AIRPORT, AZ US	2018-06-19	0	0	0
FLAGSTAFF AIRPORT, AZ US	2018-06-20	0	0	0
FLAGSTAFF AIRPORT, AZ US	2018-06-21	0	0	0
FLAGSTAFF AIRPORT, AZ US	2018-06-22	0	0	0
FLAGSTAFF AIRPORT, AZ US	2018-06-23	0	0	0
FLAGSTAFF AIRPORT, AZ US	2018-06-24	0	0	0
FLAGSTAFF AIRPORT, AZ US	2018-06-25	0	0	0
FLAGSTAFF AIRPORT, AZ US	2018-06-26	0	0	0
FLAGSTAFF AIRPORT, AZ US	2018-06-27	0	0	0
FLAGSTAFF AIRPORT, AZ US	2018-06-28	0	0	0
FLAGSTAFF AIRPORT, AZ US	2018-06-29	0	0	0
FLAGSTAFF AIRPORT, AZ US	2018-06-30	0	0	0
FLAGSTAFF AIRPORT, AZ US	2018-07-01	0	0	0
FLAGSTAFF AIRPORT, AZ US	2018-07-02	0	0	0
FLAGSTAFF AIRPORT, AZ US	2018-07-03	0	0	0
FLAGSTAFF AIRPORT, AZ US	2018-07-04	0	0	0
FLAGSTAFF AIRPORT, AZ US	2018-07-05	0	0	0
FLAGSTAFF AIRPORT, AZ US	2018-07-06	0	0	0
FLAGSTAFF AIRPORT, AZ US	2018-07-07	0.34	0	0
FLAGSTAFF AIRPORT, AZ US	2018-07-08	0.1	0	0
FLAGSTAFF AIRPORT, AZ US	2018-07-09	0.16	0	0
FLAGSTAFF AIRPORT, AZ US	2018-07-10	0.02	0	0
FLAGSTAFF AIRPORT, AZ US	2018-07-11	0.09	0	0
FLAGSTAFF AIRPORT, AZ US	2018-07-12	0.19	0	0
FLAGSTAFF AIRPORT, AZ US	2018-07-13	0	0	0
FLAGSTAFF AIRPORT, AZ US	2018-07-14	0.07	0	0
FLAGSTAFF AIRPORT, AZ US	2018-07-15	0.28	0	0
FLAGSTAFF AIRPORT, AZ US	2018-07-16	0.1	0	0
FLAGSTAFF AIRPORT, AZ US	2018-07-17	0	0	0
FLAGSTAFF AIRPORT, AZ US	2018-07-18	0.23	0	0
FLAGSTAFF AIRPORT, AZ US	2018-07-19	0.18	0	0
FLAGSTAFF AIRPORT, AZ US	2018-07-20	0	0	0
FLAGSTAFF AIRPORT, AZ US	2018-07-21	0.02	0	0
FLAGSTAFF AIRPORT, AZ US	2018-07-22	0	0	0
FLAGSTAFF AIRPORT, AZ US	2018-07-23	0	0	0
FLAGSTAFF AIRPORT, AZ US	2018-07-24	0	0	0
FLAGSTAFF AIRPORT, AZ US	2018-07-25	0.08	0	0
FLAGSTAFF AIRPORT, AZ US	2018-07-26	0	0	0
FLAGSTAFF AIRPORT, AZ US	2018-07-27	1.11	0	0
FLAGSTAFF AIRPORT, AZ US	2018-07-28	0.05	0	0
FLAGSTAFF AIRPORT, AZ US	2018-07-29	0.12	0	0
FLAGSTAFF AIRPORT, AZ US	2018-07-30	0	0	0
FLAGSTAFF AIRPORT, AZ US	2018-07-31	0	0	0
FLAGSTAFF AIRPORT, AZ US	2018-08-01	0.97	0	0
FLAGSTAFF AIRPORT, AZ US	2018-08-02	0.14	0	0
FLAGSTAFF AIRPORT, AZ US	2018-08-03	0	0	0
FLAGSTAFF AIRPORT, AZ US	2018-08-04	0	0	0
FLAGSTAFF AIRPORT, AZ US	2018-08-05	0	0	0
FLAGSTAFF AIRPORT, AZ US	2018-08-06	0	0	0
FLAGSTAFF AIRPORT, AZ US	2018-08-07	0	0	0
FLAGSTAFF AIRPORT, AZ US	2018-08-08	0	0	0
FLAGSTAFF AIRPORT, AZ US	2018-08-09	0.75	0	0
FLAGSTAFF AIRPORT, AZ US	2018-08-10	0.01	0	0
FLAGSTAFF AIRPORT, AZ US	2018-08-11	0.22	0	0
FLAGSTAFF AIRPORT, AZ US	2018-08-12	0.01	0	0
FLAGSTAFF AIRPORT, AZ US	2018-08-13	0.59	0	0
FLAGSTAFF AIRPORT, AZ US	2018-08-14	1.31	0	0
FLAGSTAFF AIRPORT, AZ US	2018-08-15	0	0	0
FLAGSTAFF AIRPORT, AZ US	2018-08-16	0.01	0	0
FLAGSTAFF AIRPORT, AZ US	2018-08-17	0.06	0	0
FLAGSTAFF AIRPORT, AZ US	2018-08-18	0	0	0
FLAGSTAFF AIRPORT, AZ US	2018-08-19	0	0	0
FLAGSTAFF AIRPORT, AZ US	2018-08-20	0	0	0
FLAGSTAFF AIRPORT, AZ US	2018-08-21	0.11	0	0
FLAGSTAFF AIRPORT, AZ US	2018-08-22	0.06	0	0
FLAGSTAFF AIRPORT, AZ US	2018-08-23	0.14	0	0
FLAGSTAFF AIRPORT, AZ US	2018-08-24	0.19	0	0
FLAGSTAFF AIRPORT, AZ US	2018-08-25	0.58	0	0
FLAGSTAFF AIRPORT, AZ US	2018-08-26	0	0	0
FLAGSTAFF AIRPORT, AZ US	2018-08-27	0	0	0
FLAGSTAFF AIRPORT, AZ US	2018-08-28	0	0	0
FLAGSTAFF AIRPORT, AZ US	2018-08-29	0	0	0
FLAGSTAFF AIRPORT, AZ US	2018-08-30	0	0	0
FLAGSTAFF AIRPORT, AZ US	2018-08-31	0	0	0
FLAGSTAFF AIRPORT, AZ US	2018-09-01	0.01	0	0
FLAGSTAFF AIRPORT, AZ US	2018-09-02	0.63	0	0
