# Supplementary material for: Shifts in northern Arizona plant and insect pollinator communities between 2 years with substantially different precipitation totals
Source: Copernicus journal article supplement (doi:10.5194/we-25-5-2025), 2025-01-10
Supplement: Supplementary file 1 [file we-25-5-2025-supplement.zip]

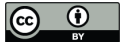

## *Supplement of*

# **Shifts in northern Arizona plant and insect pollinator communities between 2 years with substantially different precipitation totals**

**Paige R. Chesshire and Liza M. Holeski**

*Correspondence to:* Paige R. Chesshire (pchesshi@esf.edu)

- we-25-5-2025-supplement-title-page.pdf
- Supplemental File 1 Sampling Dates and Sites Visited.xlsx
- Supplemental File 2 Insect Species.xlsx
- Supplemental File 3 Plant Species.xlsx
- Supplemental File 4 NCEI precip values.xlsx
- Supplemental File 5 Core Generalist Species.xlsx

The copyright of individual parts of the supplement might differ from the article licence.
