# Supplementary material for: Shifts in northern Arizona plant and insect pollinator communities between 2 years with substantially different precipitation totals
Source: Copernicus journal article supplement (doi:10.5194/we-25-5-2025), 2025-01-10
Supplement: Supplementary file 2 [file Supplemental File 1 Sampling Dates and Sites Visited.xlsx]

## Sheet: Sheet1
	Year	Sampling Period Dates	Ponderosa Pine Sites Sampled	Mixed Conifer Sites Sampled	Spruce Fir Sites Sampled
	2017 (wet)	7/25 - 7/27	2, 4, 5, 6, 7, 8	3, 4, 5, 6	1, 2, 3, 4, 5, 6
	2017 (wet)	8/1 - 8/3	2, 4, 5, 6, 7, 8	1, 2, 3, 4, 5, 6	1, 2, 3, 4, 5, 6
	2017 (wet)	814/ - 8/18	2, 4, 5, 6, 7, 8	1, 2, 3, 4, 5, 6	1, 2, 3, 4, 5, 6
	2017 (wet)	8/25 - 8/31	2, 4, 5, 6, 7, 8	1, 2, 3, 4, 5, 6	1, 2, 3, 4, 5, 6
			24 PP sites	22 MC sites	24 SF sites
	2018 (dry)	7/16 - 7/19	2, 4, 5, 6, 7, 8	1, 2, 3, 4, 5, 6	1, 2, 3, 4, 5, 6
	2018 (dry)	7/30 - 8/1	2, 4, 6, 7, 8	1, 2, 3, 4, 5, 6	1, 2, 3, 4, 5, 6
	2018 (dry)	8/6 - 8/8	2, 4, 5, 6, 7, 8	1, 2, 3, 4, 5, 6	1, 2, 3, 4, 5, 6
	2018 (dry)	8/13 - 8/15	2, 4, 5, 6, 7, 8	1, 2, 3, 4, 5, 6	1, 2, 3, 4, 5, 6
	2018 (dry)	8/26 - 8/30	2, 4, 5, 6, 7, 8	1, 2, 3, 4, 5, 6	1, 2, 3, 4, 5, 6
			29 PP sites	30 MC sites	30 SF sites
