# Supplementary material for: Shifts in northern Arizona plant and insect pollinator communities between 2 years with substantially different precipitation totals
Source: Copernicus journal article supplement (doi:10.5194/we-25-5-2025), 2025-01-10
Supplement: Supplementary file 3 [file Supplemental File 2 Insect Species.xlsx]

## Sheet: overlap_Full_Table_all_LZ_weekR
		Ponderosa Pine		Mixed Conifer		Spruce Fir
Insect Species	Taxa Group	Wet Year	Dry Year	Wet Year	Dry Year	Wet Year	Dry Year		# of Life Zones in 2017	# of Life Zones in 2018		Pollinators Sampled both Years			Species collected during extra sampling period in 2018, (July 16th - July 19th) not collected any other week
Anthophora terminalis	Bee	1	1	1	1	1	1		3	3		Anthophora terminalis	Bee		Andrena medionitens	Bee
Bombus huntii	Bee	1		1	1	1	1		3	2		Bombus huntii	Bee		Andrena tegularis	Bee
Andrena nubecula	Bee			1		1			2	0		Fannia 001	Fly		Coelioxys rufitarsis	Bee
Bombus fervidus	Bee	1				1			2	0		Hesperia colorado	Butterfly/moth		Megachile angelarum	Bee
Bombus morrisoni	Bee	1		1					2	0		Oarisma garita	Butterfly/moth		Megachile comata	Bee
Dialictus new hairyT1	Bee			1	1	1	1		2	2		Peleteria Sphyrimyia 002	Fly		Sphecodes 004	Bee
Dialictus sp M2	Bee		1	1	1	1	1		2	3		Plebejus icarioides	Butterfly/moth		Poanes taxiles	Butterfly/moth
Hylaeus cookii	Bee			1	1	1	1		2	2		Plebejus melissa	Butterfly/moth		Prodoxinae 001	Butterfly/moth
Lasioglossum 004	Bee	1		1					2	0		Poladryas arachne	Butterfly/moth		Anthrax oedipus	Fly
Melissodes confusus	Bee	1	1	1	1				2	2		Ptilodexia 002	Fly		Aphoebantini 001	Fly
Protandrena Heterosarus 003	Bee		1	1	1	1	1		2	3		Systoechus vulgaris	Fly		Dipalta serpentina	Fly
Agapostemon angelicus	Bee	1							1	0		Adejeania vexatrix	Fly		Ginglymia johnsoni	Fly
Andrena 101	Bee					1			1	0		Anastoechus melanohalteralis	Fly		Mesograpta marginata	Fly
Andrena amphibola	Bee			1					1	0		Dialictus new hairyT1	Bee		Muscoidea 009	Fly
Andrena cyanophila	Bee			1	1				1	1		Dialictus sp M2	Bee		Paragus 001	Fly
Andrena miranda	Bee	1							1	0		Exoprosopa rostrifera	Fly		Sphaerophoria philantus	Fly
Anthophora montana	Bee	1					1		1	1		Glaucopsyche lygdamus	Butterfly/moth
Apis mellifera	Bee	1	1		1				1	2		Hemipenthes sinuosa	Fly
Bombus insularis	Bee					1			1	0		Hylaeus cookii	Bee
Bombus occidentalis	Bee			1					1	0		Melissodes confusus	Bee
Ceratina nanula	Bee	1							1	0		Muscoidea 001	Fly
Colletes 102	Bee			1			1		1	1		Muscoidea 004	Fly		Insect Type	Total Species Across Years	Percentage
Colletes compactus	Bee	1							1	0		Peleteria iterans	Fly		Bees	52	0.374101
Colletes gilensis	Bee	1			1				1	1		Protandrena Heterosarus 003	Bee		Flies	57	0.410072
Diadasia diminuta	Bee	1	1						1	1		Ptilodexia 001	Fly		Butterflies/moths	30	0.215827
Diadasia rinconis	Bee	1							1	0		Tachina latianulum	Fly
Eucera Synhalonia 001	Bee	1							1	0		Villa 001	Fly
Eucera 102	Bee					1			1	0		Andrena cyanophila	Bee
Heriades cressoni	Bee	1							1	0		Anthophora montana	Bee
Lasioglossum ruficorne	Bee					1			1	0		Apis mellifera	Bee
Lasioglossum sisymbrii	Bee					1			1	0		Colletes 102	Bee
Megachile mellitarsis	Bee				1	1			1	1		Colletes gilensis	Bee
Megachile relativa	Bee			1			1		1	1		Copestylum mexicanum	Fly
Melissodes fasciatellus	Bee			1					1	0		Dexiini 003	Fly
Melissodes perpolitus	Bee			1					1	0		Diadasia diminuta	Bee
Protandrena Heterosarus 001	Bee			1	1		1		1	2		Eristalis interruptus	Fly
Protandrena Heterosarus 002	Bee			1	1				1	1		Eupeodes volucris	Fly
Protandrena Heterosarus 004	Bee		1	1	1		1		1	3		Geron 001	Fly
Sphecodes 001	Bee	1							1	0		Goniini 001	Fly
Ashmeadiella cactorum	Bee		1				1		0	2		Hesperidae 003	Butterfly/moth
Colletes 104	Bee		1						0	1		Lapposyrphus lapponicus	Fly
Diadasia ochracea	Bee		1						0	1		Megachile mellitarsis	Bee
Eucera lippiae	Bee		1						0	1		Megachile relativa	Bee
Halictus 101	Bee		1						0	1		Phthiria 003	Fly
Hylaeus annulatus	Bee						1		0	1		Pipizini 001	Fly
Lasioglossum trizonatum	Bee						1		0	1		Platycheirus 001	Fly
Megachile frigida	Bee						1		0	1		Plebejus saepiolus	Butterfly/moth
Megachile pugnata	Bee				1				0	1		Protandrena Heterosarus 001	Bee
Melissodes rivalis	Bee		1						0	1		Protandrena Heterosarus 002	Bee
Melissodes tristis	Bee		1						0	1		Protandrena Heterosarus 004	Bee
Osmia 102	Bee						1		0	1		Scaeva pyrastri	Fly
Stelis rudbeckiarum	Bee				1				0	1		Speyeria hesperis	Butterfly/moth
Hesperia colorado	Butterfly/moth	1		1	1	1	1		3	2		Strymon melinus	Butterfly/moth
Oarisma garita	Butterfly/moth	1	1	1	1	1	1		3	3		Terellia occidentalis	Fly
Plebejus icarioides	Butterfly/moth	1		1	1	1	1		3	2		Xanthoepalpus argenteus	Fly
Plebejus melissa	Butterfly/moth	1	1	1	1	1	1		3	3
Poladryas arachne	Butterfly/moth	1	1	1	1	1	1		3	3
Celastrina echo	Butterfly/moth	1				1			2	0
Euaresta bellula	Butterfly/moth			1		1			2	0
Glaucopsyche lygdamus	Butterfly/moth			1		1	1		2	1
Noctuinae 001	Butterfly/moth			1		1			2	0
Vanessa cardui	Butterfly/moth			1		1			2	0
Ctenucha venosa	Butterfly/moth	1							1	0
Euarestoides acutangulus	Butterfly/moth			1					1	0
Hesperidae 001	Butterfly/moth					1			1	0
Hesperidae 003	Butterfly/moth			1			1		1	1
Micro lep 004	Butterfly/moth			1					1	0
Neophasia menapia	Butterfly/moth			1					1	0
Phyciodes campestris	Butterfly/moth			1					1	0
Plebejus saepiolus	Butterfly/moth			1	1				1	1
Scythridid 003	Butterfly/moth			1					1	0
Speyeria hesperis	Butterfly/moth					1	1		1	1
Strymon melinus	Butterfly/moth	1	1						1	1
Hyles lineata	Butterfly/moth						1		0	1
Leptotes marina	Butterfly/moth				1				0	1
Micro lep 007	Butterfly/moth				1				0	1
Noctuinae 002	Butterfly/moth				1				0	1
Noctuini 001	Butterfly/moth				1				0	1
Scythridid 001	Butterfly/moth				1		1		0	2
Scythridid 002	Butterfly/moth				1		1		0	2
Scythris 001	Butterfly/moth				1				0	1
Thorybes pylades	Butterfly/moth						1		0	1
Fannia 001	Fly	1	1	1	1	1	1		3	3
Peleteria Sphyrimyia 002	Fly	1	1	1	1	1	1		3	3
Ptilodexia 002	Fly	1	1	1	1	1	1		3	3
Systoechus vulgaris	Fly	1		1	1	1	1		3	2
Adejeania vexatrix	Fly	1	1	1	1				2	2
Astoechus melanohalteralis	Fly	1	1	1	1				2	2
Exoprosopa rostrifera	Fly	1	1	1	1				2	2
Hemipenthes sinuosa	Fly	1	1	1	1		1		2	3
Juriniopsis aurifrons	Fly	1		1					2	0
Muscoidea 001	Fly	1	1	1	1		1		2	3
Muscoidea 004	Fly	1		1	1				2	1
Peleteria iterans	Fly			1	1	1	1		2	2
Ptilodexia 001	Fly	1	1	1	1				2	2
Sphaerophoria pyrrhina	Fly	1		1					2	0
Tachina latianulum	Fly			1	1	1	1		2	2
Villa 001	Fly		1	1	1	1	1		2	3
Bombylius major	Fly	1							1	0
Chrysotoxum 002	Fly	1							1	0
Copestylum mexicanum	Fly			1	1				1	1
Dexiini 003	Fly		1	1	1				1	2
Epeolus pusillus	Fly	1							1	0
Eristalis interruptus	Fly	1	1						1	1
Eupeodes volucris	Fly	1	1						1	1
Geron 001	Fly	1	1		1		1		1	3
Goniini 001	Fly			1	1				1	1
Gymnosoma rotundatum	Fly					1			1	0
Lapposyrphus lapponicus	Fly				1	1			1	1
Muscoidea 002	Fly			1					1	0
Paracantha gentilis	Fly	1							1	0
Paragus haemorrhous	Fly	1							1	0
Phthiria 003	Fly	1	1						1	1
Pipizini 001	Fly	1			1				1	1
Platycheirus 001	Fly					1	1		1	1
Scaeva pyrastri	Fly				1	1			1	1
Syrphus 001	Fly					1			1	0
Tachinini 001	Fly			1					1	0
Tachinini 002	Fly			1					1	0
Terellia occidentalis	Fly		1	1					1	1
Xanthoepalpus argenteus	Fly		1	1	1				1	2
Xylota subfasciata	Fly			1					1	0
Chalcosyrphus 003	Fly						1		0	1
Chalcosyrphus 004	Fly				1				0	1
Chamaemyia 001	Fly						1		0	1
Cheilosia 002	Fly				1				0	1
Chrysopilus 004	Fly				1				0	1
Dasysyrphus creper	Fly		1		1				0	2
Dexiini 004	Fly		1		1				0	2
Mochlosoma 001	Fly		1		1				0	2
Muscid 005	Fly		1						0	1
Muscoidea 012	Fly						1		0	1
Platycheirus pictipes	Fly				1				0	1
Protodejeania hystricosa	Fly				1		1		0	2
Sarcophagidae 002	Fly						1		0	1
Tachinini 003	Fly						1		0	1
Tachytrechus 002	Fly						1		0	1
Tephritis 001	Fly		1						0	1
Xylota flavitibia	Fly						1		0	1
