# Supplementary material for: Shifts in northern Arizona plant and insect pollinator communities between 2 years with substantially different precipitation totals
Source: Copernicus journal article supplement (doi:10.5194/we-25-5-2025), 2025-01-10
Supplement: Supplementary file 4 [file Supplemental File 3 Plant Species.xlsx]

## Sheet: PLANTS_overlap_Full_Table_all_L
	Ponderosa Pine		Mixed Conifer		Spruce Fir
Species with Interaction Partners	Wet Year	Dry Year	Wet Year	Dry Year	Wet Year	Dry Year		# of Life Zones in 2017	# of Life Zones in 2018		# of life Zones Both Years
Achillea millefolium					1	1		1	1		2		Plants with Interaction Partners in 2017	33
Agoseris aurantiaca						1		0	1		1		Plants with Interaction Partners in 2018	38
Agoseris glauca		1						0	1		1		Plants with Interaction Partners occurring Both years	30
Astragalus allochrous	1	1	1		1	1		3	2		5
Astragalus humistratus					1	1		1	1		2
Calochortus ambiguus					1			1	0		1
Campanula parryi	1		1	1	1	1		3	2		5
Cirsium wheeleri	1	1	1	1	1	1		3	3		6
Cryptantha setosissima	1	1						1	1		2
Dasiphora fruticosa			1	1				1	1		2
Daucus carota	1		1	1				2	1		3
Echeandia flavescens	1	1						1	1		2
Eremogone fendleri			1	1	1	1		2	2		4
Erigeron divergens	1		1	1	1			3	1		4
Erigeron flagellaris	1	1	1	1	1	1		3	3		6
Erigeron sp.				1		1		0	2		2
Eriogonum racemosum	1	1				1		1	2		3
Gentiana affinis			1					1	0		1
Geranium richardsonii						1		0	1		1
Geum triflorum				1				0	1		1
Gutierrezia sarothrae	1							1	0		1
Hackelia floribunda				1				0	1		1
Heliomeris multiflora			1					1	0		1
Hymenoxys hoopesii			1	1				1	1		2
Hymenoxys richardsonii				1				0	1		1
Ipomopsis aggregata				1				0	1		1
Linaria dalmatica	1	1						1	1		2
Linum lewisii			1	1				1	1		2
Lithospermum multiflorum		1						0	1		1
Lotus wrightii			1					1	0		1
Lupinus argenteus	1	1	1	1	1	1		3	3		6
Mirabilis oxybaphoides		1	1	1		1		1	3		4
Oxytropis lambertii	1		1	1	1	1		3	2		5
Penstemon virgatus	1				1			2	0		2
Potentilla hippiana			1	1	1	1		2	2		4
Pseudocymopterus montanus		1				1		0	2		2
Senecio eremophilus				1				0	1		1
Senecio multilobatus		1						0	1		1
Sphaeralcea fendleri	1	1						1	1		2
Symphyotrichum ascendens	1	1	1					2	1		3
Taraxacum officinale	1	1		1				1	2		3
Tragopogon dubius	1		1					2	0		2
Trifolium longipes			1	1				1	1		2
Verbascum thapsus	1		1	1				2	1		3
Verbena macdougalii	1	1	1	1				2	2		4
