# Supplementary material for: Shifts in northern Arizona plant and insect pollinator communities between 2 years with substantially different precipitation totals
Source: Copernicus journal article supplement (doi:10.5194/we-25-5-2025), 2025-01-10
Supplement: Supplementary file 6 [file Supplemental File 5 Core Generalist Species.xlsx]

## Sheet: Generalist Tables
Ponderosa Pine
	2017	Gc Value	Total Plant Species in 2017	% of 2017 interactions	Total Individuals in 2017	% of 2017 individuals
	Plebejus.melissa_17	4.67546	7	0.0843373	14	0.112		*obtain all the data for each COLUMN using the R script that gives you quick answers on numbers for each generalist
	Anastoechus.melanohalteralis_17	2.07945	4	0.0481928	8	0.064		*as well as the number of interactions and number of total individuals
	Apis.mellifera_17	2.07945	5	0.060241	18	0.144		*all comes from R script
	Exoprosopa.rostrifera_17	2.07945	4	0.0481928	8	0.064		*the second thing is pasted below for convenience
	Melissodes.confusus_17	1.43045	4	0.0481928	4	0.032
			Total	0.289157	52	0.416
								Lifezone	Year	NumInteractions	NumInsects
	2018	Gc Value	Total Plant Species in 2018	% of 2018 interactions	Total Individuals in 2018	% of 2018 individuals		PP	2017	83	125
	Ptilodexia.002_18	4.7516	8	0.114286	18	0.132353		PP	2018	70	136
	Fannia.001_18	1.68605	4	0.0571429	10	0.0735294		MC	2017	122	240
			Total	0.171429	28	0.205882		MC	2018	133	357
								SF	2017	79	261
Mixed Conifer								SF	2018	105	285
	2017	Gc Value	Total Plant Species in 2017	% of 2017 interactions	Total Individuals in 2017	% of 2017 individuals
	Fannia.001_17	5.20537	8	0.0655738	38	0.158333
	Ptilodexia.002_17	2.99418	8	0.0655738	19	0.0791667
	Oarisma.garita_17	2.55194	7	0.057377	18	0.075
	Bombus.huntii_17	1.66746	4	0.0327869	16	0.0666667
	Plebejus.melissa_17	1.66746	6	0.0491803	9	0.0375
			Total	0.270492	100	0.416667
	2018	Gc Value	Total Plant Species in 2018	% of 2018 interactions	Total Individuals in 2018	% of 2018 individuals
	Ptilodexia.002_18	5.67512	13	0.0977444	100	0.280112
	Fannia.001_18	1.99565	6	0.0451128	12	0.0336134
	Peleteria..Sphyrimyia..002_18	1.99565	6	0.0451128	14	0.0392157
	Adejeania.vexatrix_18	1.6277	7	0.0526316	34	0.0952381
	Hemipenthes.sinuosa_18	1.25975	5	0.037594	21	0.0588235
			Total	0.278195	181	0.507003
Spruce Fir
	2017	Gc Value	Total Plant Species in 2017	% of 2017 interactions	Total Individuals in 2017	% of 2017 individuals
	Fannia.001_17	5.53652	11	0.139241	150	0.574713
	Plebejus.melissa_17	1.39192	6	0.0759494	15	0.0574713
			Total	0.21519	165	0.632184
	2018	Gc Value	Total Plant Species in 2018	% of 2018 interactions	Total Individuals in 2018	% of 2018 individuals
	Oarisma.garita_18	3.52177	7	0.0666667	33	0.115789
	Fannia.001_18	2.97003	5	0.047619	49	0.17193
	Villa.001_18	2.41828	6	0.0571429	42	0.147368
	Plebejus.melissa_18	2.14241	8	0.0761905	14	0.0491228
	Ptilodexia.002_18	1.31479	4	0.0380952	25	0.0877193
	Hemipenthes.sinuosa_18	1.03892	4	0.0380952	10	0.0350877
	Scythridid.001_18	1.03892	5	0.047619	17	0.0596491
			Total	0.371429	190	0.666667

## Sheet: Raw Gc Values All
Ponderosa 2017	Gc Value		Mixed Conifer 2017	Gc Value		Spruce Fir 2017	Gc Value		Ponderosa 2018	Gc Value		Mixed Conifer 2018	Gc Value		Spruce Fir 2018	Gc Value
Plebejus.melissa_17	4.67546		Fannia.001_17	5.20537		Fannia.001_17	5.53652		Ptilodexia.002_18	4.7516		Ptilodexia.002_18	5.67512		Oarisma.garita_18	3.52177
Anastoechus.melanohalteralis_17	2.07945		Ptilodexia.002_17	2.99418		Plebejus.melissa_17	1.39192		Fannia.001_18	1.68605		Fannia.001_18	1.99565		Fannia.001_18	2.97003
Apis.mellifera_17	2.07945		Oarisma.garita_17	2.55194		Anthophora.terminalis_17	0.997197		Dialictus.sp..M2_18	0.919665		Peleteria..Sphyrimyia..002_18	1.99565		Villa.001_18	2.41828
Exoprosopa.rostrifera_17	2.07945		Bombus.huntii_17	1.66746		Oarisma.garita_17	0.602473		Exoprosopa.rostrifera_18	0.919665		Adejeania.vexatrix_18	1.6277		Plebejus.melissa_18	2.14241
Melissodes.confusus_17	1.43045		Plebejus.melissa_17	1.66746		Villa.001_17	0.207749		Peleteria..Sphyrimyia..002_18	0.919665		Hemipenthes.sinuosa_18	1.25975		Ptilodexia.002_18	1.31479
Eucera..Synhalonia..001_17	0.781451		Dialictus.sp..M2_17	0.782981		Bombus.huntii_17	0.0103875		Phthiria.003_18	0.919665		Scythridid.002_18	0.891805		Hemipenthes.sinuosa_18	1.03892
Oarisma.garita_17	0.781451		Poladryas.arachne_17	0.782981		Glaucopsyche.lygdamus_17	0.0103875		Plebejus.melissa_18	0.919665		Protandrena..Heterosarus..003_18	0.891805		Scythridid.001_18	1.03892
Ptilodexia.002_17	0.781451		Protandrena..Heterosarus..001_17	0.782981		Peleteria.iterans_17	0.0103875		Ptilodexia.001_18	0.919665		Villa.001_18	0.891805		Hylaeus.cookii_18	0.76305
Strymon.melinus_17	0.781451		Anthophora.terminalis_17	0.340742		Ptilodexia.002_17	0.0103875		Anastoechus.melanohalteralis_18	0.153277		Anastoechus.melanohalteralis_18	0.523857		Peleteria..Sphyrimyia..002_18	0.487178
Adejeania.vexatrix_17	0.132449		Hemipenthes.sinuosa_17	0.340742		Systoechus.vulgaris_17	0.0103875		Apis.mellifera_18	0.153277		Oarisma.garita_18	0.523857		Dialictus.sp..M2_18	0.211306
Anthophora.terminalis_17	0.132449		Melissodes.confusus_17	0.340742		Celastrina.echo_17	-0.186974		Geron.001_18	0.153277		Plebejus.melissa_18	0.523857		Dialictus.new.hairyT1_18	0.211306
Colletes.gilensis_17	0.132449		Muscoidea.001_17	0.340742		Dialictus.sp..M2_17	-0.186974		Hemipenthes.sinuosa_18	0.153277		Poladryas.arachne_18	0.523857		Hesperia.colorado_18	0.211306
Eupeodes.volucris_17	0.132449		Peleteria..Sphyrimyia..002_17	0.340742		Lapposyrphus.lapponicus_17	-0.186974		Melissodes.confusus_18	0.153277		Apis.mellifera_18	0.15591		Peleteria.iterans_18	0.211306
Fannia.001_17	0.132449		Xanthoepalpus.argenteus_17	0.340742		Lasioglossum.sisymbrii_17	-0.186974		Muscoidea.001_18	0.153277		Copestylum.mexicanum_18	0.15591		Protandrena..Heterosarus..003_18	0.211306
Muscoidea.001_17	0.132449		Adejeania.vexatrix_17	-0.101498		Noctuinae.001_17	-0.186974		Oarisma.garita_18	0.153277		Dialictus.sp..M2_18	0.15591		Glaucopsyche.lygdamus_18	-0.0645658
Ptilodexia.001_17	0.132449		Andrena.nubecula_17	-0.101498		Peleteria..Sphyrimyia..002_17	-0.186974		Protandrena..Heterosarus..003_18	0.153277		Hylaeus.cookii_18	0.15591		Systoechus.vulgaris_18	-0.0645658
Systoechus.vulgaris_17	0.132449		Dialictus.new.hairyT1_17	-0.101498		Poladryas.arachne_17	-0.186974		Terellia.occidentalis_18	0.153277		Melissodes.confusus_18	0.15591		Anthophora.montana_18	-0.340438
Agapostemon.angelicus_17	-0.516553		Hesperia.colorado_17	-0.101498		Speyeria.hesperis_17	-0.186974		Villa.001_18	0.153277		Muscoidea.001_18	0.15591		Bombus.huntii_18	-0.340438
Andrena.miranda_17	-0.516553		Hylaeus.cookii_17	-0.101498		Tachina.latianulum_17	-0.186974		Adejeania.vexatrix_18	-0.61311		Protandrena..Heterosarus..001_18	0.15591		Colletes.102_18	-0.340438
Anthophora.montana_17	-0.516553		Micro.lep.004_17	-0.101498		Vanessa.cardui_17	-0.186974		Anthophora.terminalis_18	-0.61311		Protandrena..Heterosarus..004_18	0.15591		Hesperidae.003_18	-0.340438
Bombus.fervidus_17	-0.516553		Noctuinae.001_17	-0.101498		Andrena.101_17	-0.384336		Ashmeadiella.cactorum_18	-0.61311		Andrena.cyanophila_18	-0.212038		Scythridid.002_18	-0.340438
Bombus.huntii_17	-0.516553		Peleteria.iterans_17	-0.101498		Andrena.nubecula_17	-0.384336		Colletes.104_18	-0.61311		Bombus.huntii_18	-0.212038		Muscoidea.012_18	-0.340438
Bombus.morrisoni_17	-0.516553		Phyciodes.campestris_17	-0.101498		Bombus.fervidus_17	-0.384336		Dasysyrphus.creper_18	-0.61311		Cheilosia.002_18	-0.212038		Plebejus.icarioides_18	-0.340438
Bombylius.major_17	-0.516553		Plebejus.icarioides_17	-0.101498		Bombus.insularis_17	-0.384336		Dexiini.003_18	-0.61311		Exoprosopa.rostrifera_18	-0.212038		Poladryas.arachne_18	-0.340438
Celastrina.echo_17	-0.516553		Protandrena..Heterosarus..002_17	-0.101498		Dialictus.new.hairyT1_17	-0.384336		Dexiini.004_18	-0.61311		Geron.001_18	-0.212038		Protandrena..Heterosarus..001_18	-0.340438
Ceratina.nanula_17	-0.516553		Protandrena..Heterosarus..004_17	-0.101498		Euaresta.bellula_17	-0.384336		Diadasia.diminuta_18	-0.61311		Scythridid.001_18	-0.212038		Anthophora.terminalis_18	-0.61631
Chrysotoxum.002_17	-0.516553		Systoechus.vulgaris_17	-0.101498		Eucera.102_17	-0.384336		Diadasia.ochracea_18	-0.61311		Ptilodexia.001_18	-0.212038		Tachinini.003_18	-0.61631
Colletes.compactus_17	-0.516553		Tachina.latianulum_17	-0.101498		Gymnosoma.rotundatum_17	-0.384336		Eristalis.interruptus_18	-0.61311		Systoechus.vulgaris_18	-0.212038		Ashmeadiella.cactorum_18	-0.61631
Ctenucha.venosa_17	-0.516553		Vanessa.cardui_17	-0.101498		Hesperia.colorado_17	-0.384336		Eucera.lippiae_18	-0.61311		Tachina.latianulum_18	-0.212038		Chalcosyrphus.003_18	-0.61631
Diadasia.diminuta_17	-0.516553		Villa.001_17	-0.101498		Hesperidae.001_17	-0.384336		Eupeodes.volucris_18	-0.61311		Mochlosoma.001_18	-0.212038		Geron.001_18	-0.61631
Diadasia.rinconis_17	-0.516553		Anastoechus.melanohalteralis_17	-0.543737		Hylaeus.cookii_17	-0.384336		Halictus.101_18	-0.61311		Xanthoepalpus.argenteus_18	-0.212038		Hylaeus.annulatus_18	-0.61631
Epeolus.pusillus_17	-0.516553		Andrena.amphibola_17	-0.543737		Lasioglossum.ruficorne_17	-0.384336		Melissodes.rivalis_18	-0.61311		Anthophora.terminalis_18	-0.579985		Hyles.lineata_18	-0.61631
Eristalis.interruptus_17	-0.516553		Andrena.cyanophila_17	-0.543737		Megachile.mellitarsis_17	-0.384336		Melissodes.tristis_18	-0.61311		Chalcosyrphus.004_18	-0.579985		Lasioglossum.trizonatum_18	-0.61631
Geron.001_17	-0.516553		Bombus.morrisoni_17	-0.543737		Platycheirus.001_17	-0.384336		Muscid.005_18	-0.61311		Chrysopilus.004_18	-0.579985		Megachile.frigida_18	-0.61631
Hemipenthes.sinuosa_17	-0.516553		Bombus.occidentalis_17	-0.543737		Plebejus.icarioides_17	-0.384336		Poladryas.arachne_18	-0.61311		Colletes.gilensis_18	-0.579985		Megachile.relativa_18	-0.61631
Heriades.cressoni_17	-0.516553		Colletes.102_17	-0.543737		Protandrena..Heterosarus..003_17	-0.384336		Protandrena..Heterosarus..004_18	-0.61311		Dasysyrphus.creper_18	-0.579985		Muscoidea.001_18	-0.61631
Hesperia.colorado_17	-0.516553		Copestylum.mexicanum_17	-0.543737		Scaeva.pyrastri_17	-0.384336		Strymon.melinus_18	-0.61311		Dexiini.003_18	-0.579985		Tachytrechus.002_18	-0.61631
Juriniopsis.aurifrons_17	-0.516553		Dexiini.003_17	-0.543737		Syrphus.001_17	-0.384336		Mochlosoma.001_18	-0.61311		Dexiini.004_18	-0.579985		Chamaemyia.001_18	-0.61631
Lasioglossum.004_17	-0.516553		Euaresta.bellula_17	-0.543737					Tephritis.001_18	-0.61311		Dialictus.new.hairyT1_18	-0.579985		Osmia.102_18	-0.61631
Muscoidea.004_17	-0.516553		Euarestoides.acutangulus_17	-0.543737					Xanthoepalpus.argenteus_18	-0.61311		Goniini.001_18	-0.579985		Platycheirus.001_18	-0.61631
Paracantha.gentilis_17	-0.516553		Exoprosopa.rostrifera_17	-0.543737								Hesperia.colorado_18	-0.579985		Protandrena..Heterosarus..004_18	-0.61631
Paragus.haemorrhous_17	-0.516553		Glaucopsyche.lygdamus_17	-0.543737								Lapposyrphus.lapponicus_18	-0.579985		Protodejeania.hystricosa_18	-0.61631
Peleteria..Sphyrimyia..002_17	-0.516553		Goniini.001_17	-0.543737								Noctuini.001_18	-0.579985		Sarcophagidae.002_18	-0.61631
Phthiria.003_17	-0.516553		Hesperidae.003_17	-0.543737								Leptotes.marina_18	-0.579985		Speyeria.hesperis_18	-0.61631
Pipizini.001_17	-0.516553		Juriniopsis.aurifrons_17	-0.543737								Megachile.mellitarsis_18	-0.579985		Tachina.latianulum_18	-0.61631
Plebejus.icarioides_17	-0.516553		Lasioglossum.004_17	-0.543737								Megachile.pugnata_18	-0.579985		Thorybes.pylades_18	-0.61631
Poladryas.arachne_17	-0.516553		Megachile.relativa_17	-0.543737								Scythris.001_18	-0.579985		Xylota.flavitibia_18	-0.61631
Sphaerophoria.pyrrhina_17	-0.516553		Melissodes.fasciatellus_17	-0.543737								Micro.lep.007_18	-0.579985
Sphecodes.001_17	-0.516553		Melissodes.perpolitus_17	-0.543737								Muscoidea.004_18	-0.579985
			Scythridid.003_17	-0.543737								Noctuinae.002_18	-0.579985
			Muscoidea.004_17	-0.543737								Peleteria.iterans_18	-0.579985
			Muscoidea.002_17	-0.543737								Pipizini.001_18	-0.579985
			Neophasia.menapia_17	-0.543737								Platycheirus.pictipes_18	-0.579985
			Plebejus.saepiolus_17	-0.543737								Plebejus.icarioides_18	-0.579985
			Protandrena..Heterosarus..003_17	-0.543737								Plebejus.saepiolus_18	-0.579985
			Ptilodexia.001_17	-0.543737								Protandrena..Heterosarus..002_18	-0.579985
			Sphaerophoria.pyrrhina_17	-0.543737								Protodejeania.hystricosa_18	-0.579985
			Tachinini.002_17	-0.543737								Scaeva.pyrastri_18	-0.579985
			Tachinini.001_17	-0.543737								Stelis.rudbeckiarum_18	-0.579985
			Terellia.occidentalis_17	-0.543737
			Xylota.subfasciata_17	-0.543737

## Sheet: % increase or decrease
Ponderosa	Gc Value 2017	Gc Value 2018			Mixed Conifer	Gc Value 2017	Gc Value 2018			Spruce Fir	Gc Value 2017	Gc Value 2018
Diadasia.diminuta	-0.516553	-0.61311	decrease		Dexiini.003	-0.543737	-0.579985	decrease		Platycheirus.001	-0.384336	-0.61631	decrease		Summary	# of Species	Percentage
Eristalis.interruptus	-0.516553	-0.61311	decrease		Goniini.001	-0.543737	-0.579985	decrease		Plebejus.icarioides	-0.384336	-0.340438	decrease		decrease @ PP	13	0.619048
Poladryas.arachne	-0.516553	-0.61311	decrease		Muscoidea.004	-0.543737	-0.579985	decrease		Speyeria.hesperis	-0.186974	-0.61631	decrease		increase @ PP	8	0.380952
Adejeania.vexatrix	0.132449	-0.61311	decrease		Plebejus.saepiolus	-0.543737	-0.579985	decrease		Tachina.latianulum	-0.186974	-0.61631	decrease		decrease @MC	22	0.628571
Anthophora.terminalis	0.132449	-0.61311	decrease		Dialictus.new.hairyT1	-0.101498	-0.579985	decrease		Poladryas.arachne	-0.186974	-0.340438	decrease		increase @ MC	13	0.371429
Eupeodes.volucris	0.132449	-0.61311	decrease		Hesperia.colorado	-0.101498	-0.579985	decrease		Bombus.huntii	0.0103875	-0.340438	decrease		decrease @ SF	10	0.47619
Strymon.melinus	0.781451	-0.61311	decrease		Peleteria.iterans	-0.101498	-0.579985	decrease		Glaucopsyche.lygdamus	0.0103875	-0.0645658	decrease		increase @ SF	11	0.52381
Oarisma.garita	0.781451	0.153277	decrease		Plebejus.icarioides	-0.101498	-0.579985	decrease		Systoechus.vulgaris	0.0103875	-0.0645658	decrease
Melissodes.confusus	1.43045	0.153277	decrease		Protandrena..Heterosarus..002	-0.101498	-0.579985	decrease		Anthophora.terminalis	0.997197	-0.61631	decrease
Anastoechus.melanohalteralis	2.07945	0.153277	decrease		Systoechus.vulgaris	-0.101498	-0.212038	decrease		Fannia.001	5.53652	2.97003	decrease
Apis.mellifera	2.07945	0.153277	decrease		Tachina.latianulum	-0.101498	-0.212038	decrease		Dialictus.new.hairyT1	-0.384336	0.211306	increase
Exoprosopa.rostrifera	2.07945	0.919665	decrease		Anthophora.terminalis	0.340742	-0.579985	decrease		Hesperia.colorado	-0.384336	0.211306	increase
Plebejus.melissa	4.67546	0.919665	decrease		Xanthoepalpus.argenteus	0.340742	-0.212038	decrease		Protandrena..Heterosarus..003	-0.384336	0.211306	increase
Geron.001	-0.516553	0.153277	increase		Melissodes.confusus	0.340742	0.15591	decrease		Hylaeus.cookii	-0.384336	0.76305	increase
Hemipenthes.sinuosa	-0.516553	0.153277	increase		Muscoidea.001	0.340742	0.15591	decrease		Dialictus.sp..M2	-0.186974	0.211306	increase
Peleteria..Sphyrimyia..002	-0.516553	0.919665	increase		Dialictus.sp..M2	0.782981	0.15591	decrease		Peleteria..Sphyrimyia..002	-0.186974	0.487178	increase
Phthiria.003	-0.516553	0.919665	increase		Protandrena..Heterosarus..001	0.782981	0.15591	decrease		Peleteria.iterans	0.0103875	0.211306	increase
Muscoidea.001	0.132449	0.153277	increase		Poladryas.arachne	0.782981	0.523857	decrease		Ptilodexia.002	0.0103875	1.31479	increase
Ptilodexia.001	0.132449	0.919665	increase		Bombus.huntii	1.66746	-0.212038	decrease		Villa.001	0.207749	2.41828	increase
Fannia.001	0.132449	1.68605	increase		Plebejus.melissa	1.66746	0.523857	decrease		Oarisma.garita	0.602473	3.52177	increase
Ptilodexia.002	0.781451	4.7516	increase		Oarisma.garita	2.55194	0.523857	decrease		Plebejus.melissa	1.39192	2.14241	increase
Ashmeadiella.cactorum		-0.61311			Fannia.001	5.20537	1.99565	decrease		Ashmeadiella.cactorum		-0.61631
Colletes.104		-0.61311			Andrena.cyanophila	-0.543737	-0.212038	increase		Chalcosyrphus.003		-0.61631
Dasysyrphus.creper		-0.61311			Exoprosopa.rostrifera	-0.543737	-0.212038	increase		Chamaemyia.001		-0.61631
Dexiini.003		-0.61311			Ptilodexia.001	-0.543737	-0.212038	increase		Geron.001		-0.61631
Dexiini.004		-0.61311			Copestylum.mexicanum	-0.543737	0.15591	increase		Hylaeus.annulatus		-0.61631
Diadasia.ochracea		-0.61311			Anastoechus.melanohalteralis	-0.543737	0.523857	increase		Hyles.lineata		-0.61631
Eucera.lippiae		-0.61311			Protandrena..Heterosarus..003	-0.543737	0.891805	increase		Lasioglossum.trizonatum		-0.61631
Halictus.101		-0.61311			Hylaeus.cookii	-0.101498	0.15591	increase		Megachile.frigida		-0.61631
Melissodes.rivalis		-0.61311			Protandrena..Heterosarus..004	-0.101498	0.15591	increase		Megachile.relativa		-0.61631
Melissodes.tristis		-0.61311			Villa.001	-0.101498	0.891805	increase		Muscoidea.001		-0.61631
Mochlosoma.001		-0.61311			Adejeania.vexatrix	-0.101498	1.6277	increase		Osmia.102		-0.61631
Muscid.005		-0.61311			Hemipenthes.sinuosa	0.340742	1.25975	increase		Protandrena..Heterosarus..004		-0.61631
Protandrena..Heterosarus..004		-0.61311			Peleteria..Sphyrimyia..002	0.340742	1.99565	increase		Protodejeania.hystricosa		-0.61631
Tephritis.001		-0.61311			Ptilodexia.002	2.99418	5.67512	increase		Sarcophagidae.002		-0.61631
Xanthoepalpus.argenteus		-0.61311			Chalcosyrphus.004		-0.579985			Tachinini.003		-0.61631
Protandrena..Heterosarus..003		0.153277			Chrysopilus.004		-0.579985			Tachytrechus.002		-0.61631
Terellia.occidentalis		0.153277			Colletes.gilensis		-0.579985			Thorybes.pylades		-0.61631
Villa.001		0.153277			Dasysyrphus.creper		-0.579985			Xylota.flavitibia		-0.61631
Dialictus.sp..M2		0.919665			Dexiini.004		-0.579985			Anthophora.montana		-0.340438
Agapostemon.angelicus	-0.516553				Lapposyrphus.lapponicus		-0.579985			Colletes.102		-0.340438
Andrena.miranda	-0.516553				Leptotes.marina		-0.579985			Hesperidae.003		-0.340438
Anthophora.montana	-0.516553				Megachile.mellitarsis		-0.579985			Muscoidea.012		-0.340438
Bombus.fervidus	-0.516553				Megachile.pugnata		-0.579985			Protandrena..Heterosarus..001		-0.340438
Bombus.huntii	-0.516553				Micro.lep.007		-0.579985			Scythridid.002		-0.340438
Bombus.morrisoni	-0.516553				Noctuinae.002		-0.579985			Hemipenthes.sinuosa		1.03892
Bombylius.major	-0.516553				Noctuini.001		-0.579985			Scythridid.001		1.03892
Celastrina.echo	-0.516553				Pipizini.001		-0.579985			Andrena.101	-0.384336
Ceratina.nanula	-0.516553				Platycheirus.pictipes		-0.579985			Andrena.nubecula	-0.384336
Chrysotoxum.002	-0.516553				Protodejeania.hystricosa		-0.579985			Bombus.fervidus	-0.384336
Colletes.compactus	-0.516553				Scaeva.pyrastri		-0.579985			Bombus.insularis	-0.384336
Ctenucha.venosa	-0.516553				Scythris.001		-0.579985			Euaresta.bellula	-0.384336
Diadasia.rinconis	-0.516553				Stelis.rudbeckiarum		-0.579985			Eucera.102	-0.384336
Epeolus.pusillus	-0.516553				Cheilosia.002		-0.212038			Gymnosoma.rotundatum	-0.384336
Heriades.cressoni	-0.516553				Geron.001		-0.212038			Hesperidae.001	-0.384336
Hesperia.colorado	-0.516553				Mochlosoma.001		-0.212038			Lasioglossum.ruficorne	-0.384336
Juriniopsis.aurifrons	-0.516553				Scythridid.001		-0.212038			Megachile.mellitarsis	-0.384336
Lasioglossum.004	-0.516553				Apis.mellifera		0.15591			Scaeva.pyrastri	-0.384336
Muscoidea.004	-0.516553				Scythridid.002		0.891805			Syrphus.001	-0.384336
Paracantha.gentilis	-0.516553				Andrena.amphibola	-0.543737				Celastrina.echo	-0.186974
Paragus.haemorrhous	-0.516553				Bombus.morrisoni	-0.543737				Lapposyrphus.lapponicus	-0.186974
Pipizini.001	-0.516553				Bombus.occidentalis	-0.543737				Lasioglossum.sisymbrii	-0.186974
Plebejus.icarioides	-0.516553				Colletes.102	-0.543737				Noctuinae.001	-0.186974
Sphaerophoria.pyrrhina	-0.516553				Euaresta.bellula	-0.543737				Vanessa.cardui	-0.186974
Sphecodes.001	-0.516553				Euarestoides.acutangulus	-0.543737
Colletes.gilensis	0.132449				Glaucopsyche.lygdamus	-0.543737
Systoechus.vulgaris	0.132449				Hesperidae.003	-0.543737
Eucera..Synhalonia..001	0.781451				Juriniopsis.aurifrons	-0.543737
					Lasioglossum.004	-0.543737
					Megachile.relativa	-0.543737
					Melissodes.fasciatellus	-0.543737
					Melissodes.perpolitus	-0.543737
					Muscoidea.002	-0.543737
					Neophasia.menapia	-0.543737
					Scythridid.003	-0.543737
					Sphaerophoria.pyrrhina	-0.543737
					Tachinini.001	-0.543737
					Tachinini.002	-0.543737
					Terellia.occidentalis	-0.543737
					Xylota.subfasciata	-0.543737
					Andrena.nubecula	-0.101498
					Micro.lep.004	-0.101498
					Noctuinae.001	-0.101498
					Phyciodes.campestris	-0.101498
					Vanessa.cardui	-0.101498
